# Supplementary material for: Palladium(0)-catalyzed cyclopropanation of benzyl bromides via C(sp3)–H bond activation
Source: Royal Society of Chemistry journal article supplement (doi:10.1039/c3cc49231a), 2014-01-01

## Supporting Information for

# Palladium(0)-catalyzed cyclopropanation of benzyl bromides via C(sp<sup>3</sup>)-H bond activation

Jiangang Mao<sup>†,‡</sup> Weiliang Bao<sup>\*,†</sup>

<sup>†</sup>Department of Chemistry, Zhejiang University, Hangzhou 310028, Zhejiang, P. R. China

<sup>‡</sup>School of Metallurgy and Chemical Engineering, Jiangxi University of Science and Technology,  
86 Hongqi Avenue, Ganzhou 341000, Jiangxi, P. R. China

E-mail: [wlbao@css.zju.edu.cn](mailto:wlbao@css.zju.edu.cn)

## Table of Contents

|                                                                                                                              |           |
|------------------------------------------------------------------------------------------------------------------------------|-----------|
| <b>1 General information</b>                                                                                                 | <b>2</b>  |
| <b>2 Substrates Preparation</b>                                                                                              | <b>2</b>  |
| 2.1 General Procedure for the Preparation of Benzyl Bromides:                                                                | 2         |
| 2.2 The Synthesis of Endo-Norbornenesuccinimides (2a, 2b):                                                                   | 3         |
| <b>3 Pd(OAc)<sub>2</sub>-Catalyzed Cyclopropanation of Benzyl Bromides and Norbornene Derivants and DFT Calculations</b>     | <b>3</b>  |
| 3.1 General Procedures for the Cyclopropanation                                                                              | 3         |
| 3.2 DFT Calculations on the origin of the selectivity between the C(sp <sup>3</sup> )-H and C(sp <sup>2</sup> )-H activation | 4         |
| 3.3 Experimental Characterization of Products                                                                                | 30        |
| <b>4 Copies for <sup>1</sup>H NMR and <sup>13</sup>C NMR</b>                                                                 | <b>40</b> |

## 1 General information

**Experimental:** All cyclopropanation([2+1] cycloaddition) reactions were carried out under an inert atmosphere of nitrogen in standard Schlenk tube. All solvents were dried by standard methods before use. All reactions were monitored by TLC with silica gel-coated plates. NMR spectra were recorded on Bruker Avance 400 (400 MHz for  $^1\text{H}$ ; 100 MHz for  $^{13}\text{C}$ ) instruments. Chemical shifts were reported in parts per million (ppm) down field from TMS with the solvent resonance as the internal standard (for  $\text{CDCl}_3$ ,  $^1\text{H}$  NMR: 7.26 ppm,  $^{13}\text{C}$  NMR: 77.16 ppm). Coupling constants ( $J$ ) were reported in Hz. Mass spectra (EI, 70 eV) were recorded on an Agilent 5975 instrument. High resolution mass spectra (HRMS) were recorded on Waters Micromass GCT instrument. All commercially available reagents were used as received.

## 2 Substrates Preparation

### 2.1 General Procedure for the Preparation of Benzyl Bromides<sup>1</sup>:

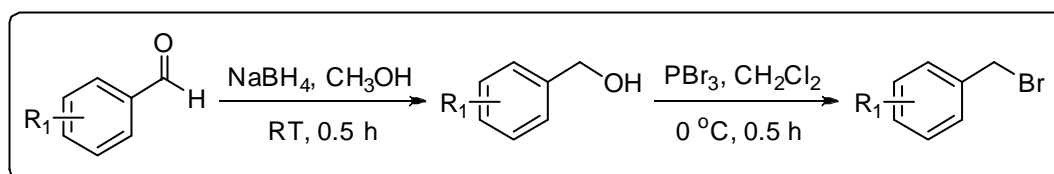

To a solution of benzaldehydes (10 mmol) dissolved in methanol (50 mL) was added sodium borohydride (20 mmol) at room temperature, and the mixture was stirred at the same temperature for 30 min and concentrated under reduced pressure. The residue was diluted with methylene chloride (500 mL) and washed with water, and dried over anhydrous  $\text{Na}_2\text{SO}_4$ , and concentrated under reduced pressure to give the corresponding crude phenylmethanols (85% yield) which were used directly without further purification.

To a solution of phenylmethanols (5 mmol) dissolved in methylene chloride (50 mL)

1. L. Feng, K. Lv, M. Liu, S. Wang, J. Zhao, X. You, S. Li, J. Cao, H. Guo, *Eur. J. Med. Chem.*, **55**, (2012) 125.

in an ice-water bath was added phosphorus tribromide (5.5 mmol), and the mixture was stirred at the same temperature for 30 min. The mixture was washed with cool water, dried over anhydrous  $\text{Na}_2\text{SO}_4$  and concentrated under reduced pressure to yield (bromomethyl)benzenes as offwhite solids or light yellow oils (80% yield).

## 2.2 The Synthesis of Endo-Norbornenesuccinimides (2a, 2b)<sup>2</sup>:

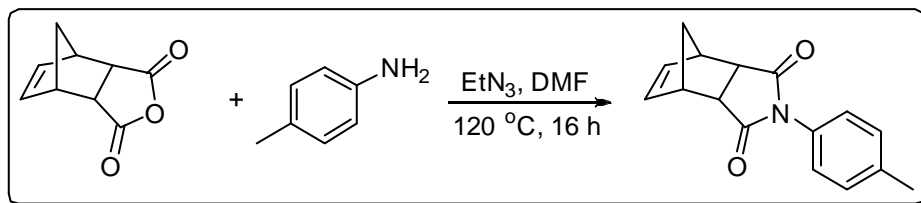

Triethylamine (6.6 mmol, 0.92 mL) and the desired anhydride (6 mmol) were added to a solution of 4-toluidine (6 mmol) in 5 mL of *N,N*-dimethylformamide (DMF). The solution was heated for 16 h at 120 °C. After it returned to room temperature, the resulting mixture was treated with water and extracted with ethyl ether and washed with 1 N HCl (20 mL). The combined organic layers were washed with brine, dried over magnesium sulfate and concentrated *in vacuo*. The residue was purified by chromatography on a column of silica gel with PE/EA=3/1 to afford the pure products as white solid (86% yield). <sup>1</sup>H NMR ( $\text{CDCl}_3$ , 400 MHz)  $\delta$  7.25 (d,  $J = 8.0$  Hz, 2H), 7.03 (d,  $J = 8.0$  Hz, 2H), 6.28 (s, 2H), 3.52 (s, 2H), 3.43-3.44 (m, 2H), 2.38 (s, 3H), 1.80 (d,  $J = 8.8$  Hz, 1H), 1.62 (d,  $J = 8.8$  Hz, 1H).

## 3 Pd(OAc)<sub>2</sub>-Catalyzed Cyclopropanation of Benzyl Bromides and Norbornene Derivants and DFT Calculations

### 3.1 General Procedures for the Cyclopropanation

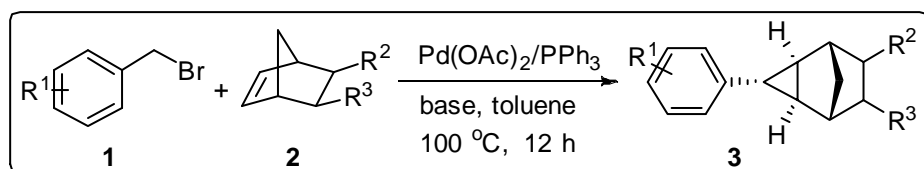

2. M. Lanier, D. Schade, E. Willems, M. Tsuda, S. Spiering, J. Kalisiak, M. Mercola, J. R. Cashman, *J. Med. Chem.* **55**, (2012) 697.

To a flame-dried Teflon-screw-capped tube equipped with a magnetic stir bar, bromide **1** (0.55 mmol, 1.2 equiv.), norbornene derivative **2** (0.5 mmol, 1.0 equiv.), Pd(OAc)<sub>2</sub> (11.22 mg, 0.05 mmol, 10 mol%), PPh<sub>3</sub> (28.85 mg, 0.11 mmol, 22 mol%), K<sub>2</sub>CO<sub>3</sub> (34.05 mg, 0.25 mmol, 0.5 equiv.) and toluene (2.0 mL) were added sequentially under nitrogen. The tube was sealed with a Teflon lined cap, the reaction mixture was stirred at 100 °C or 120 °C for 12 h. After completion of the reaction, the resulting mixture was cooled down to room temperature, diluted with CH<sub>2</sub>Cl<sub>2</sub> (10 mL), filtered through a short pad of silica gel and washed with EtOAc (30 mL). The filtrate was concentrated under vacuum and the residue was purified by silica gel column chromatography to afford the product **3**.

### 3.2 DFT Calculations on the origin of the selectivity between the C(sp<sup>3</sup>)-H and C(sp<sup>2</sup>)-H activation

#### COMPUTATIONAL DETAILS

All calculations were performed with the Gaussian 09 program.<sup>3</sup> Geometry optimizations and frequency calculations were performed with B3LYP<sup>4</sup> functional using LANL2DZ<sup>5</sup> basis set for Pd and Br combined with 6-31G(d)<sup>6</sup> basis set for all the other atoms. Single point energy calculations were also performed to further refine the results with M06-2x<sup>7</sup> functional using def2-TZVP<sup>8</sup> basis set for Pd and Br and obtained from the EMSL Basis Set Library<sup>9</sup>, combined with 6-311+G(d,p)<sup>10</sup> basis set

---

3. Gaussian 09, Revision B.01, M. J. Frisch, G. W. Trucks, H. B. Schlegel, G. E. Scuseria, M. A. Robb, J. R. Cheeseman, G. Scalmani, V. Barone, B. Mennucci, G. A. Petersson, H. Nakatsuji, M. Caricato, X. Li, H. P. Hratchian, A. F. Izmaylov, J. Bloino, G. Zheng, J. L. Sonnenberg, M. Hada, M. Ehara, K. Toyota, R. Fukuda, J. Hasegawa, M. Ishida, T. Nakajima, Y. Honda, O. Kitao, H. Nakai, T. Vreven, J. A. Montgomery, Jr., J. E. Peralta, F. Ogliaro, M. Bearpark, J. J. Heyd, E. Brothers, K. N. Kudin, V. N. Staroverov, T. Keith, R. Kobayashi, J. Normand, K. Raghavachari, A. Rendell, J. C. Burant, S. S. Iyengar, J. Tomasi, M. Cossi, N. Rega, J. M. Millam, M. Klene, J. E. Knox, J. B. Cross, V. Bakken, C. Adamo, J. Jaramillo, R. Gomperts, R. E. Stratmann, O. Yazyev, A. J. Austin, R. Cammi, C. Pomelli, J. W. Ochterski, R. L. Martin, K. Morokuma, V. G. Zakrzewski, G. A. Voth, P. Salvador, J. J. Dannenberg, S. Dapprich, A. D. Daniels, O. Farkas, J. B. Foresman, J. V. Ortiz, J. Cioslowski, and D. J. Fox, Gaussian, Inc., Wallingford CT, 2010.

4. A. D. Becke, *J. Chem. Phys.*, **98** (1993) 5648-5652.

5. a) P. J. Hay and W. R. Wadt, *J. Chem. Phys.*, **82** (1985) 270-283; b) W. R. Wadt and P. J. Hay, *J. Chem. Phys.*, **82** (1985) 284-298; c) P. J. Hay and W. R. Wadt, *J. Chem. Phys.*, **82** (1985) 299-310.

6. W. J. Hehre, R. Ditchfield, J. A. Pople, *J. Chem. Phys.* **56** (1972), 2257.

7. Y. Zhao and D. G. Truhlar, *Theor. Chem. Acc.*, **120** (2008) 215-241.

8. F. Weigend and R. Ahlrichs, *Phys. Chem. Chem. Phys.*, **7** (2005) 3297-3305.

9. a) Feller, D., *J. Comp. Chem.*, **17** (1996) 1571-1586; b) Schuchardt, K.L., Didier, B.T., Elsethagen, T., Sun, L., Gurumoorhi, V., Chase, J., Li, J., and Windus, T.L. *J. Chem. Inf. Model.*, **47**(2007) 1045-1052.

10. a) A. D. McLean and G. S. Chandler, *J. Chem. Phys.*, **72** (1980) 5639-48; b) K. Raghavachari, J. S. Binkley, R. Seeger, and J. A. Pople, *J. Chem. Phys.*, **72** (1980) 650-654.

for all the remaining atoms, as well as the solvent of toluene using the CPCM<sup>11</sup> model. Imaginary frequency in frequency calculations were used to confirm whether the geometries were intermediates or transition states. For transition states, the intrinsic reaction coordination (IRC)<sup>12</sup> calculations were performed to determine the reactants and products.

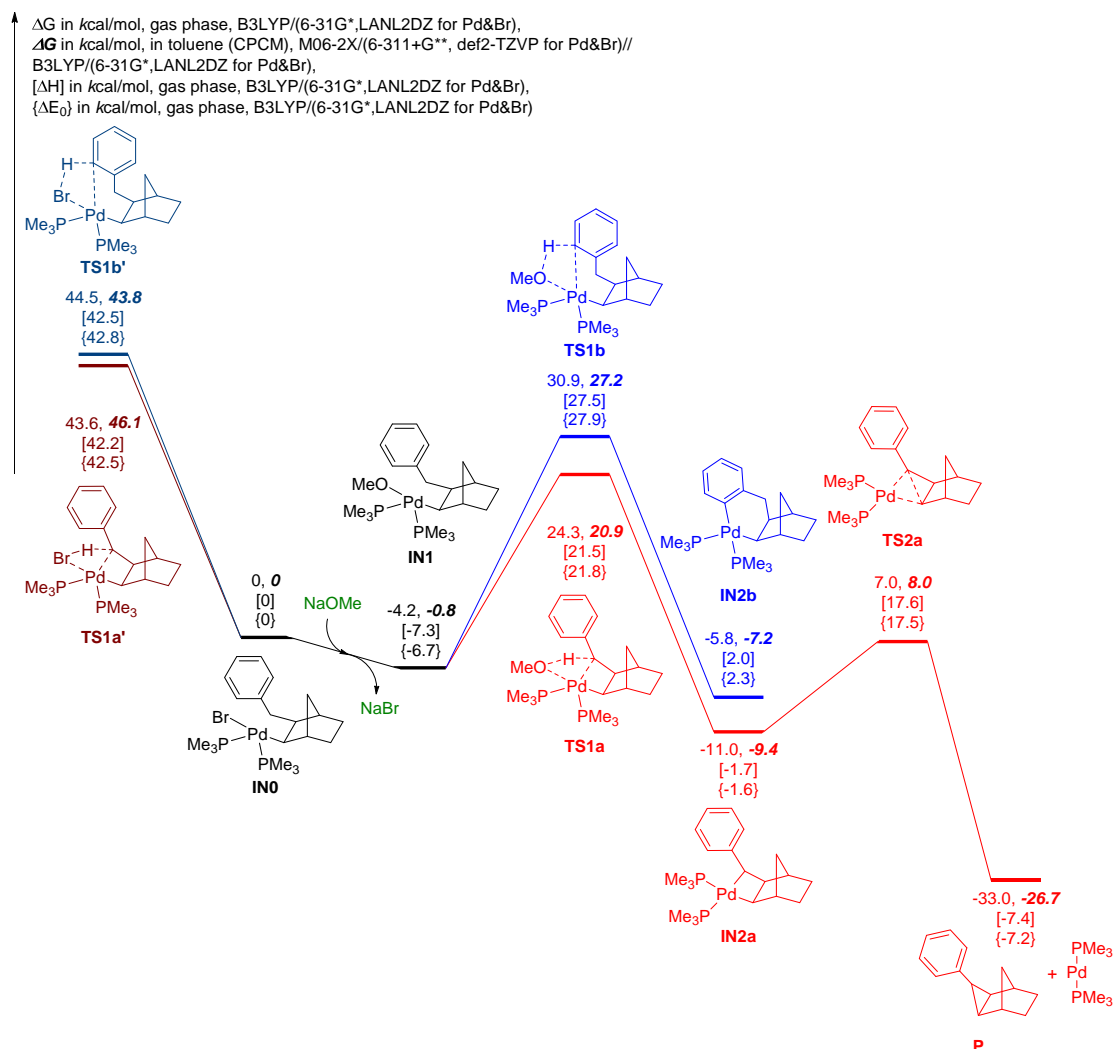

**Figure 1.** Comparison of the energy profiles of the selectivity between the C(sp<sup>3</sup>)-H activation at the benzyl and C(sp<sup>2</sup>)-H activation on the phenyl.

## ORIGIN OF SELECTIVITY

To further understand the origin of the selectivity between the C(sp<sup>3</sup>)-H at the benzyl

11. a) A. Klamt, G. Schuurmann, *J. Chem. Soc., PerkinTrans.* **2**(1993) 799; b) Andzelm, J.; Kölmel, C.; Klamt, A. *J. Chem. Phys.* **103**(1995) 9312-9320; c) Barone, V.; Cossi, M. *J. Phys. Chem. A* **102** (1998) 1995-2001; d) Cossi, M.; Rega, N.; Scalmani, G.; Barone, V. *J. Comput. Chem.* **24** (2003) 669-681.

12. a) K. Fukui, *Acc. Chem. Res.*, **14** (1981) 363-368; b) H. P. Hratchian and H. B. Schlegel, *J. Chem. Phys.*, **120** (2004), 9918-9924; c) H. P. Hratchian and H. B. Schlegel, *J. Chem. Theory and Comput.*, **1** (2005) 61-69.

and C(sp<sup>2</sup>)-H on the phenyl, we performed some DFT calculations on the deprotonation process with some simplification, namely replacement of PPh<sub>3</sub> with PMe<sub>3</sub>. As we proposed above, we firstly start with **IN0** to conduct the calculation. As shown in **Figure 1**, **IN0** could either directly undergo deprotonation or undergo ligand exchange with the external base, namely NaOMe in our calculation. But it is unlikely to be directly deprotonated under the given reaction conditions because of the rather high energy barrier. This might be due to the lack of proton affinity as well as the large radius of bromine. Thus, after ligand exchange with NaOMe, **IN1** is formed, releasing NaBr. This process is slightly exothermic. The deprotonation process of **IN1** is much easier than that of **IN0**, as we expected, since the higher proton affinity of OMe. We located both **TS1a** and **TS1b** for C(sp<sup>3</sup>)-H and C(sp<sup>2</sup>)-H respectively. To our delight, the C(sp<sup>3</sup>)-H showed much higher reactivity with a difference of more than 6 kcal/mol, which is in good accord with the experimental outcome. In addition, **IN2a** is more stable than **IN2b**, despite the rigid of 4-membered ring. These might be the results of both different degree of interaction and distortion. As shown in **Figure 2**, **TS1a** showed a much stronger interaction between OMe and H than **TS1b**, which contributes mostly to the interactions within the TSs, because the noted Pd-C and C-H are both lengthened to lead to weak interactions. Moreover, the reactive orbital of in OMe are more compliant with C(sp<sup>3</sup>)-H than with C(sp<sup>2</sup>)-H since they are sp<sup>3</sup> to most extend. In the perspective of distortion, **TS1a** showed no obvious distortion while in **TS1b** the phenyl must rotate in order to undergo deprotonation. The newly formed 6-membered ring from **TS1b** is locked in a boat conformation, making **IN2b** less stable. All these lead to the preference of C(sp<sup>3</sup>)-H at the benzyl over C(sp<sup>2</sup>)-H on the phenyl. Afterwards, the deprotonated intermediate **IN2a** would undergo normal reductive elimination (R. E.) to form the final product **P** and the active catalyst PdL<sub>2</sub>. The activation energy for this process is rather small relative to the deprotonation process, which might be explicable by the tendency to releasing the tension of the 4-membered ring in **IN2a**. And thus, the final step has little impact on the selectivity between C(sp<sup>3</sup>)-H and C(sp<sup>2</sup>)-H.

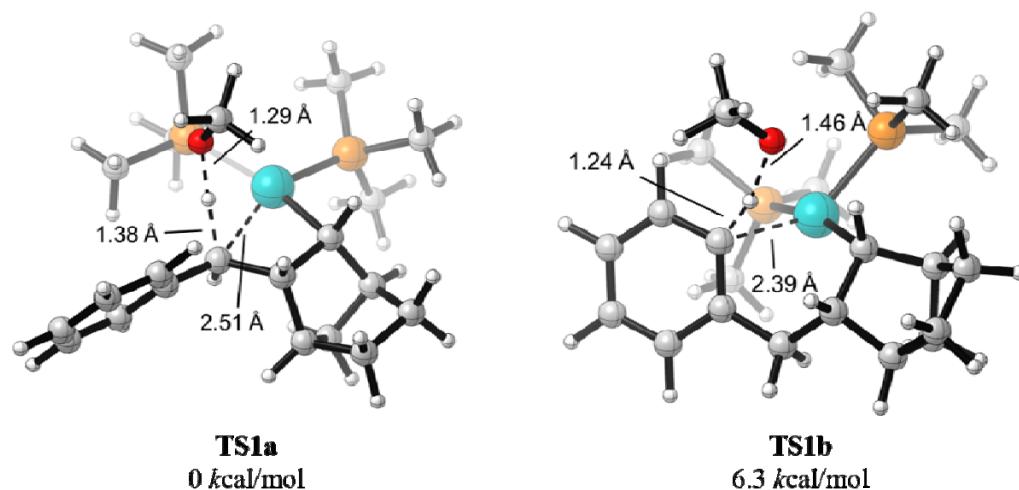

**Figure 2.** Optimized geometries of the transition states (**TS1a** and **TS1b**) with bond lengths in Å.

**Table 1.** Calculated energy values

| Species                            | ZPE <sup>a,b</sup> | H <sub>298</sub> <sup>a,c</sup> | G <sub>298</sub> <sup>a,d</sup> | E <sup>e,f</sup> | G <sup>e,f</sup> <sub>298</sub> |
|------------------------------------|--------------------|---------------------------------|---------------------------------|------------------|---------------------------------|
| <b>IN0</b>                         | -1605.399137       | -1605.367072                    | -1605.463715                    | -4167.846226     | -4167.401582                    |
| <b>IN1</b>                         | -1707.25095        | -1707.217932                    | -1707.314846                    | -1708.693409     | -1708.206953                    |
| <b>TS1a</b>                        | -1707.205552       | -1707.172108                    | -1707.269447                    | -1708.650924     | -1708.172337                    |
| <b>TS1b</b>                        | -1707.195804       | -1707.162601                    | -1707.259009                    | -1708.642871     | -1708.16234                     |
| <b>TS1a'</b>                       | -1605.331472       | -1605.29979                     | -1605.394241                    | -4167.766743     | -4167.328042                    |
| <b>TS1b'</b>                       | -1605.330881       | -1605.299311                    | -1605.392751                    | -4167.771139     | -4167.331777                    |
| <b>IN2a</b>                        | -1591.582175       | -1591.552565                    | -1591.642216                    | -1592.976491     | -1592.541893                    |
| <b>IN2b</b>                        | -1591.575859       | -1591.546599                    | -1591.633932                    | -1592.976121     | -1592.538328                    |
| <b>TS2a</b>                        | -1591.551749       | -1591.521873                    | -1591.613521                    | -1592.945043     | -1592.514215                    |
| <b>P</b>                           | -542.811911        | -542.800368                     | -542.850744                     | -542.9892421     | -542.7636171                    |
| Pd(PMe <sub>3</sub> ) <sub>2</sub> | -1048.779125       | -1048.761222                    | -1048.826652                    | -1049.988177     | -1049.805884                    |
| NaOMe                              | -277.378893        | -277.373277                     | -277.405833                     | -277.4050428     | -277.3923278                    |
| NaBr                               | -175.537718        | -175.533985                     | -175.561368                     | -2736.565321     | -2736.588303                    |
| MeOH                               | -115.660732        | -115.656497                     | -115.683452                     | -115.7074269     | -115.6786749                    |

<sup>a</sup> With B3LYP functional; 6-31G(d) for C,H,O,N and LANL2DZ for Pd and Br

<sup>b</sup> Sum of electronic and zero-point energies

<sup>c</sup> Sum of electronic and thermal enthalpies

<sup>d</sup> Sum of electronic and thermal free energies

<sup>e</sup> Electronic energies

<sup>f</sup> With M06-2X functional; 6-311+G(d,p) for C,H,O,N and def2-TZVP for Pd and Br;  
solvation with CPCM in toluene

### Cartesian coordinates

#### INO

|   |          |          |          |
|---|----------|----------|----------|
| C | -0.55662 | -0.56392 | 1.458485 |
| C | -0.73982 | -2.05007 | 1.871251 |
| C | -2.81271 | -1.41605 | 1.216458 |
| C | -1.956   | -0.16507 | 0.873253 |
| H | -0.36219 | 0.007563 | 2.367598 |
| H | -2.35309 | 0.710183 | 1.408703 |
| C | -1.83108 | -2.56458 | 0.911047 |
| H | -2.22102 | -3.54744 | 1.20422  |
| H | -1.50194 | -2.61443 | -0.12679 |
| C | -1.53655 | -2.02504 | 3.205899 |
| H | -1.59277 | -3.03505 | 3.631183 |
| H | -1.07563 | -1.38027 | 3.964097 |
| C | -2.9492  | -1.52405 | 2.756581 |
| H | -3.72943 | -2.24538 | 3.025321 |
| H | -3.22569 | -0.56641 | 3.21454  |
| H | 0.1799   | -2.63406 | 1.9137   |
| H | -3.77074 | -1.43723 | 0.688718 |
| C | -1.97579 | 0.187139 | -0.63784 |
| H | -1.24688 | 0.992396 | -0.80474 |
| H | -1.61188 | -0.66594 | -1.21868 |
| C | -3.33263 | 0.626367 | -1.15007 |



|    |          |          |          |
|----|----------|----------|----------|
| C  | -4.10988 | -0.21176 | -1.962   |
| C  | -3.85165 | 1.888476 | -0.82175 |
| C  | -5.36416 | 0.192256 | -2.42565 |
| H  | -3.72333 | -1.19075 | -2.23583 |
| C  | -5.10344 | 2.29839  | -1.28085 |
| H  | -3.26321 | 2.561851 | -0.20033 |
| C  | -5.86671 | 1.44902  | -2.08582 |
| H  | -5.94667 | -0.47576 | -3.05524 |
| H  | -5.4823  | 3.282243 | -1.01456 |
| H  | -6.84145 | 1.766279 | -2.44707 |
| Pd | 1.16043  | -0.06328 | 0.277161 |
| Br | 1.172034 | -2.39036 | -0.93758 |
| P  | 1.16403  | 2.050936 | 1.251529 |
| P  | 3.238074 | 0.27762  | -1.16249 |
| C  | 4.327745 | 1.792084 | -1.21168 |
| H  | 4.792209 | 1.968876 | -0.23635 |
| H  | 5.128518 | 1.66224  | -1.94911 |
| H  | 3.753567 | 2.682539 | -1.48679 |
| C  | 2.871323 | 0.09287  | -2.96624 |
| H  | 3.792864 | 0.080174 | -3.55992 |
| H  | 2.318513 | -0.83755 | -3.11364 |
| H  | 2.243745 | 0.926491 | -3.29935 |
| C  | 4.519727 | -1.01893 | -0.85026 |
| H  | 5.333243 | -0.95795 | -1.58255 |
| H  | 4.933166 | -0.88747 | 0.155478 |
| H  | 4.041592 | -1.9995  | -0.90289 |
| C  | 1.005561 | 3.437894 | 0.035096 |
| H  | 1.767316 | 3.353031 | -0.74314 |
| H  | 0.024418 | 3.380735 | -0.44644 |

|   |          |          |          |
|---|----------|----------|----------|
| H | 1.104142 | 4.412095 | 0.5277   |
| C | -0.10299 | 2.556379 | 2.502722 |
| H | -0.03591 | 1.924744 | 3.392882 |
| H | 0.062079 | 3.598709 | 2.797392 |
| H | -1.10892 | 2.456145 | 2.088114 |
| C | 2.713768 | 2.471196 | 2.173852 |
| H | 2.681693 | 3.498509 | 2.55504  |
| H | 2.824224 | 1.781975 | 3.01693  |
| H | 3.585785 | 2.357821 | 1.52693  |

### IN1

|   |          |          |          |
|---|----------|----------|----------|
| C | 0.346371 | 1.302856 | 0.891285 |
| C | 0.428696 | 2.82454  | 0.60247  |
| C | 2.553297 | 2.125305 | 0.280609 |
| C | 1.794015 | 0.796863 | 0.549508 |
| H | 0.1458   | 1.1649   | 1.958406 |
| H | 2.214468 | 0.287347 | 1.424076 |
| C | 1.496997 | 2.929414 | -0.50689 |
| H | 1.804145 | 3.962072 | -0.71724 |
| H | 1.208313 | 2.451333 | -1.44806 |
| C | 1.193897 | 3.470996 | 1.790333 |
| H | 1.163083 | 4.566256 | 1.717446 |
| H | 0.762359 | 3.195191 | 2.758841 |
| C | 2.648909 | 2.935461 | 1.595624 |
| H | 3.36435  | 3.760328 | 1.496982 |
| H | 2.98536  | 2.312811 | 2.432093 |
| H | -0.52305 | 3.325522 | 0.407875 |
| H | 3.517229 | 1.9791   | -0.2159  |
| C | 1.918056 | -0.19621 | -0.6386  |

|    |          |          |          |
|----|----------|----------|----------|
| H  | 1.18317  | -0.98686 | -0.47226 |
| H  | 1.659518 | 0.306765 | -1.57902 |
| C  | 3.290926 | -0.82515 | -0.75224 |
| C  | 4.225589 | -0.41234 | -1.71146 |
| C  | 3.657369 | -1.85632 | 0.128059 |
| C  | 5.490211 | -1.00232 | -1.78742 |
| H  | 3.957154 | 0.376459 | -2.41154 |
| C  | 4.917938 | -2.44847 | 0.056581 |
| H  | 2.932346 | -2.19458 | 0.865332 |
| C  | 5.84174  | -2.02188 | -0.90199 |
| H  | 6.198568 | -0.66676 | -2.54127 |
| H  | 5.179303 | -3.24812 | 0.745716 |
| H  | 6.823922 | -2.48413 | -0.96044 |
| Pd | -1.16672 | -0.05494 | 0.272701 |
| P  | -2.42998 | 1.470541 | -0.92922 |
| P  | -2.46396 | -2.19252 | -0.01812 |
| C  | -3.08444 | -2.85317 | 1.59414  |
| H  | -3.92014 | -2.24215 | 1.95181  |
| H  | -3.42102 | -3.89205 | 1.49647  |
| H  | -2.27456 | -2.79888 | 2.323179 |
| C  | -1.24845 | -3.47798 | -0.54725 |
| H  | -1.65808 | -4.48932 | -0.44031 |
| H  | -0.96665 | -3.31653 | -1.59317 |
| H  | -0.36737 | -3.35253 | 0.086158 |
| C  | -3.9116  | -2.61225 | -1.11849 |
| H  | -4.15145 | -3.6804  | -1.0547  |
| H  | -4.79897 | -2.04254 | -0.8241  |
| H  | -3.68064 | -2.37104 | -2.16097 |
| C  | -3.34563 | 2.661506 | 0.15521  |

|   |          |          |          |
|---|----------|----------|----------|
| H | -3.98786 | 2.094816 | 0.836752 |
| H | -2.64728 | 3.245277 | 0.759739 |
| H | -3.96607 | 3.344148 | -0.43728 |
| C | -1.68231 | 2.572202 | -2.21692 |
| H | -1.23473 | 1.953672 | -3.00151 |
| H | -2.45051 | 3.212952 | -2.66542 |
| H | -0.8991  | 3.198806 | -1.78889 |
| C | -3.83866 | 0.77837  | -1.91321 |
| H | -4.39281 | 1.580579 | -2.41404 |
| H | -3.46152 | 0.08384  | -2.66927 |
| H | -4.5208  | 0.233195 | -1.25638 |
| O | -0.12532 | -1.47524 | 1.418254 |
| C | -0.00054 | -1.32657 | 2.794607 |
| H | 0.597569 | -2.16322 | 3.200162 |
| H | 0.520461 | -0.40103 | 3.107119 |
| H | -0.96826 | -1.33548 | 3.339502 |

**TS1a**

|   |          |          |          |
|---|----------|----------|----------|
| C | -0.24906 | 1.811883 | 0.501245 |
| C | -0.60659 | 3.001073 | -0.4104  |
| C | 1.629361 | 2.779945 | -0.70949 |
| C | 1.28742  | 1.638775 | 0.285247 |
| H | -0.53983 | 1.960937 | 1.546861 |
| H | 1.817199 | 1.791946 | 1.234313 |
| C | 0.364925 | 2.819268 | -1.5976  |
| H | 0.353932 | 3.66588  | -2.29549 |
| H | 0.192289 | 1.896112 | -2.16095 |
| C | -0.02672 | 4.283755 | 0.254973 |
| H | -0.41428 | 5.181495 | -0.24314 |

|    |          |          |          |
|----|----------|----------|----------|
| H  | -0.29803 | 4.357219 | 1.314466 |
| C  | 1.514232 | 4.131084 | 0.034605 |
| H  | 1.906212 | 4.95164  | -0.57789 |
| H  | 2.076009 | 4.13096  | 0.975463 |
| H  | -1.66338 | 3.10541  | -0.67266 |
| H  | 2.581428 | 2.630906 | -1.2272  |
| C  | 1.573305 | 0.208177 | -0.21538 |
| H  | 1.128746 | -0.67144 | 0.744929 |
| H  | 1.19852  | 0.099711 | -1.24475 |
| C  | 3.016485 | -0.20405 | -0.22852 |
| C  | 3.59563  | -0.77759 | -1.37685 |
| C  | 3.843592 | -0.06316 | 0.903634 |
| C  | 4.929029 | -1.18632 | -1.39922 |
| H  | 2.986451 | -0.89232 | -2.27196 |
| C  | 5.179993 | -0.46061 | 0.880769 |
| H  | 3.432319 | 0.356273 | 1.817618 |
| C  | 5.734282 | -1.02735 | -0.26951 |
| H  | 5.342436 | -1.62119 | -2.30675 |
| H  | 5.79061  | -0.33414 | 1.77213  |
| H  | 6.774995 | -1.34044 | -0.28441 |
| Pd | -0.89688 | -0.13139 | 0.047519 |
| P  | -3.09172 | 0.508041 | 0.043122 |
| P  | -1.07843 | -2.57585 | -0.43977 |
| C  | -1.63712 | -3.61094 | 0.984675 |
| H  | -2.67691 | -3.38669 | 1.242774 |
| H  | -1.54686 | -4.68191 | 0.768135 |
| H  | -0.99228 | -3.34255 | 1.825097 |
| C  | 0.582097 | -3.29171 | -0.8036  |
| H  | 0.525778 | -4.37738 | -0.94685 |

|   |          |          |          |
|---|----------|----------|----------|
| H | 1.005143 | -2.83032 | -1.70096 |
| H | 1.221777 | -3.05099 | 0.049317 |
| C | -2.08964 | -3.24452 | -1.85169 |
| H | -1.98156 | -4.33157 | -1.94529 |
| H | -3.15204 | -3.0144  | -1.71722 |
| H | -1.75947 | -2.77952 | -2.78678 |
| C | -3.58282 | 1.81668  | 1.254149 |
| H | -3.36114 | 1.464757 | 2.266486 |
| H | -3.01572 | 2.733536 | 1.081703 |
| H | -4.65391 | 2.036433 | 1.1777   |
| C | -3.77762 | 1.134963 | -1.55722 |
| H | -3.70963 | 0.344418 | -2.311   |
| H | -4.82551 | 1.439492 | -1.45085 |
| H | -3.18948 | 1.987383 | -1.90794 |
| C | -4.31235 | -0.8144  | 0.478559 |
| H | -5.33514 | -0.41973 | 0.477196 |
| H | -4.25143 | -1.63798 | -0.23763 |
| H | -4.08415 | -1.20662 | 1.474209 |
| O | 0.698959 | -1.45272 | 1.675008 |
| C | 1.026579 | -1.0608  | 2.972677 |
| H | 1.993422 | -1.48252 | 3.308173 |
| H | 1.104773 | 0.039482 | 3.089201 |
| H | 0.265323 | -1.39458 | 3.701379 |

**TS1b**

|   |          |          |          |
|---|----------|----------|----------|
| C | 1.811893 | -0.47713 | 0.063559 |
| C | 2.954975 | 0.068786 | -0.8239  |
| C | 3.040039 | -2.15516 | -1.19381 |
| C | 1.820164 | -2.01319 | -0.23503 |

|    |          |          |          |
|----|----------|----------|----------|
| H  | 1.946658 | -0.29269 | 1.128904 |
| H  | 2.001465 | -2.55059 | 0.705088 |
| C  | 2.928929 | -0.87246 | -2.04415 |
| H  | 3.779286 | -0.72994 | -2.72258 |
| H  | 2.001896 | -0.80406 | -2.6243  |
| C  | 4.297224 | -0.34904 | -0.15637 |
| H  | 5.141912 | 0.151868 | -0.64684 |
| H  | 4.330131 | -0.08654 | 0.906156 |
| C  | 4.339098 | -1.89107 | -0.39748 |
| H  | 5.219481 | -2.17628 | -0.98524 |
| H  | 4.370044 | -2.46425 | 0.53544  |
| H  | 2.907483 | 1.135874 | -1.05477 |
| H  | 3.047124 | -3.10182 | -1.74476 |
| C  | 0.576969 | -2.65533 | -0.88121 |
| H  | 0.415318 | -2.20651 | -1.87225 |
| H  | 0.810248 | -3.71172 | -1.0768  |
| C  | -0.71927 | -2.58389 | -0.09921 |
| C  | -1.71468 | -3.53554 | -0.39448 |
| C  | -0.9763  | -1.57972 | 0.860041 |
| C  | -2.95442 | -3.50754 | 0.237961 |
| H  | -1.51024 | -4.30698 | -1.13544 |
| C  | -2.25179 | -1.56781 | 1.477993 |
| C  | -3.22867 | -2.51359 | 1.187872 |
| H  | -3.70215 | -4.26077 | 0.000356 |
| H  | -2.43611 | -0.8079  | 2.233645 |
| H  | -4.18672 | -2.49882 | 1.702997 |
| Pd | -0.10738 | 0.377926 | -0.20974 |
| P  | 0.760078 | 2.466086 | 0.401899 |
| P  | -2.34311 | 1.060322 | -1.06122 |

|   |          |          |          |
|---|----------|----------|----------|
| C | -2.38198 | 2.546309 | -2.17594 |
| H | -1.60565 | 2.444932 | -2.94118 |
| H | -3.35456 | 2.661823 | -2.66867 |
| H | -2.17371 | 3.455345 | -1.60188 |
| C | -3.81965 | 1.374765 | 0.014507 |
| H | -4.71139 | 1.599708 | -0.58242 |
| H | -4.00893 | 0.485959 | 0.622154 |
| H | -3.62203 | 2.213281 | 0.689464 |
| C | -2.99033 | -0.25131 | -2.19831 |
| H | -3.94593 | 0.041334 | -2.64961 |
| H | -2.2635  | -0.43511 | -2.99642 |
| H | -3.12313 | -1.18117 | -1.63792 |
| C | -0.54914 | 3.298626 | 1.406168 |
| H | -1.42999 | 3.526218 | 0.799314 |
| H | -0.82977 | 2.596329 | 2.19715  |
| H | -0.17567 | 4.226821 | 1.854462 |
| C | 2.115947 | 2.378553 | 1.641166 |
| H | 3.054397 | 2.063526 | 1.179439 |
| H | 2.259879 | 3.351259 | 2.125117 |
| H | 1.793178 | 1.62244  | 2.370926 |
| C | 1.29876  | 3.787935 | -0.78246 |
| H | 1.603206 | 4.699134 | -0.25407 |
| H | 2.143219 | 3.426352 | -1.3777  |
| H | 0.480166 | 4.030487 | -1.46764 |
| H | -0.2045  | -0.95536 | 1.598991 |
| O | 0.337039 | -0.11176 | 2.657199 |
| C | 0.071633 | -0.56874 | 3.935362 |
| H | -0.61556 | -1.4451  | 3.947529 |
| H | 0.979519 | -0.89927 | 4.48615  |



H -0.41294 0.194774 4.583375

**TS1a'**

C -0.67489 1.874992 0.439095

C -1.39169 3.012053 -0.31065

C 0.803364 3.394675 -0.7564

C 0.823662 2.122773 0.127967

H -0.91007 1.817586 1.50495

H 1.413114 2.282976 1.037761

C -0.50596 3.208405 -1.5606

H -0.77568 4.098226 -2.14285

H -0.50203 2.342633 -2.2311

C -1.08865 4.324472 0.471381

H -1.72105 5.143988 0.107118

H -1.28007 4.216916 1.544815

C 0.421934 4.587583 0.153171

H 0.552412 5.538273 -0.37664

H 1.040672 4.629998 1.056211

H -2.46005 2.870114 -0.5

H 1.715534 3.547598 -1.3417

C 1.261767 0.834019 -0.56763

H 0.721251 -0.30447 0.796555

H 0.94072 0.836753 -1.61521

C 2.69277 0.424284 -0.51912

C 3.326586 0.000573 -1.70476

C 3.482205 0.510193 0.64299

C 4.680391 -0.33002 -1.73253

H 2.745718 -0.0487 -2.62461

C 4.837417 0.181189 0.616324

|    |          |          |          |
|----|----------|----------|----------|
| H  | 3.028527 | 0.812891 | 1.57989  |
| C  | 5.445376 | -0.24284 | -0.56719 |
| H  | 5.139476 | -0.64617 | -2.66627 |
| H  | 5.419951 | 0.251957 | 1.531425 |
| H  | 6.501634 | -0.49836 | -0.58237 |
| Pd | -0.75232 | -0.14274 | -0.21143 |
| Br | 0.901691 | -1.08678 | 2.504998 |
| P  | -3.12794 | -0.19395 | -0.02021 |
| P  | -0.31848 | -2.50766 | -0.8866  |
| C  | -0.91444 | -3.82798 | 0.266176 |
| H  | -2.00636 | -3.84571 | 0.308887 |
| H  | -0.55686 | -4.81524 | -0.04891 |
| H  | -0.52805 | -3.60255 | 1.264882 |
| C  | 1.467561 | -2.95482 | -1.00848 |
| H  | 1.587783 | -4.01182 | -1.27323 |
| H  | 1.972344 | -2.33395 | -1.75198 |
| H  | 1.938433 | -2.76472 | -0.03969 |
| C  | -0.97357 | -3.08287 | -2.52621 |
| H  | -0.68943 | -4.12064 | -2.73612 |
| H  | -2.06608 | -3.00776 | -2.54432 |
| H  | -0.57908 | -2.44139 | -3.32106 |
| C  | -3.77791 | 0.768355 | 1.416727 |
| H  | -3.34561 | 0.362438 | 2.336555 |
| H  | -3.47677 | 1.815307 | 1.335769 |
| H  | -4.87079 | 0.709813 | 1.472982 |
| C  | -4.07873 | 0.485625 | -1.45709 |
| H  | -3.8916  | -0.13543 | -2.33898 |
| H  | -5.1559  | 0.500473 | -1.25402 |
| H  | -3.74246 | 1.500944 | -1.6827  |

|   |          |          |          |
|---|----------|----------|----------|
| C | -3.99119 | -1.81319 | 0.238318 |
| H | -5.07059 | -1.6649  | 0.359108 |
| H | -3.82325 | -2.47491 | -0.61706 |
| H | -3.59809 | -2.29963 | 1.135723 |

**TS1b'**

|   |          |          |          |
|---|----------|----------|----------|
| C | 1.780042 | -0.49742 | -0.11416 |
| C | 2.898373 | 0.231344 | -0.91449 |
| C | 3.193468 | -1.92878 | -1.48385 |
| C | 1.918248 | -1.97667 | -0.59371 |
| H | 1.965727 | -0.4239  | 0.959312 |
| H | 2.071803 | -2.63748 | 0.26933  |
| C | 3.009146 | -0.58426 | -2.21605 |
| H | 3.875407 | -0.30309 | -2.82794 |
| H | 2.110869 | -0.53587 | -2.84001 |
| C | 4.250489 | -0.12685 | -0.23478 |
| H | 5.064586 | 0.476995 | -0.65672 |
| H | 4.234544 | 0.049849 | 0.845854 |
| C | 4.425705 | -1.63675 | -0.59529 |
| H | 5.355606 | -1.80624 | -1.15041 |
| H | 4.452218 | -2.28156 | 0.289936 |
| H | 2.762057 | 1.305043 | -1.05588 |
| H | 3.308943 | -2.81481 | -2.11728 |
| C | 0.744631 | -2.56125 | -1.4076  |
| H | 0.590072 | -1.94694 | -2.30485 |
| H | 1.033377 | -3.55905 | -1.76442 |
| C | -0.55459 | -2.65639 | -0.65246 |
| C | -1.29397 | -3.84907 | -0.71324 |
| C | -1.05892 | -1.55134 | 0.063934 |

|    |          |          |          |
|----|----------|----------|----------|
| C  | -2.53438 | -3.96753 | -0.09018 |
| H  | -0.89126 | -4.69357 | -1.26952 |
| C  | -2.31921 | -1.69644 | 0.685737 |
| C  | -3.05172 | -2.88017 | 0.618062 |
| H  | -3.08795 | -4.90139 | -0.14929 |
| H  | -2.70466 | -0.88093 | 1.292685 |
| H  | -4.00718 | -2.96057 | 1.131184 |
| Pd | -0.17283 | 0.379148 | -0.27009 |
| P  | 0.697377 | 2.574976 | 0.293941 |
| P  | -2.36938 | 1.182859 | -1.17993 |
| C  | -2.28991 | 2.698637 | -2.2531  |
| H  | -1.50525 | 2.569374 | -3.00565 |
| H  | -3.24286 | 2.877906 | -2.76432 |
| H  | -2.04599 | 3.582029 | -1.65496 |
| C  | -3.8615  | 1.561512 | -0.14243 |
| H  | -4.71375 | 1.862636 | -0.76291 |
| H  | -4.13975 | 0.674547 | 0.433136 |
| H  | -3.63352 | 2.365686 | 0.563966 |
| C  | -3.06112 | -0.03769 | -2.38889 |
| H  | -3.98038 | 0.337442 | -2.85389 |
| H  | -2.32144 | -0.23501 | -3.17153 |
| H  | -3.26865 | -0.97907 | -1.87408 |
| C  | -0.5892  | 3.494834 | 1.260863 |
| H  | -1.45626 | 3.727902 | 0.63592  |
| H  | -0.91889 | 2.858495 | 2.08789  |
| H  | -0.18688 | 4.430427 | 1.666175 |
| C  | 2.070789 | 2.561187 | 1.532184 |
| H  | 2.994559 | 2.187074 | 1.085667 |
| H  | 2.246748 | 3.568935 | 1.92563  |

|    |          |          |          |
|----|----------|----------|----------|
| H  | 1.786728 | 1.892109 | 2.350343 |
| C  | 1.265374 | 3.866742 | -0.91348 |
| H  | 1.57655  | 4.784101 | -0.40014 |
| H  | 2.109889 | 3.48511  | -1.49564 |
| H  | 0.456673 | 4.107639 | -1.61019 |
| H  | -0.33441 | -0.86539 | 1.395433 |
| Br | -0.06221 | -0.56882 | 3.080822 |

**IN2a**

|   |          |          |          |
|---|----------|----------|----------|
| C | -1.18613 | 1.57895  | 0.431037 |
| C | -2.32869 | 2.099289 | -0.46156 |
| C | -0.52966 | 3.303584 | -1.13755 |
| C | 0.045927 | 2.39585  | -0.02636 |
| H | -1.40353 | 1.624571 | 1.503322 |
| H | 0.509935 | 3.004778 | 0.762525 |
| C | -1.59905 | 2.397206 | -1.7911  |
| H | -2.22568 | 2.934384 | -2.51483 |
| H | -1.19063 | 1.500068 | -2.2669  |
| C | -2.67022 | 3.540476 | 0.013321 |
| H | -3.59176 | 3.902425 | -0.46133 |
| H | -2.82227 | 3.589941 | 1.097781 |
| C | -1.4264  | 4.367613 | -0.4571  |
| H | -1.71884 | 5.144135 | -1.17402 |
| H | -0.91347 | 4.867192 | 0.372715 |
| H | -3.20792 | 1.449754 | -0.54076 |
| H | 0.229429 | 3.721729 | -1.8082  |
| C | 0.988624 | 1.274516 | -0.5056  |
| H | 1.149745 | 1.300373 | -1.58803 |
| C | 2.268409 | 1.106256 | 0.224295 |

|    |          |          |          |
|----|----------|----------|----------|
| C  | 3.484492 | 0.939822 | -0.47305 |
| C  | 2.346924 | 1.131191 | 1.635551 |
| C  | 4.70162  | 0.78421  | 0.193263 |
| H  | 3.47325  | 0.961618 | -1.56119 |
| C  | 3.561029 | 0.983873 | 2.302026 |
| H  | 1.433148 | 1.252014 | 2.211261 |
| C  | 4.750578 | 0.801109 | 1.588403 |
| H  | 5.616669 | 0.663611 | -0.38278 |
| H  | 3.579802 | 1.007097 | 3.389551 |
| H  | 5.696244 | 0.683376 | 2.110704 |
| Pd | -0.4011  | -0.31111 | -0.05986 |
| P  | -2.28243 | -1.53677 | 0.831064 |
| P  | 0.956109 | -2.15606 | -0.95881 |
| C  | 0.193857 | -3.79199 | -1.41475 |
| H  | -0.62405 | -3.63119 | -2.12532 |
| H  | 0.927427 | -4.46734 | -1.87136 |
| H  | -0.21789 | -4.27958 | -0.52573 |
| C  | 2.384983 | -2.70475 | 0.085092 |
| H  | 2.983989 | -3.47485 | -0.4158  |
| H  | 3.01813  | -1.84003 | 0.303113 |
| H  | 2.013958 | -3.1038  | 1.034784 |
| C  | 1.798148 | -1.74984 | -2.55892 |
| H  | 2.417865 | -2.58226 | -2.9129  |
| H  | 1.046325 | -1.51482 | -3.31928 |
| H  | 2.430615 | -0.87015 | -2.41923 |
| C  | -3.36141 | -0.57699 | 1.991696 |
| H  | -2.77386 | -0.26824 | 2.862122 |
| H  | -3.72518 | 0.327153 | 1.496718 |
| H  | -4.21751 | -1.17097 | 2.332556 |

|   |          |          |          |
|---|----------|----------|----------|
| C | -3.5383  | -2.17545 | -0.37861 |
| H | -3.06622 | -2.89285 | -1.05741 |
| H | -4.38221 | -2.6637  | 0.123427 |
| H | -3.91522 | -1.34185 | -0.97964 |
| C | -1.96907 | -3.04841 | 1.865904 |
| H | -2.89879 | -3.45868 | 2.277664 |
| H | -1.47985 | -3.82253 | 1.267689 |
| H | -1.30025 | -2.78713 | 2.692358 |

### **IN2b**

|   |          |          |          |
|---|----------|----------|----------|
| C | 1.796875 | 0.181024 | -0.40734 |
| C | 2.743316 | -0.85866 | 0.260561 |
| C | 3.539644 | 1.09294  | 1.056693 |
| C | 2.34295  | 1.538009 | 0.172786 |
| H | 1.9172   | 0.159747 | -1.49628 |
| H | 2.702415 | 2.178585 | -0.64498 |
| C | 3.02673  | -0.2376  | 1.641545 |
| H | 3.789031 | -0.77992 | 2.215949 |
| H | 2.127412 | -0.13085 | 2.257525 |
| C | 4.142895 | -0.75182 | -0.4076  |
| H | 4.788242 | -1.58577 | -0.10028 |
| H | 4.079543 | -0.77311 | -1.50157 |
| C | 4.685487 | 0.608079 | 0.138757 |
| H | 5.610334 | 0.463486 | 0.710112 |
| H | 4.903579 | 1.328892 | -0.65729 |
| H | 2.371745 | -1.88417 | 0.289433 |
| H | 3.849397 | 1.853999 | 1.781453 |
| C | 1.332282 | 2.386447 | 0.975071 |
| H | 0.9737   | 1.807518 | 1.837242 |

|    |          |          |          |
|----|----------|----------|----------|
| H  | 1.839835 | 3.277197 | 1.370989 |
| C  | 0.17757  | 2.782093 | 0.093714 |
| C  | -0.09222 | 4.127167 | -0.19491 |
| C  | -0.57422 | 1.764704 | -0.5153  |
| C  | -1.09216 | 4.481608 | -1.10361 |
| H  | 0.493111 | 4.905754 | 0.292396 |
| C  | -1.56232 | 2.133941 | -1.44288 |
| C  | -1.82055 | 3.478347 | -1.7423  |
| H  | -1.29017 | 5.529215 | -1.3179  |
| H  | -2.14222 | 1.367068 | -1.95447 |
| H  | -2.58604 | 3.735533 | -2.472   |
| Pd | -0.28595 | -0.2386  | -0.1288  |
| P  | -0.08573 | -2.65984 | -0.5853  |
| P  | -2.56303 | -0.30205 | 0.832502 |
| C  | -2.88808 | -1.64792 | 2.074217 |
| H  | -2.10131 | -1.63153 | 2.835725 |
| H  | -3.85853 | -1.51989 | 2.56817  |
| H  | -2.8696  | -2.63019 | 1.591842 |
| C  | -4.11072 | -0.37108 | -0.19313 |
| H  | -5.01251 | -0.33154 | 0.429368 |
| H  | -4.11924 | 0.479905 | -0.88063 |
| H  | -4.12876 | -1.29041 | -0.78705 |
| C  | -2.89407 | 1.191869 | 1.873503 |
| H  | -3.87164 | 1.131097 | 2.366269 |
| H  | -2.11197 | 1.280776 | 2.633894 |
| H  | -2.85181 | 2.084522 | 1.244734 |
| C  | -1.6536  | -3.36816 | -1.2904  |
| H  | -2.44137 | -3.39084 | -0.53148 |
| H  | -1.99511 | -2.73531 | -2.11574 |



|   |          |          |          |
|---|----------|----------|----------|
| H | -1.50125 | -4.38723 | -1.66475 |
| C | 1.067562 | -3.06052 | -1.98403 |
| H | 2.096218 | -2.80503 | -1.72004 |
| H | 1.018102 | -4.12327 | -2.24901 |
| H | 0.785652 | -2.46191 | -2.85605 |
| C | 0.35022  | -3.97362 | 0.656899 |
| H | 0.356905 | -4.97475 | 0.209418 |
| H | 1.336902 | -3.76963 | 1.083792 |
| H | -0.37821 | -3.9553  | 1.474366 |

**TS2a**

|   |          |          |          |
|---|----------|----------|----------|
| C | -1.92734 | -0.41841 | 0.405703 |
| C | -2.46407 | -1.68405 | -0.27185 |
| C | -3.67833 | 0.000491 | -1.19268 |
| C | -2.75349 | 0.701006 | -0.18324 |
| H | -1.7986  | -0.42134 | 1.483683 |
| H | -3.26218 | 1.39718  | 0.488492 |
| C | -2.81583 | -1.18304 | -1.68923 |
| H | -3.40203 | -1.91173 | -2.26152 |
| H | -1.9398  | -0.8993  | -2.27714 |
| C | -3.89234 | -1.90474 | 0.315304 |
| H | -4.27567 | -2.89166 | 0.028508 |
| H | -3.89963 | -1.8598  | 1.410113 |
| C | -4.73089 | -0.7537  | -0.33985 |
| H | -5.5294  | -1.15585 | -0.97397 |
| H | -5.20263 | -0.10057 | 0.403026 |
| H | -1.81467 | -2.56031 | -0.21522 |
| H | -4.10007 | 0.654043 | -1.96359 |
| C | -1.37355 | 1.089183 | -0.61478 |

|    |          |          |          |
|----|----------|----------|----------|
| Pd | 0.378527 | -0.43773 | -0.0662  |
| P  | 1.290344 | -1.40127 | 1.915979 |
| P  | 1.894199 | -0.41482 | -1.91551 |
| C  | 2.658425 | -2.05445 | -2.35841 |
| H  | 1.869027 | -2.76415 | -2.62744 |
| H  | 3.364036 | -1.97403 | -3.19511 |
| H  | 3.184075 | -2.45656 | -1.48645 |
| C  | 3.432001 | 0.62312  | -1.75079 |
| H  | 4.072481 | 0.566562 | -2.64022 |
| H  | 3.148808 | 1.666241 | -1.57699 |
| H  | 4.003628 | 0.28584  | -0.87965 |
| C  | 1.344809 | 0.11999  | -3.61934 |
| H  | 2.152112 | 0.057369 | -4.36035 |
| H  | 0.514932 | -0.51466 | -3.9493  |
| H  | 0.982467 | 1.153244 | -3.58583 |
| C  | 2.416387 | -0.22931 | 2.82139  |
| H  | 3.244254 | 0.052789 | 2.163028 |
| H  | 1.864741 | 0.683342 | 3.067856 |
| H  | 2.823225 | -0.66648 | 3.742204 |
| C  | 0.181607 | -1.92841 | 3.321918 |
| H  | -0.47585 | -2.73799 | 2.986419 |
| H  | 0.747358 | -2.27403 | 4.196479 |
| H  | -0.45134 | -1.0871  | 3.625218 |
| C  | 2.389084 | -2.90377 | 1.831502 |
| H  | 2.788102 | -3.1869  | 2.814112 |
| H  | 1.824123 | -3.74829 | 1.422585 |
| H  | 3.226253 | -2.70232 | 1.154592 |
| C  | -0.6812  | 2.212211 | 0.059406 |
| C  | 0.217626 | 3.013522 | -0.6753  |

|   |          |          |          |
|---|----------|----------|----------|
| C | -0.92338 | 2.573934 | 1.400323 |
| C | 0.848233 | 4.113817 | -0.10024 |
| H | 0.408415 | 2.767294 | -1.71715 |
| C | -0.28468 | 3.671408 | 1.978008 |
| H | -1.61372 | 1.987957 | 2.000223 |
| C | 0.606411 | 4.448796 | 1.235452 |
| H | 1.527209 | 4.716554 | -0.6989  |
| H | -0.49153 | 3.923544 | 3.015495 |
| H | 1.098646 | 5.305998 | 1.686566 |
| H | -1.18402 | 1.026464 | -1.68151 |

**P**

|   |          |          |          |
|---|----------|----------|----------|
| C | 0.930845 | -0.76179 | -0.23389 |
| C | 2.324891 | -1.1369  | 0.282372 |
| C | 2.324922 | 1.13658  | 0.283468 |
| C | 0.93087  | 0.762015 | -0.23316 |
| H | 0.532153 | -1.3142  | -1.08187 |
| H | 0.532199 | 1.315246 | -1.08061 |
| C | 2.654867 | -0.00064 | 1.27568  |
| H | 3.711144 | -0.00079 | 1.567764 |
| H | 2.055225 | -0.00107 | 2.18925  |
| C | 3.302889 | -0.7845  | -0.87513 |
| H | 4.304576 | -1.18081 | -0.67215 |
| H | 2.973075 | -1.20373 | -1.83193 |
| C | 3.302919 | 0.785266 | -0.87437 |
| H | 4.304621 | 1.181337 | -0.671   |
| H | 2.973131 | 1.205438 | -1.83076 |
| H | 2.428107 | -2.15681 | 0.665725 |
| H | 2.428168 | 2.156115 | 0.667805 |

|   |          |          |          |
|---|----------|----------|----------|
| C | -0.04369 | -0.00028 | 0.639492 |
| H | 0.124764 | -0.00082 | 1.715613 |
| C | -1.50228 | -0.0001  | 0.276007 |
| C | -2.20509 | 1.203942 | 0.126906 |
| C | -2.20534 | -1.20401 | 0.126964 |
| C | -3.57067 | 1.206582 | -0.16215 |
| H | -1.67224 | 2.145086 | 0.238687 |
| C | -3.57092 | -1.20638 | -0.16208 |
| H | -1.67268 | -2.14526 | 0.238778 |
| C | -4.25868 | 0.00017  | -0.30819 |
| H | -4.09682 | 2.151147 | -0.27551 |
| H | -4.09727 | -2.15084 | -0.27539 |
| H | -5.32139 | 0.000275 | -0.53602 |

**Pd(PMe<sub>3</sub>)<sub>2</sub>**

|    |          |          |          |
|----|----------|----------|----------|
| Pd | -3E-06   | 0.004664 | -0.01432 |
| P  | -2.31619 | -0.00071 | 0.001036 |
| P  | 2.316188 | -0.0007  | 0.00102  |
| C  | 3.171576 | -1.38833 | -0.88935 |
| H  | 2.876481 | -1.38024 | -1.94334 |
| H  | 4.264156 | -1.30963 | -0.82205 |
| H  | 2.854582 | -2.34427 | -0.46077 |
| C  | 3.179517 | 1.468856 | -0.73775 |
| H  | 4.271489 | 1.377479 | -0.68036 |
| H  | 2.884276 | 1.574925 | -1.78643 |
| H  | 2.868272 | 2.375615 | -0.20979 |
| C  | 3.146431 | -0.09088 | 1.660059 |
| H  | 2.828511 | -1.00228 | 2.176081 |
| H  | 4.240419 | -0.09004 | 1.57446  |

|   |          |          |          |
|---|----------|----------|----------|
| H | 2.834466 | 0.763735 | 2.268572 |
| C | -3.17156 | -1.38881 | -0.88866 |
| H | -4.26414 | -1.3101  | -0.82138 |
| H | -2.87649 | -1.38122 | -1.94267 |
| H | -2.85454 | -2.34454 | -0.45964 |
| C | -3.1795  | 1.468458 | -0.73852 |
| H | -2.88424 | 1.573951 | -1.78726 |
| H | -4.27147 | 1.37713  | -0.6811  |
| H | -2.86825 | 2.3755   | -0.21105 |
| C | -3.14645 | -0.08998 | 1.660114 |
| H | -2.83446 | 0.764941 | 2.268181 |
| H | -4.24044 | -0.08915 | 1.574513 |
| H | -2.82856 | -1.00112 | 2.176616 |

#### NaOMe

|    |          |          |          |
|----|----------|----------|----------|
| Na | 1.660314 | -0.00025 | 0.000016 |
| O  | -0.27096 | 0.000856 | -4.8E-05 |
| C  | -1.64014 | -0.00036 | 0.000019 |
| H  | -2.08574 | 1.017578 | -0.08194 |
| H  | -2.08452 | -0.58076 | -0.84072 |
| H  | -2.08465 | -0.43878 | 0.922747 |

#### NaBr

|    |   |   |          |
|----|---|---|----------|
| Br | 0 | 0 | 0.607751 |
| Na | 0 | 0 | -1.93375 |

#### MeOH

|   |          |          |          |
|---|----------|----------|----------|
| O | 0.748584 | 0.122507 | 0.000003 |
| C | -0.66189 | -0.01969 | 0.000002 |

|   |          |          |          |
|---|----------|----------|----------|
| H | -1.07986 | 0.990833 | -0.00087 |
| H | -1.03666 | -0.54449 | -0.89287 |
| H | -1.0368  | -0.54301 | 0.893688 |
| H | 1.13596  | -0.76527 | 0.000015 |

### 3.3 Experimental Characterization of Products

#### *N*-(4-methylphenyl)-3-*exo*-phenyltricyclo[3.2.1.0<sup>2,4</sup>]octane-6,7-*endo*-dicarboximide

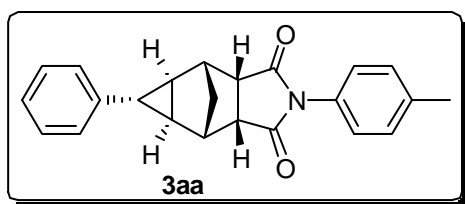

**e (3aa):** The title compound was prepared according to the general procedure and purified by flash column chromatography on silica gel with a gradient eluent of petroleum

ether/EtOAc (10/1→3/1) to give white solid, 156.1 mg, 91 % yield. **Mp:** 257-259 °C;

**<sup>1</sup>H NMR** (400 MHz, CDCl<sub>3</sub>) δ 7.30 (d, *J* = 8.0 Hz, 2H), 7.16-7.21 (t, *J* = 7.6 Hz, 2H), 7.15 (d, *J* = 7.6 Hz, 2H), 6.98 (d, *J* = 7.6 Hz, 2H), 3.29 (s, 2H), 3.12 (s, 2H), 2.39 (s, 3H), 2.10 (s, 1H), 1.61 (d, *J* = 11.2 Hz, 1H), 1.33 (s, 2H), 1.20 (d, *J* = 11.2 Hz, 1H);

**<sup>13</sup>C NMR** (100 MHz, CDCl<sub>3</sub>) δ 177.6, 141.2, 139.5, 130.7, 130.0, 129.1, 127.0, 126.8, 126.7, 49.9, 40.1, 32.5, 23.0, 21.9, 18.0; **HRMS (EI)** calcd. for C<sub>23</sub>H<sub>21</sub>NO<sub>2</sub> [M<sup>+</sup>]: 343.1572, found: 343.1569. The configuration was confirmed by X-ray analysis (Figure S1) and undoubtedly determined that methylenecyclopropane moiety was formed

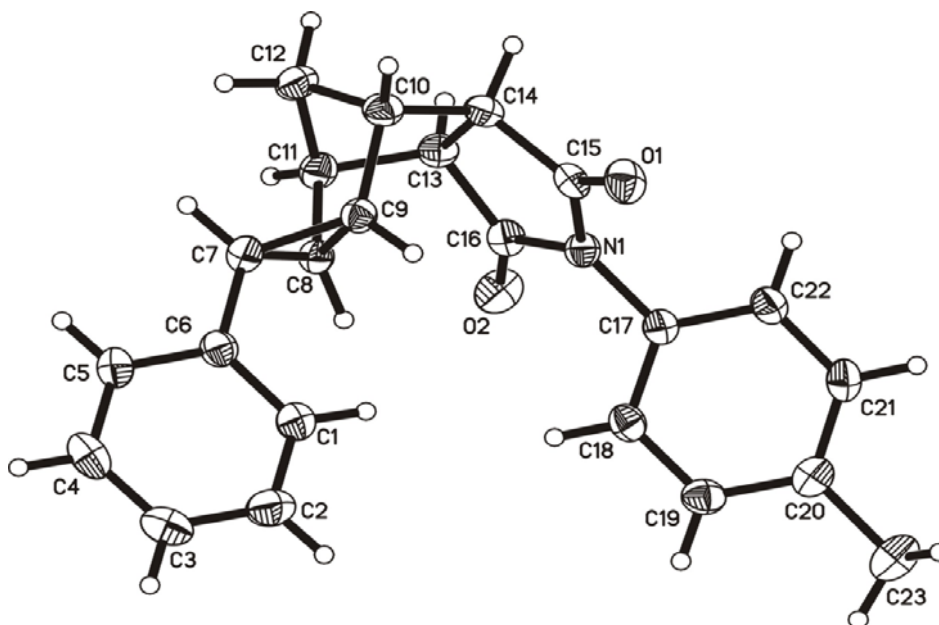

Figure S1. ORTEP drawing of product **3aa**

***N*-(4-methylphenyl)-3-*exo*-(4-methylphenyl)tricyclo[3.2.1.0<sup>2,4</sup>]octane-6,7-*endo*-dic**

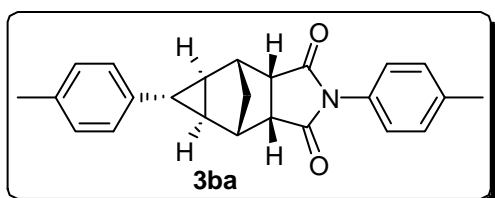

**arboximide (3ba):** The title compound was prepared according to the general procedure and purified by flash column chromatography on silica gel with a gradient eluent of

petroleum ether/EtOAc (10/1→3/1) to give white solid, 169.7 mg, 95 % yield. **Mp:** 195-197 °C; **<sup>1</sup>H NMR** (400 MHz, CDCl<sub>3</sub>) δ 7.29 (d, *J* = 7.6 Hz, 2H), 7.14 (d, *J* = 8.0 Hz, 2H), 7.03 (d, *J* = 8.0 Hz, 2H), 6.87 (d, *J* = 8.0 Hz, 2H), 3.26 (s, 2H), 3.10 (s, 2H), 2.38 (s, 3H), 2.80 (s, 3H), 2.07 (s, 1H), 1.58 (d, *J* = 11.6 Hz, 1H), 1.28 (s, 2H), 1.18 (d, *J* = 12.4 Hz, 1H); **<sup>13</sup>C NMR** (100 MHz, CDCl<sub>3</sub>) δ 177.6, 139.5, 138.0, 136.3, 135.3, 130.6, 129.8, 127.0, 126.7, 50.0, 40.1, 32.5, 22.8, 21.9, 21.6, 17.6; **HRMS (EI)** calcd. for C<sub>24</sub>H<sub>23</sub>NO<sub>2</sub> [M<sup>+</sup>]: 357.1729, found: 357.1726.

***N*-(4-methylphenyl)-3-*exo*-(3-methylphenyl)tricyclo[3.2.1.0<sup>2,4</sup>]octane-6,7-*endo*-dic**

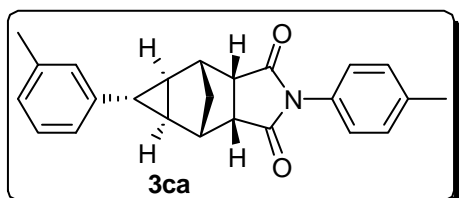

**arboximide (3ca):** The title compound was prepared according to the general procedure and purified by flash column chromatography on silica gel with a gradient eluent of petroleum

ether/EtOAc (10/1→3/1) to give white solid, 166.0 mg, 93 % yield. **Mp:** 200-203 °C; **<sup>1</sup>H NMR** (400 MHz, CDCl<sub>3</sub>) δ 7.29 (d, *J* = 7.6 Hz, 2H), 7.08-7.16 (m, 3H), 6.96 (d, *J*

= 6.8 Hz, 1H), 6.78 (d,  $J = 7.2$  Hz, 2H), 3.26 (s, 2H), 3.10 (s, 2H), 2.38 (s, 3H), 2.27 (s, 3H), 2.06 (s, 1H), 1.57 (d,  $J = 11.2$  Hz, 1H), 1.30 (s, 2H), 1.18 (d,  $J = 11.2$  Hz, 1H);  $^{13}\text{C}$  NMR (100 MHz,  $\text{CDCl}_3$ )  $\delta$  177.7, 141.2, 139.5, 138.6, 135.3, 130.6, 129.0, 127.5, 127.1, 127.1, 123.9, 50.0, 40.1, 32.5, 23.1, 22.1, 21.9, 17.9; HRMS (EI) calcd. for  $\text{C}_{24}\text{H}_{23}\text{NO}_2$  [ $\text{M}^+$ ]: 357.1729, found: 357.1727.

***N*-(4-methylphenyl)-3-*exo*-(4-methoxyphenyl)tricyclo[3.2.1.0<sup>2,4</sup>]octane-6,7-*endo*-d**

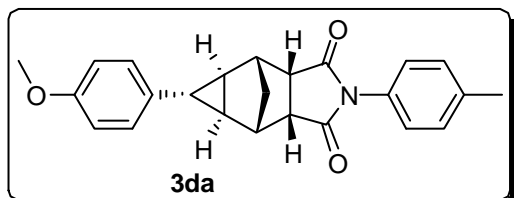

**icarboximide (3da):** The title compound was prepared according to the general procedure and purified by flash column chromatography on silica gel with a

gradient eluent of petroleum ether/EtOAc (10/1  $\rightarrow$  3/1) to give white solid, 153.0 mg, 82 % yield. **Mp:** 189-192 °C;  $^1\text{H}$  NMR (400 MHz,  $\text{CDCl}_3$ )  $\delta$  7.29 (d,  $J = 7.2$  Hz, 2H), 7.13 (d,  $J = 8.0$  Hz, 2H), 6.91 (d,  $J = 8.4$  Hz, 2H), 6.77 (d,  $J = 8.4$  Hz, 2H), 3.76 (s, 3H), 3.27 (s, 2H), 3.10 (s, 2H), 2.38 (s, 3H), 2.06 (s, 1H), 1.57 (d,  $J = 11.6$  Hz, 1H), 1.25 (s, 2H), 1.17 (d,  $J = 11.2$  Hz, 1H);  $^{13}\text{C}$  NMR (100 MHz,  $\text{CDCl}_3$ )  $\delta$  177.7, 158.7, 139.4, 130.6, 130.2, 127.9, 127.1, 127.0, 114.5, 55.9, 50.0, 40.1, 32.5, 22.5, 21.9, 17.3; HRMS (EI) calcd. for  $\text{C}_{24}\text{H}_{23}\text{NO}_3$  [ $\text{M}^+$ ]: 373.1678, found: 373.1680.

***N*-(4-methylphenyl)-3-*exo*-(4-fluorophenyl)tricyclo[3.2.1.0<sup>2,4</sup>]octane-6,7-*endo*-dica**

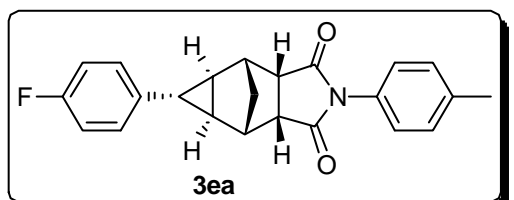

**rboximide (3ea):** The title compound was prepared according to the general procedure and purified by flash column chromatography on silica gel with a gradient

eluent of petroleum ether/EtOAc (10/1  $\rightarrow$  3/1) to give white solid, 155.3 mg, 86 % yield. **Mp:** 232-235 °C;  $^1\text{H}$  NMR (400 MHz,  $\text{CDCl}_3$ )  $\delta$  7.31 (d,  $J = 7.6$  Hz, 2H), 7.14 (d,  $J = 8.0$  Hz, 2H), 6.94 (d,  $J = 8.4$  Hz, 4H), 3.30 (s, 2H), 3.14 (s, 2H), 2.41 (s, 3H), 2.11 (s, 1H), 1.59 (d,  $J = 11.2$  Hz, 1H), 1.29 (s, 2H), 1.22 (d,  $J = 11.2$  Hz, 1H);  $^{13}\text{C}$  NMR (100 MHz,  $\text{CDCl}_3$ )  $\delta$  177.5, 162.0 (d,  $J_{\text{C-F}} = 242.0$  Hz), 139.5, 136.7 (d,  $J_{\text{C-F}} = 3.4$  Hz), 130.6, 130.0, 128.3 (d,  $J_{\text{C-F}} = 7.7$  Hz), 126.9, 115.9 (d,  $J_{\text{C-F}} = 21.5$  Hz), 49.9, 40.1, 32.5, 22.8, 21.9, 17.3; HRMS (EI) calcd. for  $\text{C}_{23}\text{H}_{20}\text{FNO}_2$  [ $\text{M}^+$ ]: 361.1478, found: 361.1480.



***N*-(4-methylphenyl)-3-*exo*-(4-chlorophenyl)tricyclo[3.2.1.0<sup>2,4</sup>]octane-6,7-*endo*-dic**

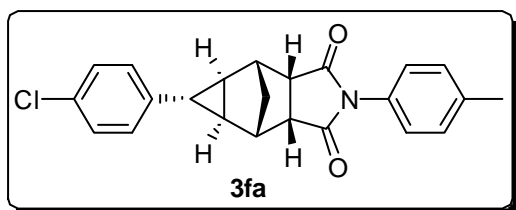

**arboximide (3fa):** The title compound was prepared according to the general procedure and purified by flash column chromatography on silica gel with a

gradient eluent of petroleum ether/EtOAc (10/1→3/1) to give white solid, 156.5 mg, 83 % yield. **Mp:** 226-229 °C; **<sup>1</sup>H NMR** (400 MHz, CDCl<sub>3</sub>) δ 7.29 (d, *J* = 8.4 Hz, 2H), 7.19 (d, *J* = 8.4 Hz, 2H), 7.12 (d, *J* = 8.4 Hz, 2H), 6.90 (d, *J* = 8.4 Hz, 2H), 3.28 (s, 2H), 3.11 (s, 2H), 2.39 (s, 3H), 2.07 (s, 1H), 1.56 (d, *J* = 11.6 Hz, 1H), 1.28 (s, 2H), 1.20 (d, *J* = 10.4 Hz, 1H); **<sup>13</sup>C NMR** (100 MHz, CDCl<sub>3</sub>) δ 176.8, 139.1, 138.9, 131.7, 130.0, 129.3, 128.5, 127.5, 126.3, 49.2, 39.4, 31.8, 22.4, 21.3, 16.9; **HRMS (EI)** calcd. for C<sub>23</sub>H<sub>20</sub>ClNO<sub>2</sub> [M<sup>+</sup>]: 377.1183, found: 377.1181.

***N*-(4-methylphenyl)-3-*exo*-(3-chlorophenyl)tricyclo[3.2.1.0<sup>2,4</sup>]octane-6,7-*endo*-dic**

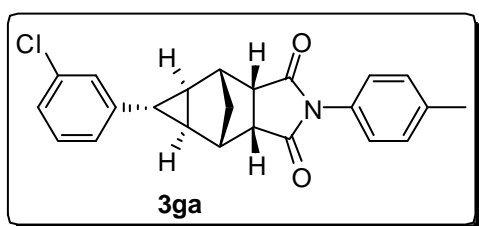

**arboximide (3ga):** The title compound was prepared according to the general procedure and purified by flash column chromatography on silica gel with a gradient eluent of

petroleum ether/EtOAc (10/1→3/1) to give white solid, 147.1 mg, 78 % yield. **Mp:** 227-230 °C; **<sup>1</sup>H NMR** (400 MHz, CDCl<sub>3</sub>) δ 7.33 (d, *J* = 7.6 Hz, 2H), 7.16 (d, *J* = 6.8 Hz, 4H), 6.98 (s, 1H), 6.89 (s, 1H), 3.31 (s, 2H), 3.14 (s, 2H), 2.41 (s, 3H), 2.09 (s, 1H), 1.58 (d, *J* = 10.8 Hz, 1H), 1.33 (s, 2H), 1.22 (d, *J* = 10.4 Hz, 1H); **<sup>13</sup>C NMR** (100 MHz, CDCl<sub>3</sub>) δ 177.5, 143.5, 139.6, 134.9, 130.7, 130.3, 129.9, 127.0, 126.9, 125.0, 49.8, 40.1, 32.5, 23.3, 21.9, 17.7; **HRMS (EI)** calcd. for C<sub>23</sub>H<sub>20</sub>ClNO<sub>2</sub> [M<sup>+</sup>]: 377.1183, found: 377.1180.

***N*-(4-methylphenyl)-3-*exo*-(1-naphthalenyl)tricyclo[3.2.1.0<sup>2,4</sup>]octane-6,7-*endo*-dic**

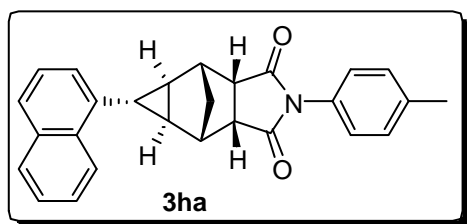

**arboximide (3ha):** The title compound was prepared according to the general procedure and purified by flash column chromatography on silica gel with a gradient eluent of petroleum

ether/EtOAc (10/1→3/1) to give white solid, 167.1 mg, 85 % yield. **Mp**: 246-249 °C; **<sup>1</sup>H NMR** (400 MHz, CDCl<sub>3</sub>) δ 8.19 (d, *J* = 8.0 Hz, 1H), 7.84 (d, *J* = 7.6 Hz, 1H), 7.71 (d, *J* = 8.4 Hz, 1H), 7.47-7.55 (m, 2H), 7.34 (t, *J* = 8.0 Hz, 1H), 7.23 (d, *J* = 7.2 Hz, 1H), 7.17 (d, *J* = 8.0 Hz, 2H), 6.98 (d, *J* = 8.0 Hz, 2H), 3.32 (s, 2H), 3.27 (s, 2H), 2.52 (s, 1H), 2.31 (s, 3H), 1.73 (d, *J* = 11.2 Hz, 1H), 1.48 (s, 2H), 1.31 (d, *J* = 11.2 Hz, 1H); **<sup>13</sup>C NMR** (100 MHz, CDCl<sub>3</sub>) δ 177.0, 138.7, 135.5, 133.6, 133.0, 129.8, 129.2, 128.6, 127.2, 126.4, 126.0, 125.8, 125.5, 124.7, 124.0, 49.4, 39.4, 32.2, 21.2, 19.8, 15.3; **HRMS (EI)** calcd. for C<sub>27</sub>H<sub>23</sub>NO<sub>2</sub> [M<sup>+</sup>]: 393.1729, found: 393.1731.

***N*-isobutyl-3-*exo*-(4-methylphenyl)tricyclo[3.2.1.0<sup>2,4</sup>]octane-6,7-*endo*-dicarboximide (3bb)**

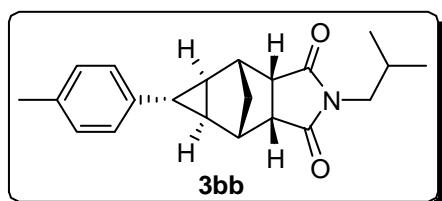

**de (3bb)**: The title compound was prepared according to the general procedure and purified by flash column chromatography on silica gel with a gradient eluent of petroleum ether/EtOAc

(10/1→3/1) to give light yellow sticky oil, 145.4 mg, 90 % yield. **Mp**: 137-139 °C; **<sup>1</sup>H NMR** (400 MHz, CDCl<sub>3</sub>) δ 7.03 (d, *J* = 8.0 Hz, 2H), 6.87 (d, *J* = 8.0 Hz, 2H), 3.34 (d, *J* = 6.8 Hz, 2H), 3.13 (s, 2H), 3.02 (s, 2H), 2.29 (s, 3H), 2.00-2.10 (m, 2H), 1.56 (d, *J* = 11.6 Hz, 1H), 1.15 (s, 2H), 1.13 (s, 1H), 0.94 (d, *J* = 6.8 Hz, 6H); **<sup>13</sup>C NMR** (100 MHz, CDCl<sub>3</sub>) δ 178.6, 138.0, 136.2, 129.6, 126.9, 49.9, 46.8, 39.5, 32.6, 28.1, 22.4, 21.6, 21.1, 17.7; **HRMS (EI)** calcd. for C<sub>21</sub>H<sub>25</sub>NO<sub>2</sub> [M<sup>+</sup>]: 323.1885, found: 323.1886.

***N*-isobutyl-3-*exo*-(4-fluorophenyl)tricyclo[3.2.1.0<sup>2,4</sup>]octane-6,7-*endo*-dicarboximide (3eb)**

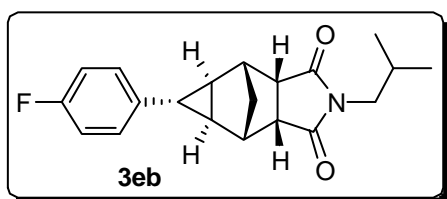

**e (3eb)**: The title compound was prepared according to the general procedure and purified by flash column chromatography on silica gel with a gradient eluent of petroleum ether/EtOAc

(10/1→3/1) to give light yellow sticky oil, 134.1 mg, 82 % yield. **Mp**: 124-127 °C; **<sup>1</sup>H NMR** (400 MHz, CDCl<sub>3</sub>) δ 6.87-6.95 (m, 4H), 3.33 (d, *J* = 7.2 Hz, 2H), 3.12 (s, 2H), 3.01 (s, 2H), 2.98-2.08 (m, 2H), 1.53 (d, *J* = 11.2 Hz, 1H), 1.16 (s, 1H), 1.13 (d, *J* = 2.0 Hz, 2H), 0.91 (d, *J* = 6.8 Hz, 6H); **<sup>13</sup>C NMR** (100 MHz, CDCl<sub>3</sub>) δ 177.9, 161.3 (d, *J*<sub>C-F</sub> = 242.8 Hz), 136.0 (d, *J*<sub>C-F</sub> = 2.7 Hz), 127.9 (d, *J*<sub>C-F</sub> = 8.4 Hz), 115.1 (d, *J*<sub>C-F</sub> = 21.1 Hz), 49.2, 46.2, 38.8, 31.9, 27.4, 21.8, 20.4, 16.8; **HRMS (EI)** calcd. for

$C_{20}H_{22}FNO_2$  [ $M^+$ ]: 327.1635, found: 327.1638.

***N*-isobutyl-3-*exo*-(4-chlorophenyl)tricyclo[3.2.1.0<sup>2,4</sup>]octane-6,7-*endo*-dicarboximide**

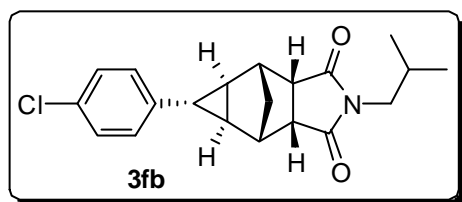

**de (3fb):** The title compound was prepared according to the general procedure and purified by flash column chromatography on silica gel with a gradient eluent of petroleum

ether/EtOAc (10/1→3/1) to give light yellow solid, 132.1 mg, 77 % yield. **Mp:** 155-158 °C; **<sup>1</sup>H NMR** (400 MHz, CDCl<sub>3</sub>) δ 7.17 (d, *J* = 8.0 Hz, 2H), 6.89 (d, *J* = 7.6 Hz, 2H), 3.33 (d, *J* = 7.2 Hz, 2H), 3.13 (s, 2H), 3.01 (s, 2H), 2.00-2.08 (m, 2H), 1.53 (d, *J* = 11.2 Hz, 1H), 1.16 (s, 1H), 1.13 (s, 2H), 0.91 (d, *J* = 6.8 Hz, 6H); **<sup>13</sup>C NMR** (100 MHz, CDCl<sub>3</sub>) δ 177.8, 139.0, 131.7, 128.4, 127.7, 49.2, 46.2, 38.8, 31.9, 27.4, 22.1, 20.4, 16.9; **HRMS (EI)** calcd. for C<sub>20</sub>H<sub>22</sub>ClNO<sub>2</sub> [ $M^+$ ]: 343.1339, found: 343.1337.

***N*-isobutyl-3-*exo*-(3-chlorophenyl)tricyclo[3.2.1.0<sup>2,4</sup>]octane-6,7-*endo*-dicarboximide**

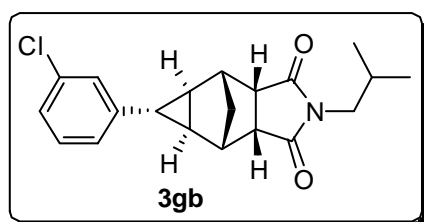

**de (3gb):** The title compound was prepared according to the general procedure and purified by flash column chromatography on silica gel with a gradient eluent of petroleum ether/EtOAc (10/1→

3/1) to give light yellow sticky oil, 127.0 mg, 74 % yield. **Mp:** 110-113 °C; **<sup>1</sup>H NMR** (400 MHz, CDCl<sub>3</sub>) δ 7.11-7.14 (m, 2H), 6.91 (s, 1H), 6.86 (d, *J* = 6.0 Hz, 1H), 3.34 (d, *J* = 7.2 Hz, 2H), 3.13 (s, 2H), 3.02 (s, 2H), 2.00-2.10 (m, 2H), 1.52 (d, *J* = 11.2 Hz, 1H), 1.16 (s, 2H), 1.13 (s, 1H), 0.94 (d, *J* = 6.8 Hz, 6H); **<sup>13</sup>C NMR** (100 MHz, CDCl<sub>3</sub>) δ 177.8, 142.7, 134.2, 129.5, 126.3, 126.1, 124.7, 49.2, 46.3, 38.8, 31.9, 27.5, 22.4, 20.5, 17.2; **HRMS (EI)** calcd. for C<sub>20</sub>H<sub>22</sub>ClNO<sub>2</sub> [ $M^+$ ]: 343.1339, found: 343.1337.

**3-*exo*-phenyltricyclo[3.2.1.0<sup>2,4</sup>]octane (3ac):** The title compound was prepared

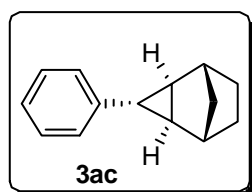

according to the general procedure and purified by flash column chromatography on silica gel with a eluent of petroleum ether/EtOAc (100/1) to give light yellow sticky oil, 81.9 mg, 89 % yield. **<sup>1</sup>H NMR** (400 MHz, CDCl<sub>3</sub>) δ 7.19 (t, *J* = 8.0 Hz,

2H), 7.09-7.12 (m, 1H), 7.01 (d, *J* = 6.8 Hz, 2H), 2.41 (s, 2H), 1.81 (t, *J* = 2.8 Hz, 1H),

1.46-1.51 (m, 2H), 1.30-1.35 (m, 2H), 1.16-1.20 (m, 1H), 1.02 (d,  $J = 2.4$  Hz, 2H), 0.74 (d,  $J = 10.4$  Hz, 1H);  $^{13}\text{C}$  NMR (100 MHz,  $\text{CDCl}_3$ )  $\delta$  143.2, 128.2, 125.9, 125.1, 36.5, 29.5, 28.8, 27.8, 18.4; HRMS (EI) calcd. for  $\text{C}_{14}\text{H}_{16}$  [ $\text{M}^+$ ]: 184.1252, found: 184.1250.

**3-*exo*-(4-methylphenyl)tricyclo[3.2.1.0<sup>2,4</sup>]octane (3bc):** The title compound was

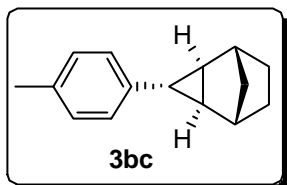

prepared according to the general procedure and purified by flash column chromatography on silica gel with a eluent of petroleum ether to give light yellow sticky oil, 91.1 mg, 92 % yield.  $^1\text{H}$  NMR (400 MHz,  $\text{CDCl}_3$ )  $\delta$  7.01 (d,  $J = 8.4$  Hz,

2H), 6.91 (dd,  $J = 2.0$  Hz,  $J = 8.4$  Hz, 2H), 2.39 (s, 2H), 2.27 (s, 3H), 1.78 (t,  $J = 2.4$  Hz, 1H), 1.47-1.50 (m, 2H), 1.30-1.34 (m, 2H), 1.16 (dd,  $J = 2.0$  Hz,  $J = 10.4$  Hz, 1H), 0.98 (s, 2H) 0.72 (d,  $J = 10.4$  Hz, 1H);  $^{13}\text{C}$  NMR (100 MHz,  $\text{CDCl}_3$ )  $\delta$  140.1, 134.6, 128.9, 125.8, 36.4, 29.5, 28.8, 27.5, 21.0, 18.0; HRMS (EI) calcd. for  $\text{C}_{15}\text{H}_{18}$  [ $\text{M}^+$ ]: 198.1409, found: 198.1412.

**3-*exo*-(3-methylphenyl)tricyclo[3.2.1.0<sup>2,4</sup>]octane (3cc):** The title compound was

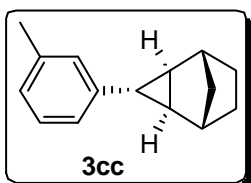

prepared according to the general procedure and purified by flash column chromatography on silica gel with a eluent of petroleum ether to give light yellow sticky oil, 89.2 mg, 90 % yield.  $^1\text{H}$  NMR (400 MHz,  $\text{CDCl}_3$ )  $\delta$  7.09 (t,  $J = 7.2$  Hz, 1H),

6.91 (d,  $J = 7.6$  Hz, 1H), 6.82 (d,  $J = 9.2$  Hz, 2H), 2.40 (s, 2H), 2.29 (s, 3H), 1.78 (t,  $J = 2.8$  Hz, 1H), 1.47-1.50 (m, 2H), 1.31-1.34 (m, 2H), 1.15-1.19 (m, 1H), 1.01 (d,  $J = 2.8$  Hz, 2H), 0.73 (d,  $J = 10.8$  Hz, 1H);  $^{13}\text{C}$  NMR (100 MHz,  $\text{CDCl}_3$ )  $\delta$  143.2, 137.7, 128.1, 126.7, 125.9, 122.9, 36.4, 29.5, 28.8, 27.7, 21.5, 18.3; HRMS (EI) calcd. for  $\text{C}_{15}\text{H}_{18}$  [ $\text{M}^+$ ]: 198.1409, found: 198.1411.

**3-*exo*-(3-chlorophenyl)tricyclo[3.2.1.0<sup>2,4</sup>]octane (3gc):** The title compound was

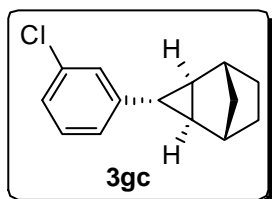

prepared according to the general procedure and purified by flash column chromatography on silica gel with a eluent of petroleum ether to give light yellow sticky oil, 93.8 mg, 86 % yield.  $^1\text{H}$  NMR (400 MHz,  $\text{CDCl}_3$ )  $\delta$  7.05-7.13 (m, 2H), 6.97

(t,  $J = 2.0$  Hz, 1H), 6.88-6.91 (m, 1H), 2.41 (s, 2H), 1.78 (t,  $J = 2.8$  Hz, 1H), 1.47-1.51

(m, 2H), 1.29-1.34 (m, 2H), 1.12-1.16 (m, 1H), 1.01 (d,  $J = 2.4$  Hz, 2H), 0.74 (d,  $J = 10.8$  Hz, 1H);  $^{13}\text{C NMR}$  (100 MHz,  $\text{CDCl}_3$ )  $\delta$  145.5, 134.0, 129.3, 125.9, 125.2, 124.3, 36.4, 29.3, 28.7, 28.0, 18.2; **HRMS (EI)** calcd. for  $\text{C}_{14}\text{H}_{15}\text{Cl}$  [ $\text{M}^+$ ]: 218.0862, found: 218.0859.

**3-*exo*-(4-methoxyphenyl)tricyclo[3.2.1.0<sup>2,4</sup>]octane (3ic):** The title compound was

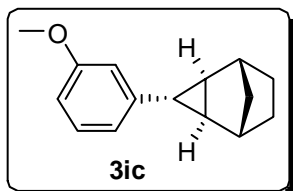

prepared according to the general procedure and purified by flash column chromatography on silica gel with a eluent of petroleum ether to give light yellow sticky oil, 99.6 mg, 93 % yield.  $^1\text{H NMR}$  (400 MHz,  $\text{CDCl}_3$ )  $\delta$  7.12 (t,  $J = 8.0$  Hz, 1H),

6.61-6.67 (m, 2H), 6.56 (d,  $J = 2.0$  Hz, 1H), 3.76 (s, 3H), 2.40 (s, 2H), 1.79 (t,  $J = 2.8$  Hz, 1H), 1.47-1.50 (m, 2H), 1.30-1.34 (m, 2H), 1.14-1.18 (m, 1H), 1.01 (d,  $J = 2.8$  Hz, 2H), 0.73 (d,  $J = 10.8$  Hz, 1H);  $^{13}\text{C NMR}$  (100 MHz,  $\text{CDCl}_3$ )  $\delta$  159.5, 145.0, 129.0, 118.4, 111.7, 110.5, 55.1, 36.4, 29.4, 28.7, 27.7, 18.4; **HRMS (EI)** calcd. for  $\text{C}_{15}\text{H}_{18}\text{O}$  [ $\text{M}^+$ ]: 214.1358, found: 214.1360.

**(1<sup>a</sup>*R*,2*R*,2<sup>a</sup>*R*,5<sup>a</sup>*R*,6*S*,6<sup>a</sup>*S*)-1-phenyl-1,1<sup>a</sup>,2,2<sup>a</sup>,3,5<sup>a</sup>,6,6<sup>a</sup>-octahydro-2,6-methanocyclo-**

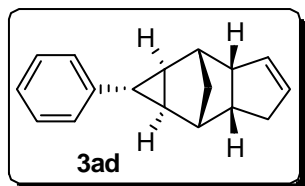

**ropa[f]indene (3ad):** The title compound was prepared according to the general procedure and purified by flash column chromatography on silica gel with a eluent of petroleum ether to give light yellow solid, 99.9 mg, 90 %

yield. **Mp:** 94-99 °C;  $^1\text{H NMR}$  (400 MHz,  $\text{CDCl}_3$ )  $\delta$  7.18 (t,  $J = 7.6$  Hz, 2H), 7.00 (t,  $J = 7.6$  Hz, 1H), 6.99 (d,  $J = 7.2$  Hz, 2H), 5.76 (dd,  $J = 2.0$  Hz,  $J = 5.6$  Hz, 1H), 5.58 (dd,  $J = 2.4$  Hz,  $J = 5.6$  Hz, 1H), 3.10-3.14 (m, 1H), 2.54-2.60 (m, 1H), 2.49-2.50 (m, 1H), 2.34-2.42 (m, 2H), 2.20-2.28 (m, 1H), 1.91 (t,  $J = 2.8$  Hz, 1H), 1.30 (d,  $J = 10.8$  Hz, 1H), 1.12-1.13 (m, 1H), 0.96 (d,  $J = 10.4$  Hz, 1H), 0.86-0.89 (m, 1H);  $^{13}\text{C NMR}$  (100 MHz,  $\text{CDCl}_3$ )  $\delta$  143.6, 132.3, 131.0, 128.2, 126.0, 125.2, 54.8, 43.2, 40.1, 38.7, 31.8, 31.6, 25.4, 22.5, 17.6; **HRMS (EI)** calcd. for  $\text{C}_{17}\text{H}_{18}$  [ $\text{M}^+$ ]: 222.1409, found: 222.1411.

**(1<sup>a</sup>R,2R,2<sup>a</sup>R,5<sup>a</sup>R,6S,6<sup>a</sup>S)-1-(4-methylphenyl)-1,1<sup>a</sup>,2,2<sup>a</sup>,3,5<sup>a</sup>,6,6<sup>a</sup>-octahydro-2,6-met**

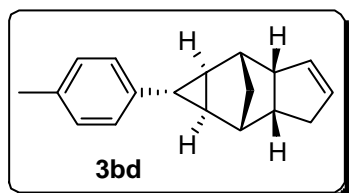

**hanocyclopropa[f]indene (3bd):** The title compound was prepared according to the general procedure and purified by flash column chromatography on silica gel with a eluent of petroleum ether to give light yellow

solid, 109.8 mg, 93 % yield. **Mp:** 84-87 °C; <sup>1</sup>H NMR (400 MHz, CDCl<sub>3</sub>) δ 7.01 (d, *J* = 7.6 Hz, 2H), 6.90 (d, *J* = 7.6 Hz, 2H), 5.76 (d, *J* = 4.8 Hz, 1H), 5.59 (d, *J* = 1.2 Hz, 1H), 3.11-3.13 (m, 1H), 2.55-2.60 (m, 1H), 2.50 (s, 1H), 2.37 (s, 2H), 2.27 (s, 3H), 2.20-2.31 (m, 1H), 1.89 (s, 1H), 1.30 (d, *J* = 10.8 Hz, 1H), 1.09 (d, *J* = 6.8 Hz, 1H), 0.96 (d, *J* = 10.8 Hz, 1H), 0.84 (d, *J* = 6.8 Hz, 1H); <sup>13</sup>C NMR (100 MHz, CDCl<sub>3</sub>) δ 140.4, 134.6, 132.3, 130.9, 128.8, 126.0, 54.8, 43.2, 40.1, 38.7, 31.7, 31.6, 24.9, 22.1, 21.0, 17.2; **HRMS (EI)** calcd. for C<sub>18</sub>H<sub>20</sub> [M<sup>+</sup>]: 236.1565, found: 236.1567.

**(1<sup>a</sup>R,2R,2<sup>a</sup>R,5<sup>a</sup>R,6S,6<sup>a</sup>S)-1-(3-methylphenyl)-1,1<sup>a</sup>,2,2<sup>a</sup>,3,5<sup>a</sup>,6,6<sup>a</sup>-octahydro-2,6-met**

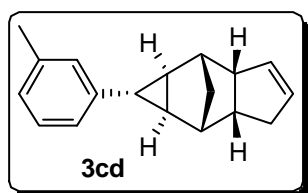

**hanocyclopropa[f]indene (3cd):** The title compound was prepared according to the general procedure and purified by flash column chromatography on silica gel with a eluent of petroleum ether to give light yellow solid, 107.4 mg, 91 %

yield. **Mp:** 70-73 °C; <sup>1</sup>H NMR (400 MHz, CDCl<sub>3</sub>) δ 7.08 (t, *J* = 7.6 Hz, 1H), 6.90 (t, *J* = 7.6 Hz, 1H), 6.80 (d, *J* = 8.0 Hz, 2H), 5.76 (dd, *J* = 2.0 Hz, *J* = 6.0 Hz, 1H), 5.58 (dd, *J* = 2.4 Hz, *J* = 5.2 Hz, 1H), 3.10-3.13 (m, 1H), 2.53-2.60 (m, 1H), 2.48-2.49 (m, 1H), 2.37-2.39 (m, 2H), 2.32-2.34 (m, 1H), 2.28 (s, 3H), 1.88 (t, *J* = 2.4 Hz, 1H), 1.29 (d, *J* = 10.4 Hz, 1H), 1.10-1.12 (m, 1H), 0.95 (d, *J* = 10.8 Hz, 1H), 0.85-0.88 (m, 1H); <sup>13</sup>C NMR (100 MHz, CDCl<sub>3</sub>) δ 143.5, 137.6, 132.4, 131.0, 128.1, 127.0, 126.0, 123.0, 54.8, 43.2, 40.1, 38.7, 31.8, 31.6, 25.1, 22.3, 21.5, 17.5; **HRMS (EI)** calcd. for C<sub>18</sub>H<sub>20</sub> [M<sup>+</sup>]: 236.1565, found: 236.1568.

**(1<sup>a</sup>R,2R,2<sup>a</sup>R,5<sup>a</sup>R,6S,6<sup>a</sup>S)-1-(4-fluorophenyl)-1,1<sup>a</sup>,2,2<sup>a</sup>,3,5<sup>a</sup>,6,6<sup>a</sup>-octahydro-2,6-meth**

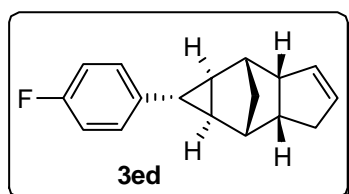

**anocyclopropa[f]indene (3ed):** The title compound was prepared according to the general procedure and purified by flash column chromatography on silica gel

with a eluent of petroleum ether to give light yellow solid, 103.3 mg, 86 % yield. **Mp:** 77-81 °C; **<sup>1</sup>H NMR** (400 MHz, CDCl<sub>3</sub>) δ 6.92-6.96 (m, 2H), 6.86-6.91 (m, 2H), 5.75 (dd, *J* = 2.0 Hz, *J* = 5.6 Hz, 1H), 5.58 (dd, *J* = 2.4 Hz, *J* = 5.6 Hz, 1H), 3.10-3.14 (m, 1H), 2.54-2.60 (m, 1H), 2.49-2.50 (m, 1H), 2.35-2.41 (m, 2H), 2.20-2.28 (m, 1H), 1.90 (t, *J* = 2.8 Hz, 1H), 1.28 (d, *J* = 10.4 Hz, 1H), 1.05-1.07 (m, 1H), 0.98 (d, *J* = 10.8 Hz, 1H), 0.80-0.83 (m, 1H); **<sup>13</sup>C NMR** (100 MHz, CDCl<sub>3</sub>) δ 161.0 (d, *J*<sub>C-F</sub> = 240.9 Hz), 139.0 (d, *J*<sub>C-F</sub> = 3.1 Hz), 132.3, 130.9, 127.3 (d, *J*<sub>C-F</sub> = 7.0 Hz), 114.8 (d, *J*<sub>C-F</sub> = 20.5 Hz), 54.7, 43.1, 40.0, 38.6, 31.7, 31.6, 25.2, 22.3, 16.9; **HRMS (EI)** calcd. for C<sub>17</sub>H<sub>17</sub>F [M<sup>+</sup>]: 240.1314, found: 240.1311.

**(1<sup>a</sup>R,2R,2<sup>a</sup>R,5<sup>a</sup>R,6S,6<sup>a</sup>S)-1-(4-chlorophenyl)-1,1<sup>a</sup>,2,2<sup>a</sup>,3,5<sup>a</sup>,6,6<sup>a</sup>-octahydro-2,6-meth**

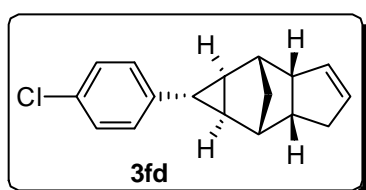

**anocyclopropa[f]indene (3fd):** The title compound was prepared according to the general procedure and purified by flash column chromatography on silica gel with a eluent of petroleum ether to give light yellow

solid, 117.8 mg, 92 % yield. **Mp:** 92-95 °C; **<sup>1</sup>H NMR** (400 MHz, CDCl<sub>3</sub>) δ 7.14 (d, *J* = 8.4 Hz, 2H), 6.91 (d, *J* = 8.4 Hz, 2H), 5.75 (dd, *J* = 2.0 Hz, *J* = 5.6 Hz, 1H), 5.58 (dd, *J* = 2.4 Hz, *J* = 5.6 Hz, 1H), 3.11-3.13 (m, 1H), 2.55-2.60 (m, 1H), 2.49 (d, *J* = 2.8 Hz, 1H), 2.34-2.39 (m, 2H), 2.25-2.28 (m, 1H), 1.87 (t, *J* = 2.4 Hz, 1H), 1.27 (d, *J* = 10.4 Hz, 1H), 1.05-1.07 (m, 1H), 0.97 (d, *J* = 10.4 Hz, 1H), 0.80-0.83 (m, 1H); **<sup>13</sup>C NMR** (100 MHz, CDCl<sub>3</sub>) δ 142.1, 132.4, 130.9, 129.1, 128.2, 127.3, 54.7, 43.1, 40.1, 38.7, 31.7, 31.6, 25.5, 22.7, 17.1; **HRMS (EI)** calcd. for C<sub>17</sub>H<sub>17</sub>Cl [M<sup>+</sup>]: 256.1019, found: 256.1017.

**(1<sup>a</sup>R,2R,2<sup>a</sup>R,5<sup>a</sup>R,6S,6<sup>a</sup>S)-1-(3-chlorophenyl)-1,1<sup>a</sup>,2,2<sup>a</sup>,3,5<sup>a</sup>,6,6<sup>a</sup>-octahydro-2,6-meth**

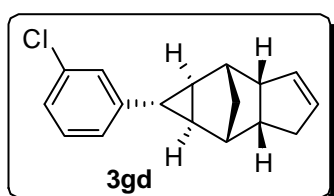

**anocyclopropa[f]indene (3gd):** The title compound was prepared according to the general procedure and purified by flash column chromatography on silica gel with a eluent of petroleum ether to give light yellow solid, 116.5

mg, 91 % yield. **Mp:** 101-103 °C; **<sup>1</sup>H NMR** (400 MHz, CDCl<sub>3</sub>) δ 7.04-7.12 (m, 2H), 7.04 (t, *J* = 1.6 Hz, 1H), 6.86-6.89 (m, 1H), 5.77 (dd, *J* = 2.0 Hz, *J* = 5.6 Hz, 1H), 5.58 (dd, *J* = 2.4 Hz, *J* = 5.6 Hz, 1H), 3.10-3.15 (m, 1H), 2.55-2.61 (m, 1H), 2.49-2.51 (m,

1H), 2.34-2.41 (m, 2H), 2.21-2.29 (m, 1H), 1.88 (t,  $J = 2.8$  Hz, 1H), 1.26 (d,  $J = 10.4$  Hz, 1H), 1.10-1.13 (m, 1H), 0.97 (d,  $J = 10.4$  Hz, 1H), 0.85-0.88 (m, 1H);  $^{13}\text{C}$  NMR (100 MHz,  $\text{CDCl}_3$ )  $\delta$  145.9, 134.0, 132.4, 130.8, 129.3, 126.0, 125.3, 124.4, 54.7, 43.1, 40.1, 38.7, 31.6, 31.6, 25.6, 22.7, 17.4; **HRMS (EI)** calcd. for  $\text{C}_{17}\text{H}_{17}\text{Cl}$  [ $\text{M}^+$ ]: 256.1019, found: 256.1016.

**(1<sup>a</sup>R,2R,2<sup>a</sup>R,5<sup>a</sup>R,6S,6<sup>a</sup>S)-1-(4-methoxyphenyl)-1,1<sup>a</sup>,2,2<sup>a</sup>,3,5<sup>a</sup>,6,6<sup>a</sup>-octahydro-2,6-me**

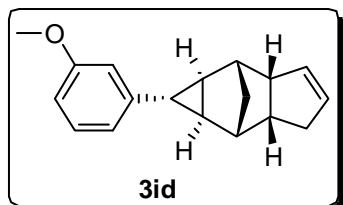

**thanocyclopropa[f]indene (3id):** The title compound was prepared according to the general procedure and purified by flash column chromatography on silica gel with a eluent of petroleum ether to give light yellow

solid, 118.5 mg, 94 % yield. **Mp:** 102-105 °C;  $^1\text{H}$  NMR (400 MHz,  $\text{CDCl}_3$ )  $\delta$  7.11 (t,  $J = 8.0$  Hz, 1H), 6.60-6.65 (m, 2H), 6.56 (d,  $J = 2.0$  Hz, 1H), 5.75 (dd,  $J = 2.0$  Hz,  $J = 5.6$  Hz, 1H), 5.58 (dd,  $J = 2.8$  Hz,  $J = 5.2$  Hz, 1H), 3.75 (s, 3H), 3.10-3.13 (m, 1H), 2.55-2.59 (m, 1H), 2.49-2.50 (m, 1H), 2.34-2.41 (m, 2H), 2.24-2.27 (m, 1H), 1.89 (t,  $J = 2.8$  Hz, 1H), 1.28 (d,  $J = 10.8$  Hz, 1H), 1.13 (d,  $J = 6.0$  Hz, 1H), 0.96 (d,  $J = 10.8$  Hz, 1H), 0.88 (d,  $J = 4.4$  Hz, 1H);  $^{13}\text{C}$  NMR (100 MHz,  $\text{CDCl}_3$ )  $\delta$  159.5, 145.4, 132.3, 130.9, 129.1, 118.6, 112.2, 110.1, 55.2, 54.8, 43.2, 40.1, 38.7, 31.7, 31.6, 25.4, 22.5, 17.7; **HRMS (EI)** calcd. for  $\text{C}_{18}\text{H}_{20}\text{O}$  [ $\text{M}^+$ ]: 252.1514, found: 252.1517.

**4 Copies for  $^1\text{H}$  NMR and  $^{13}\text{C}$  NMR**



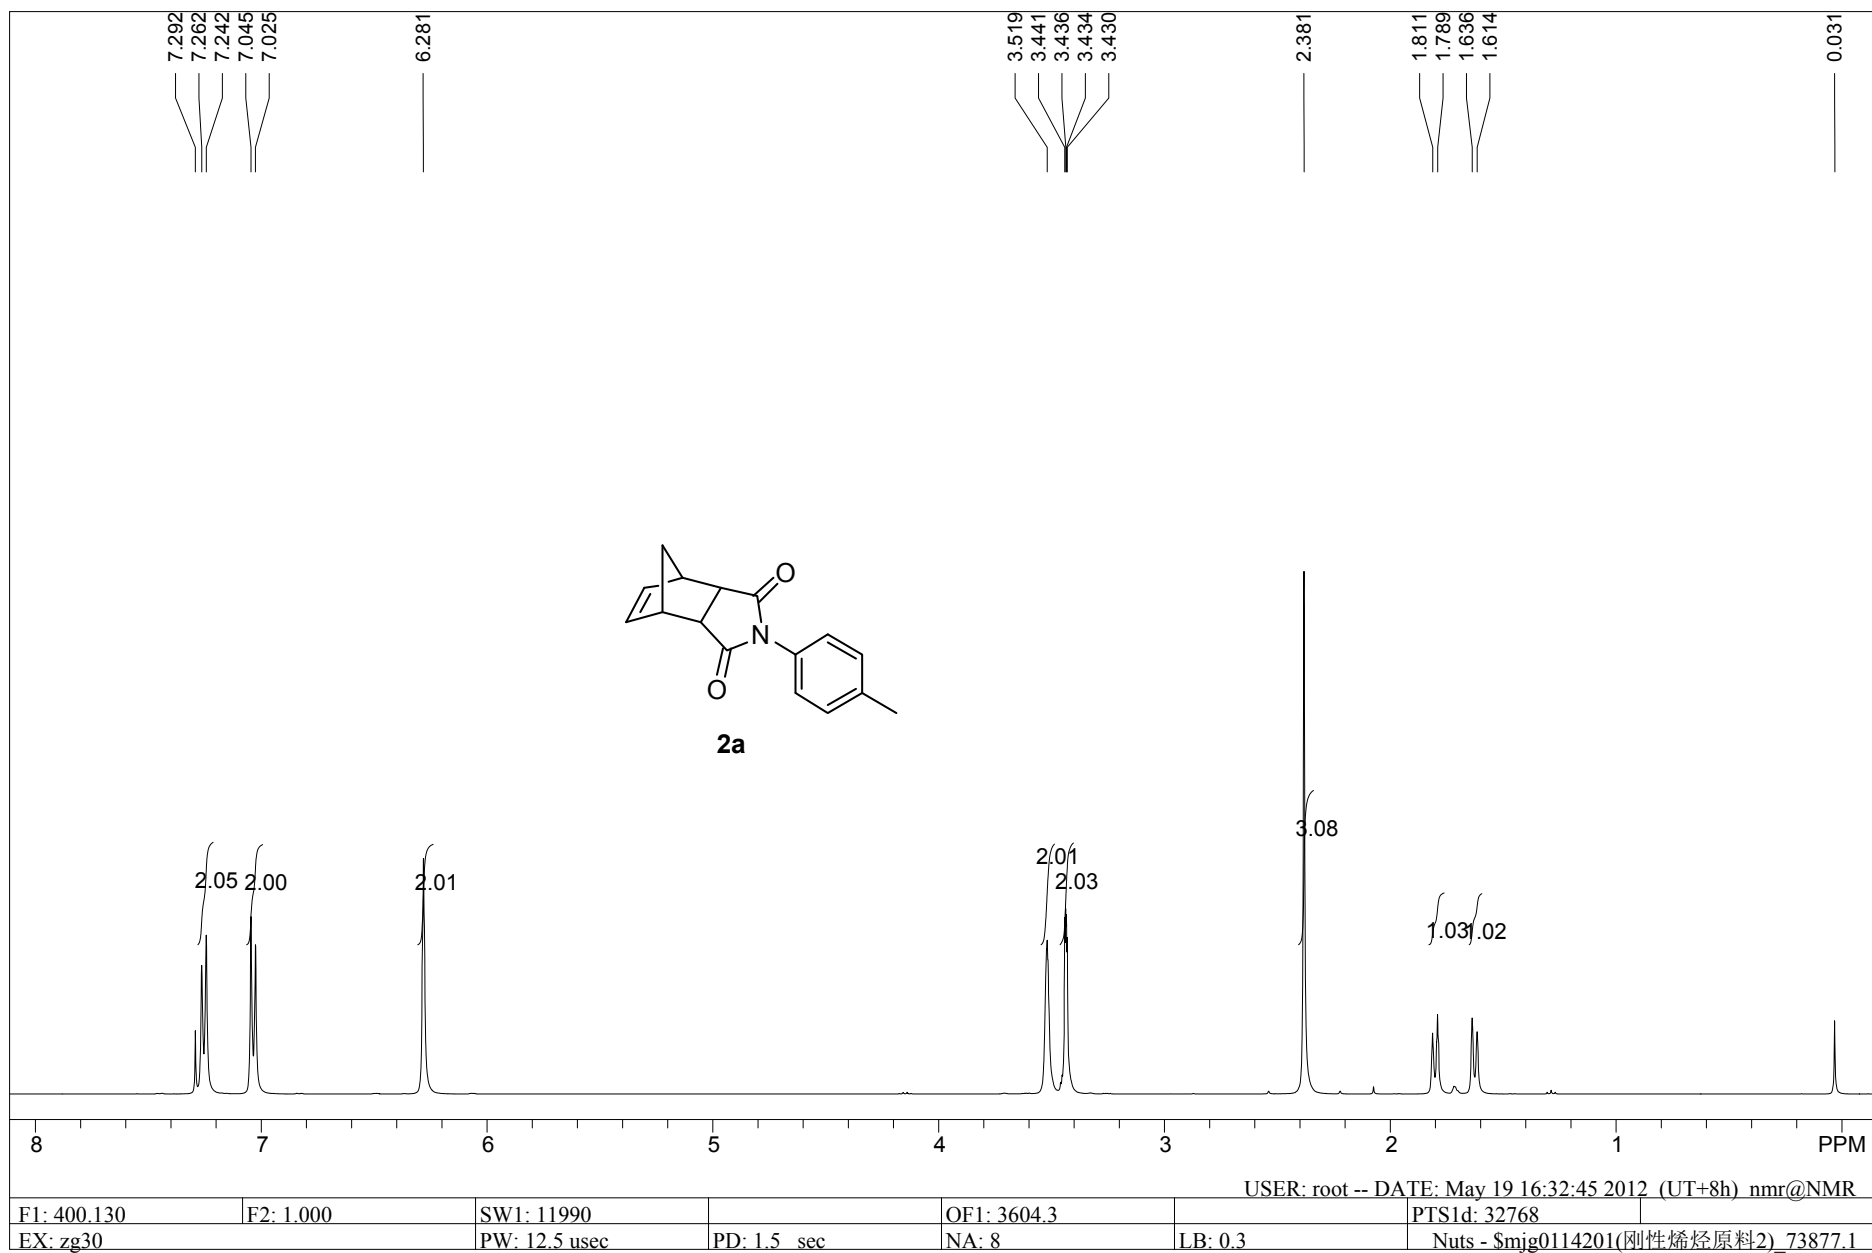

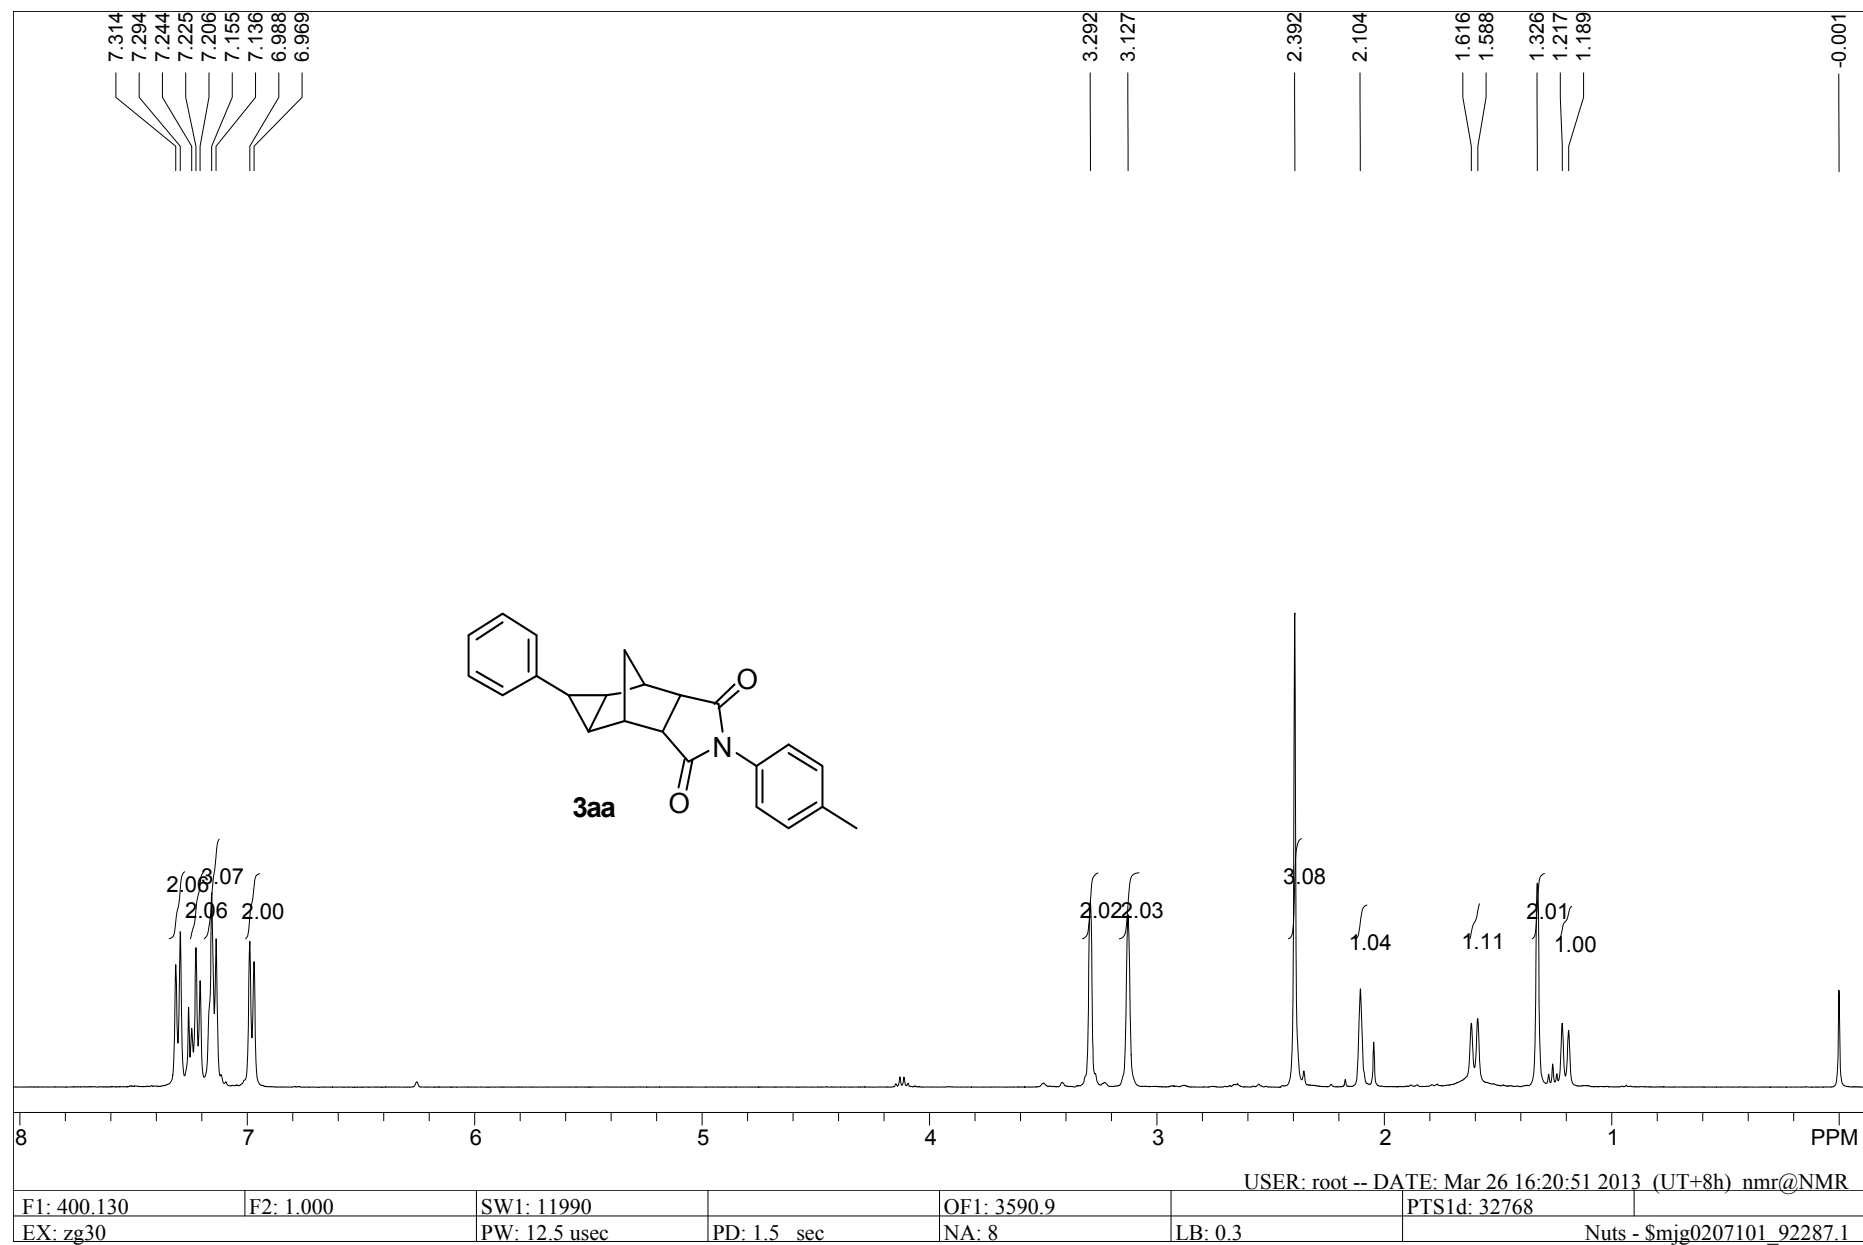

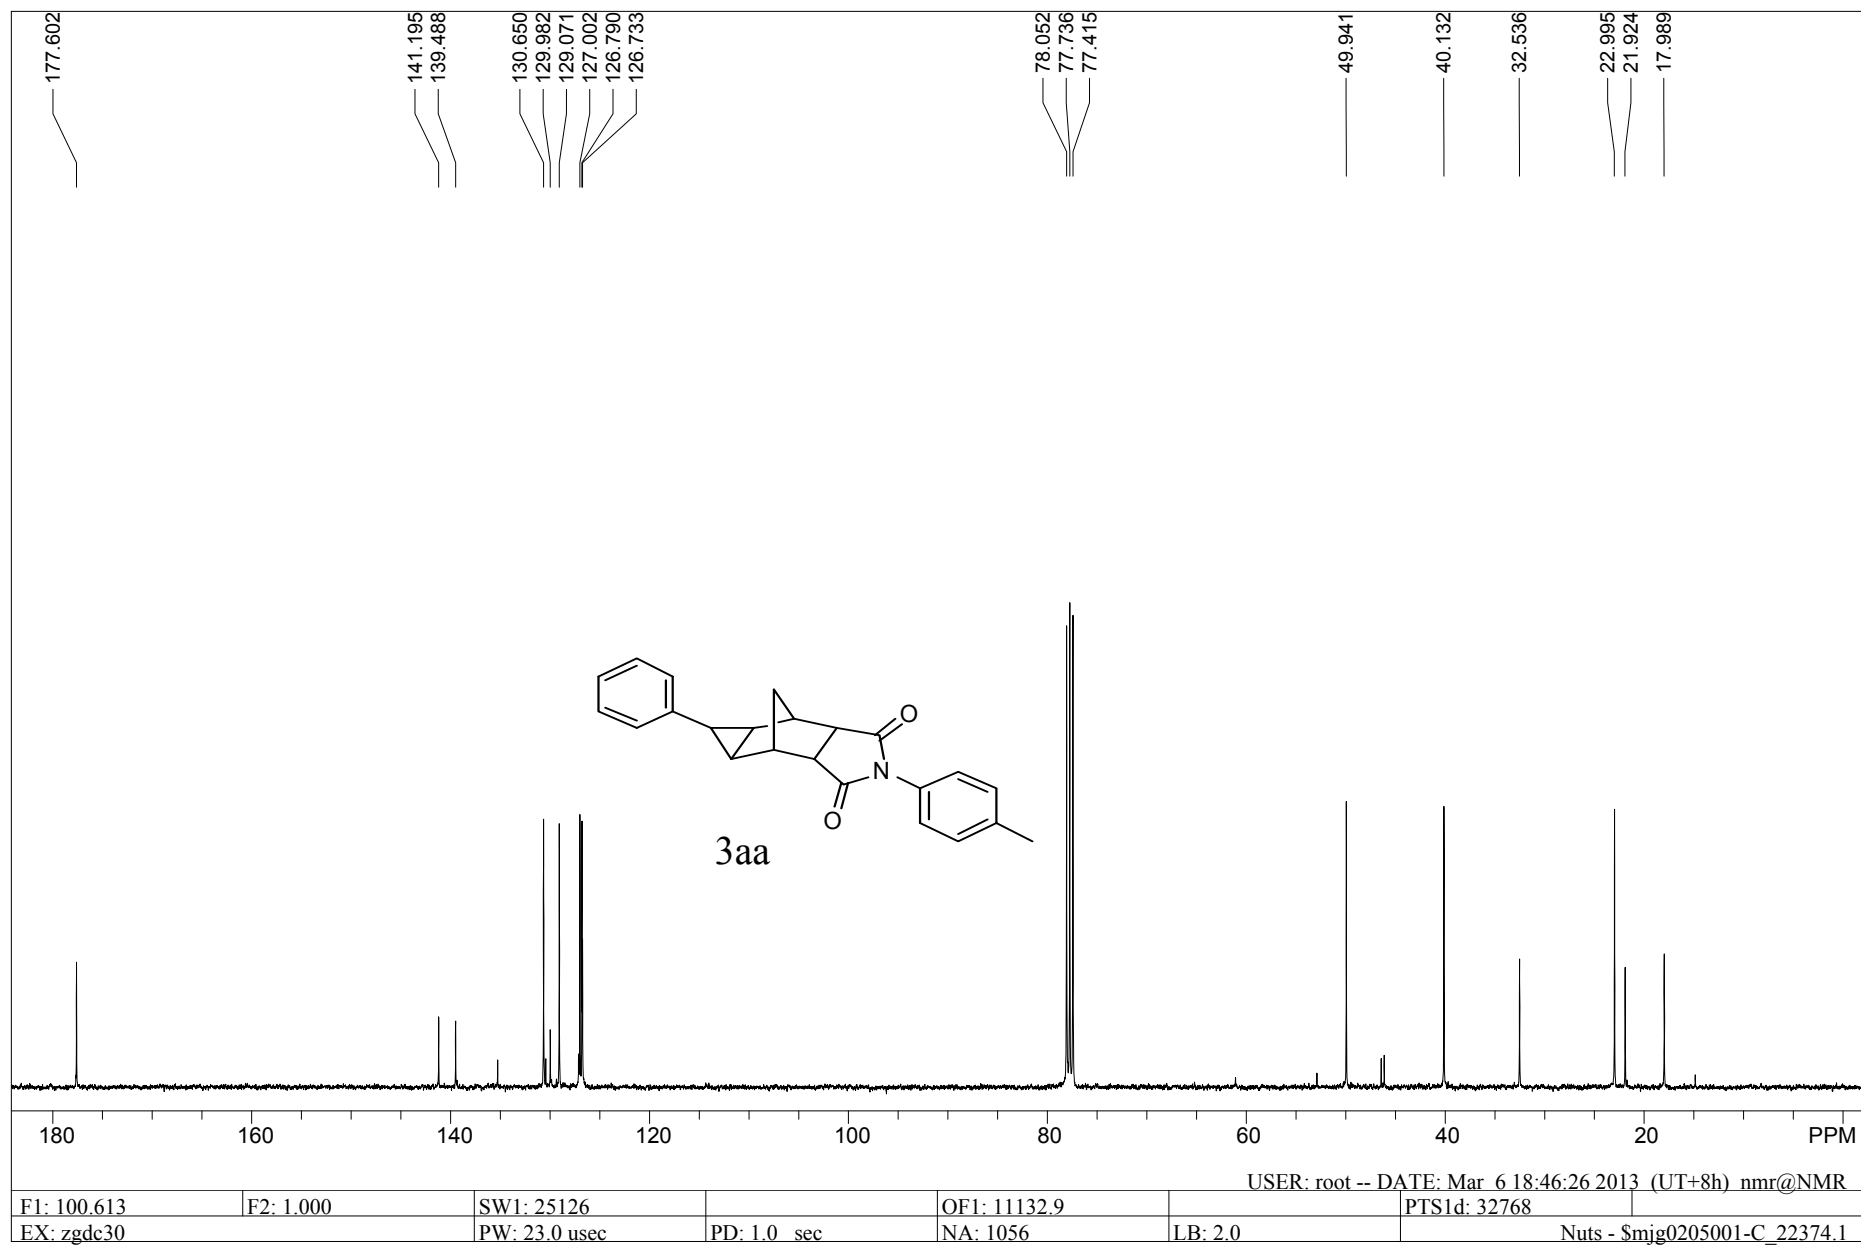

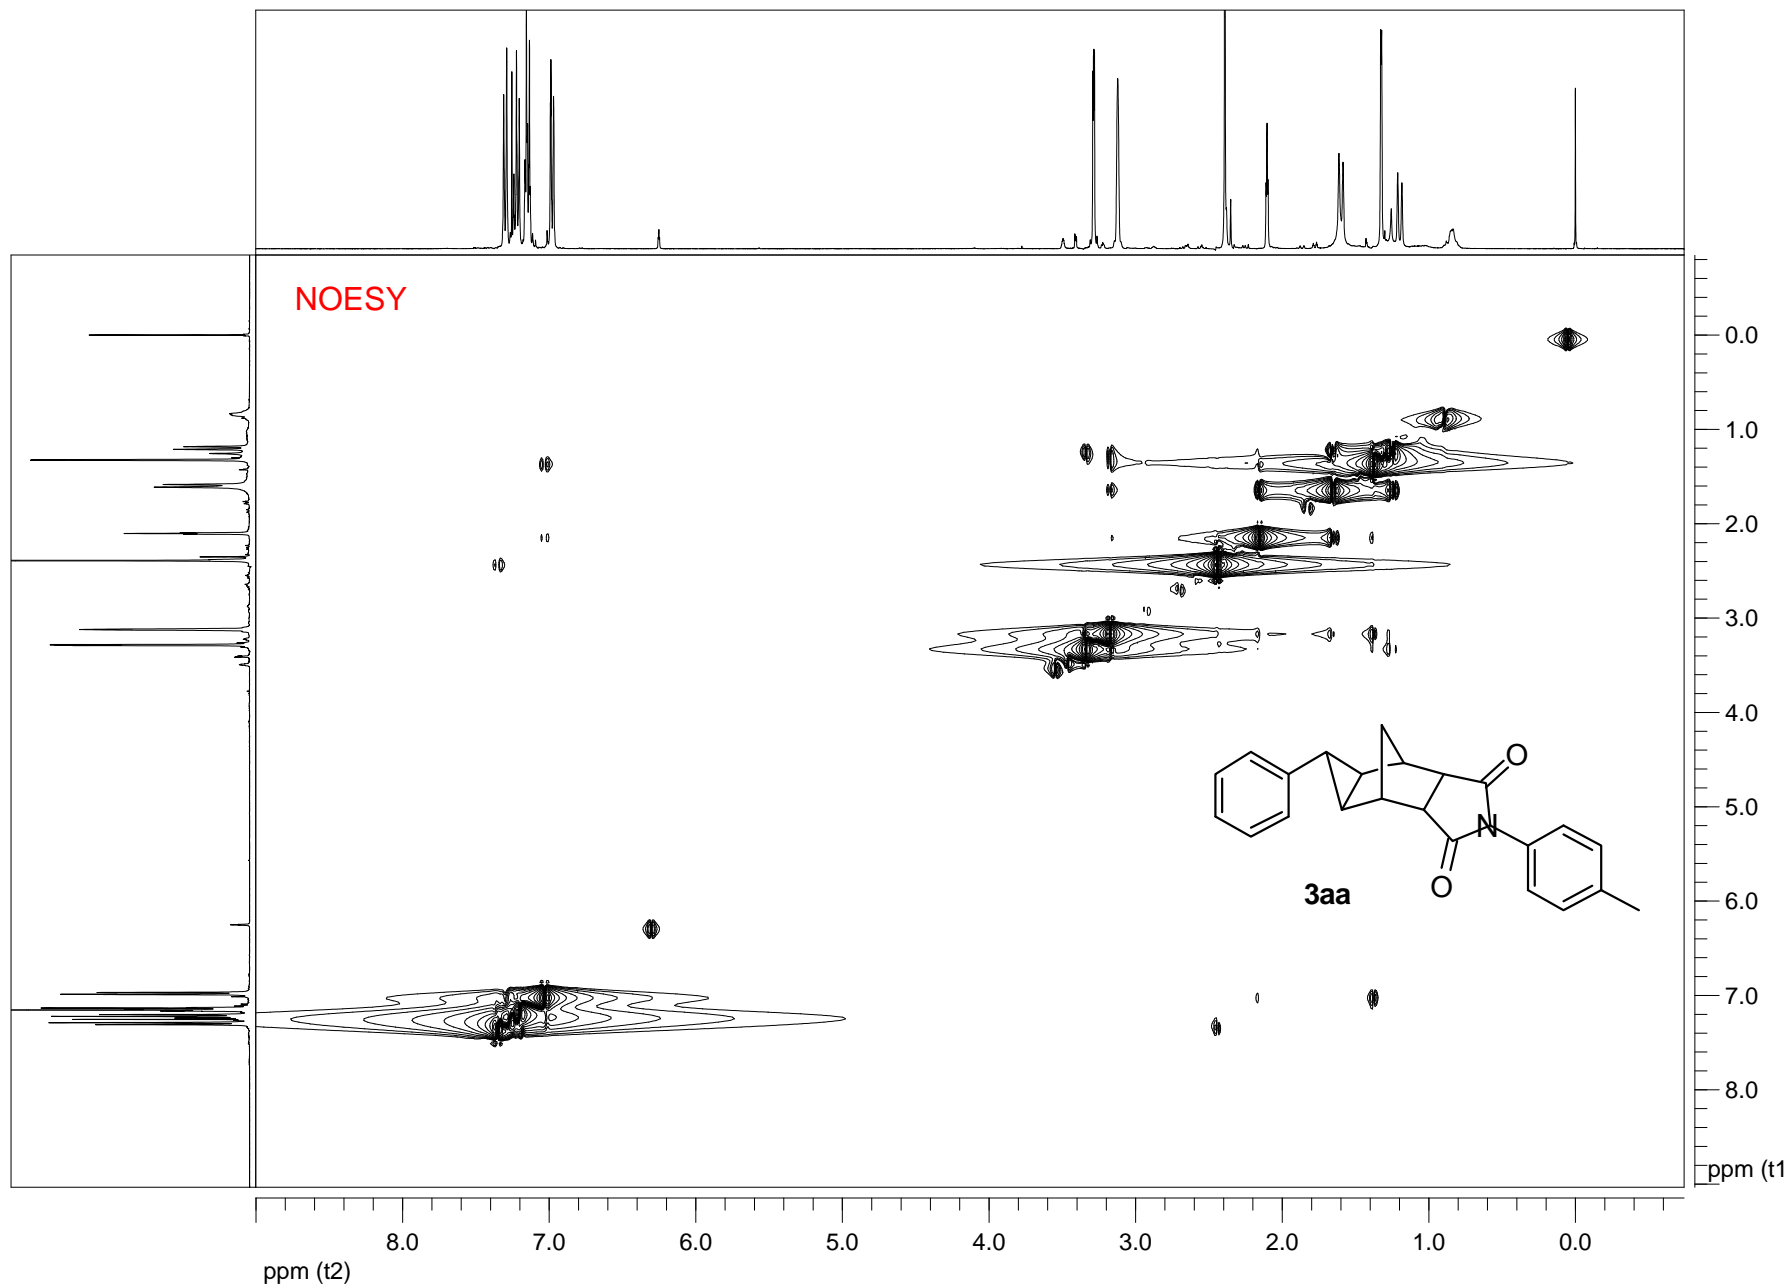

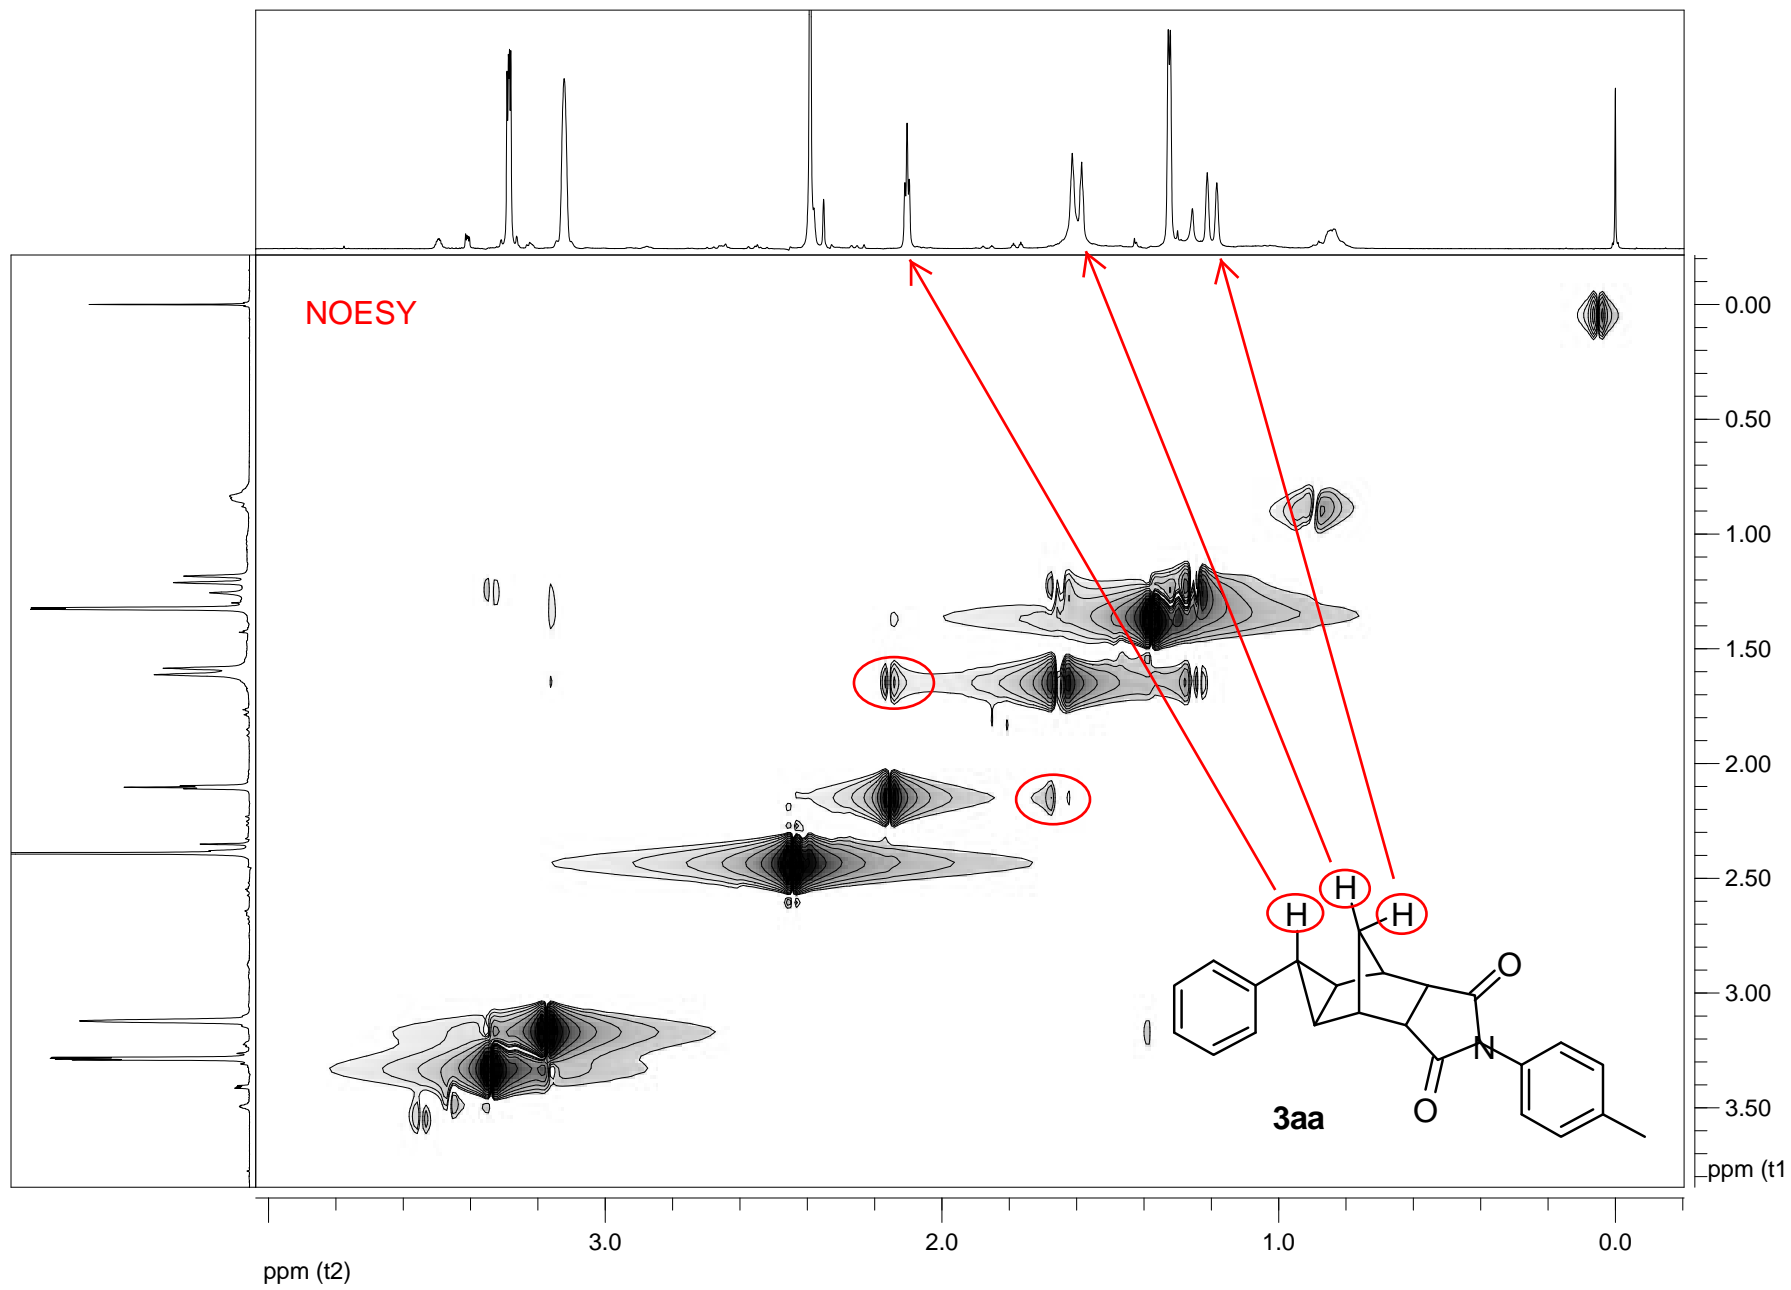

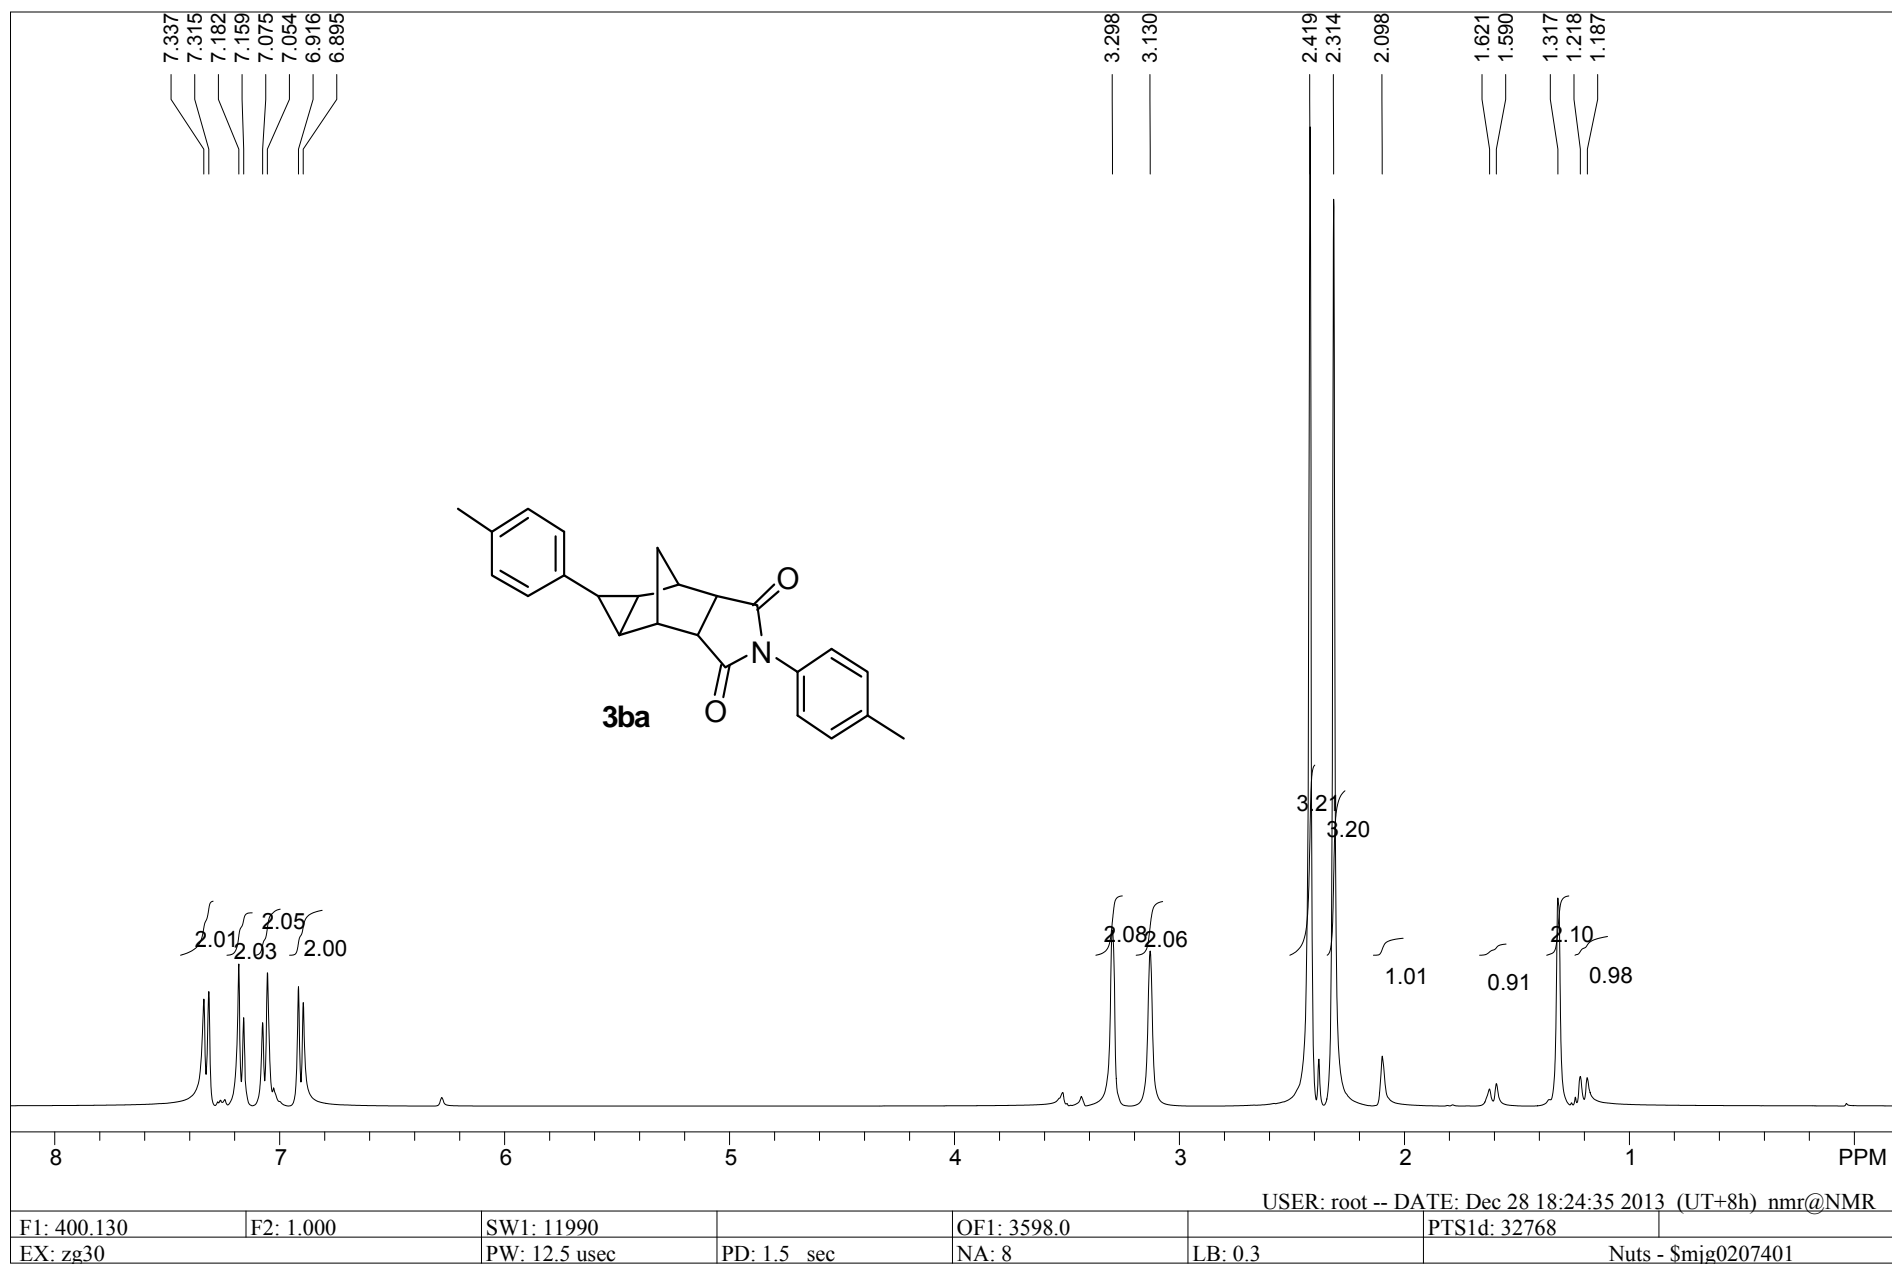

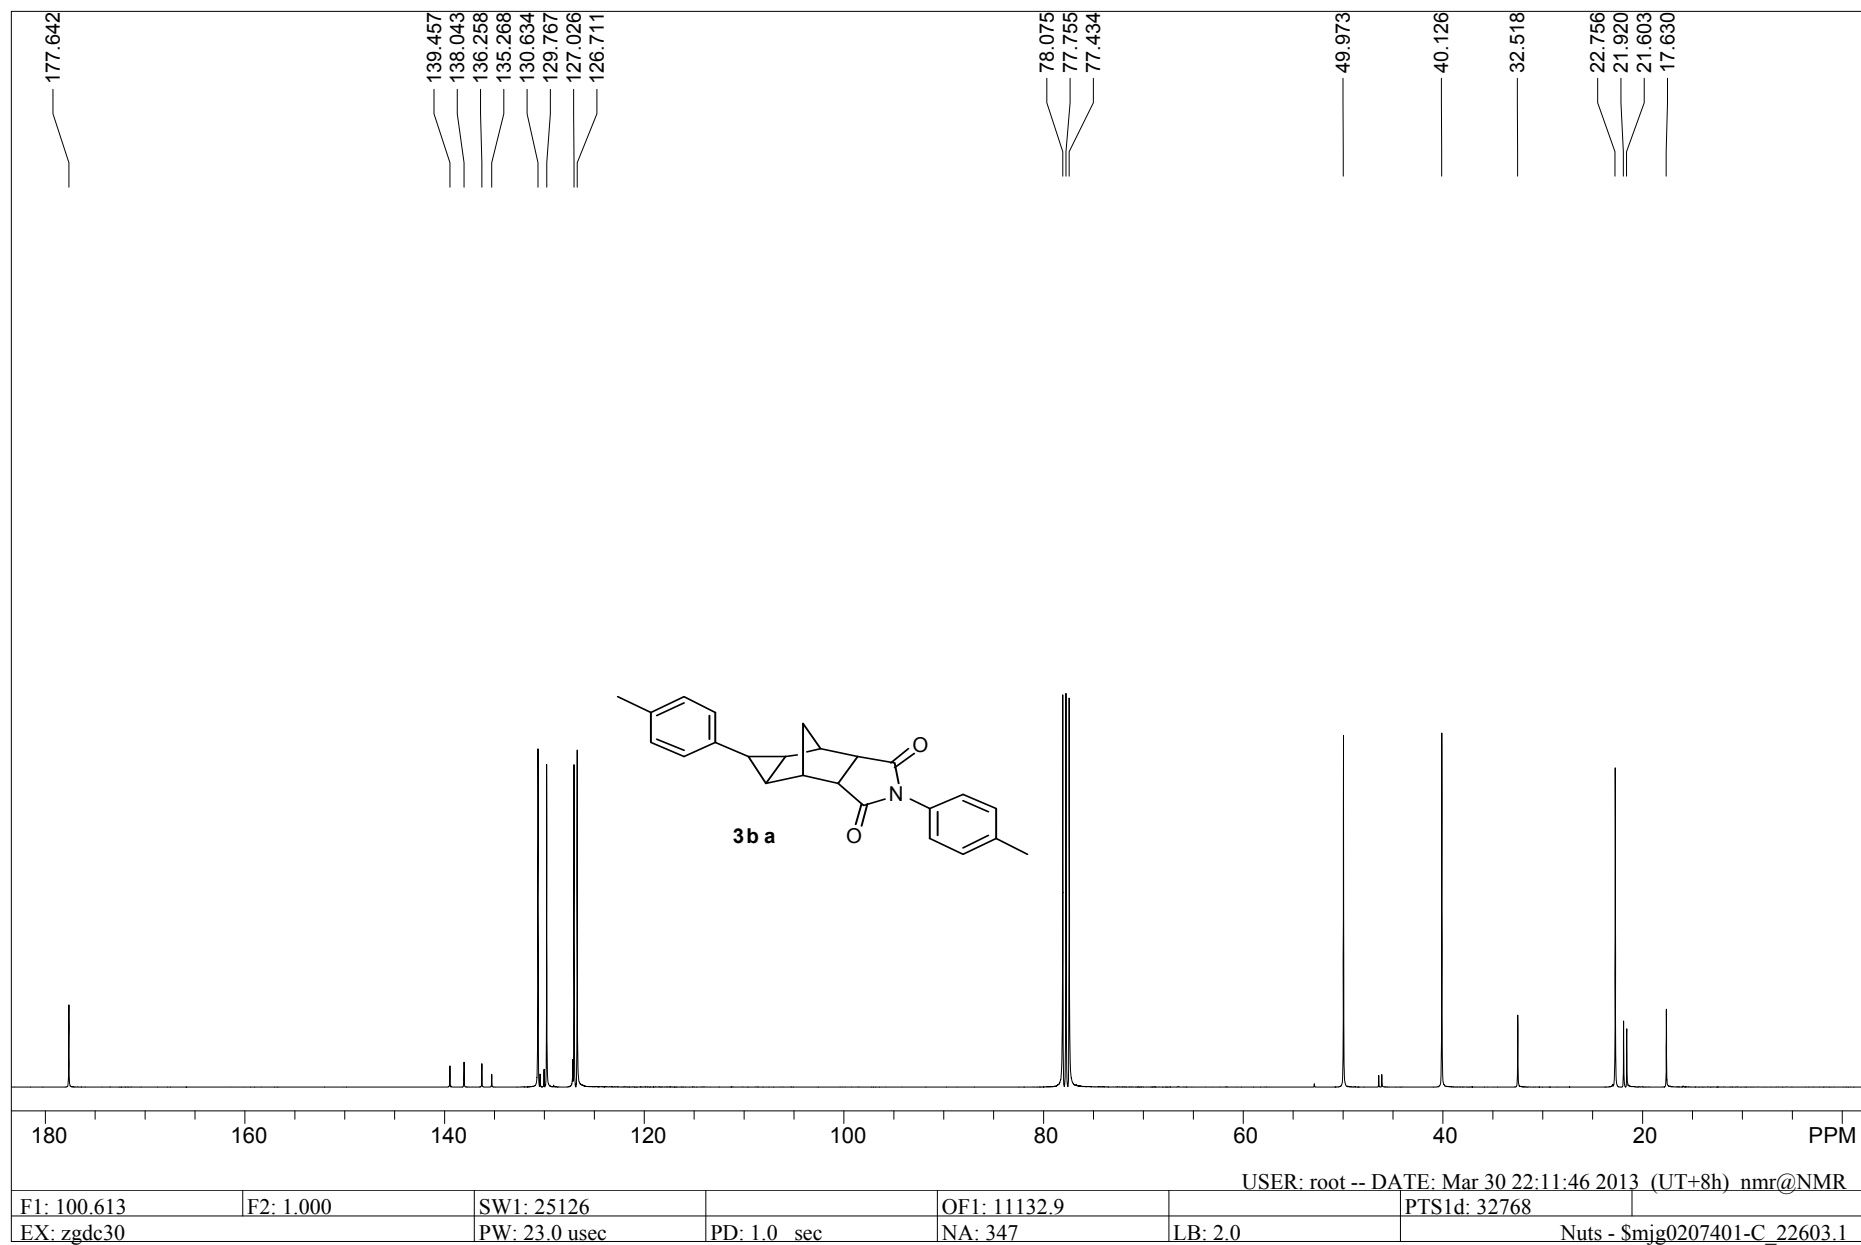

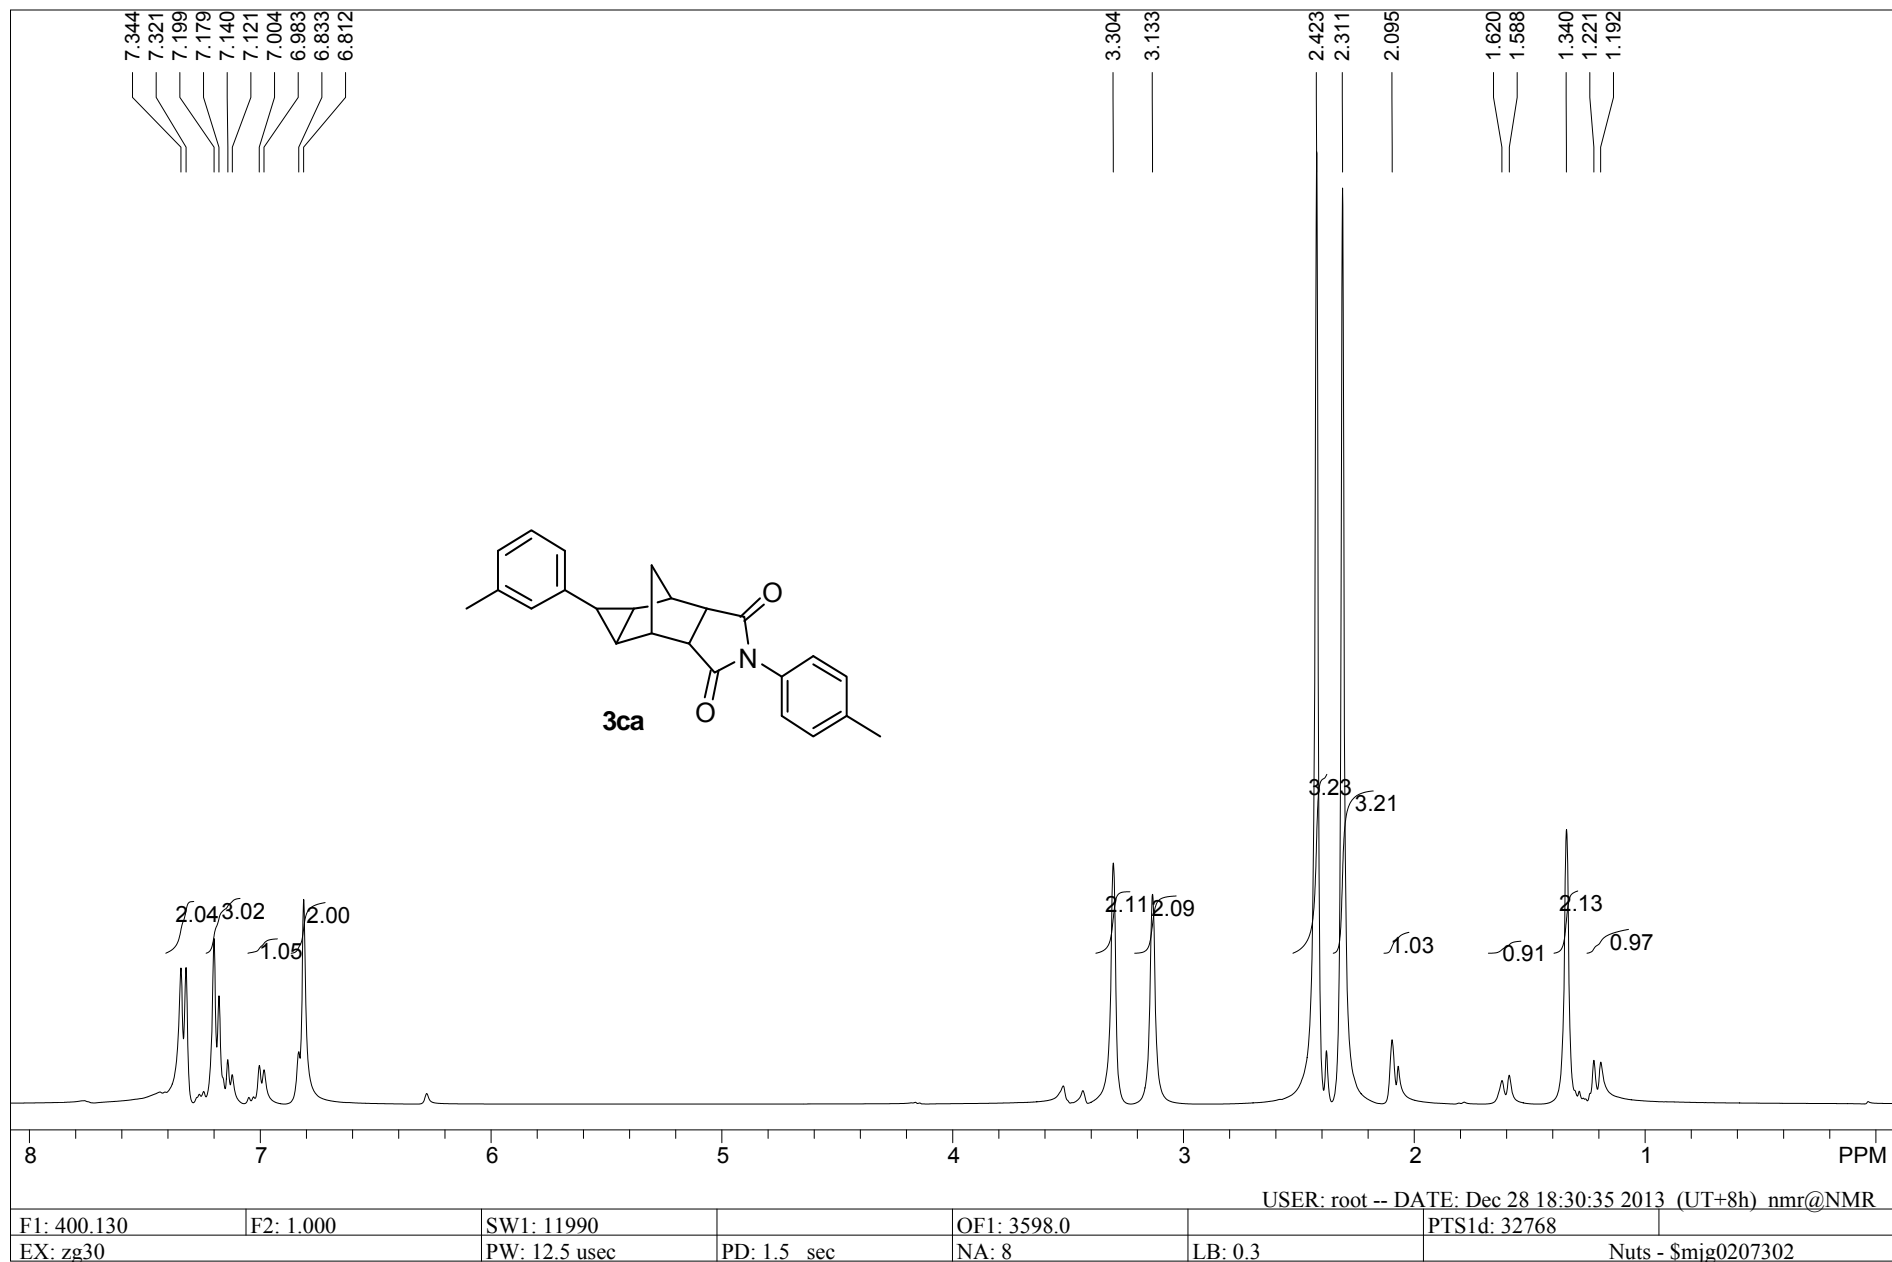



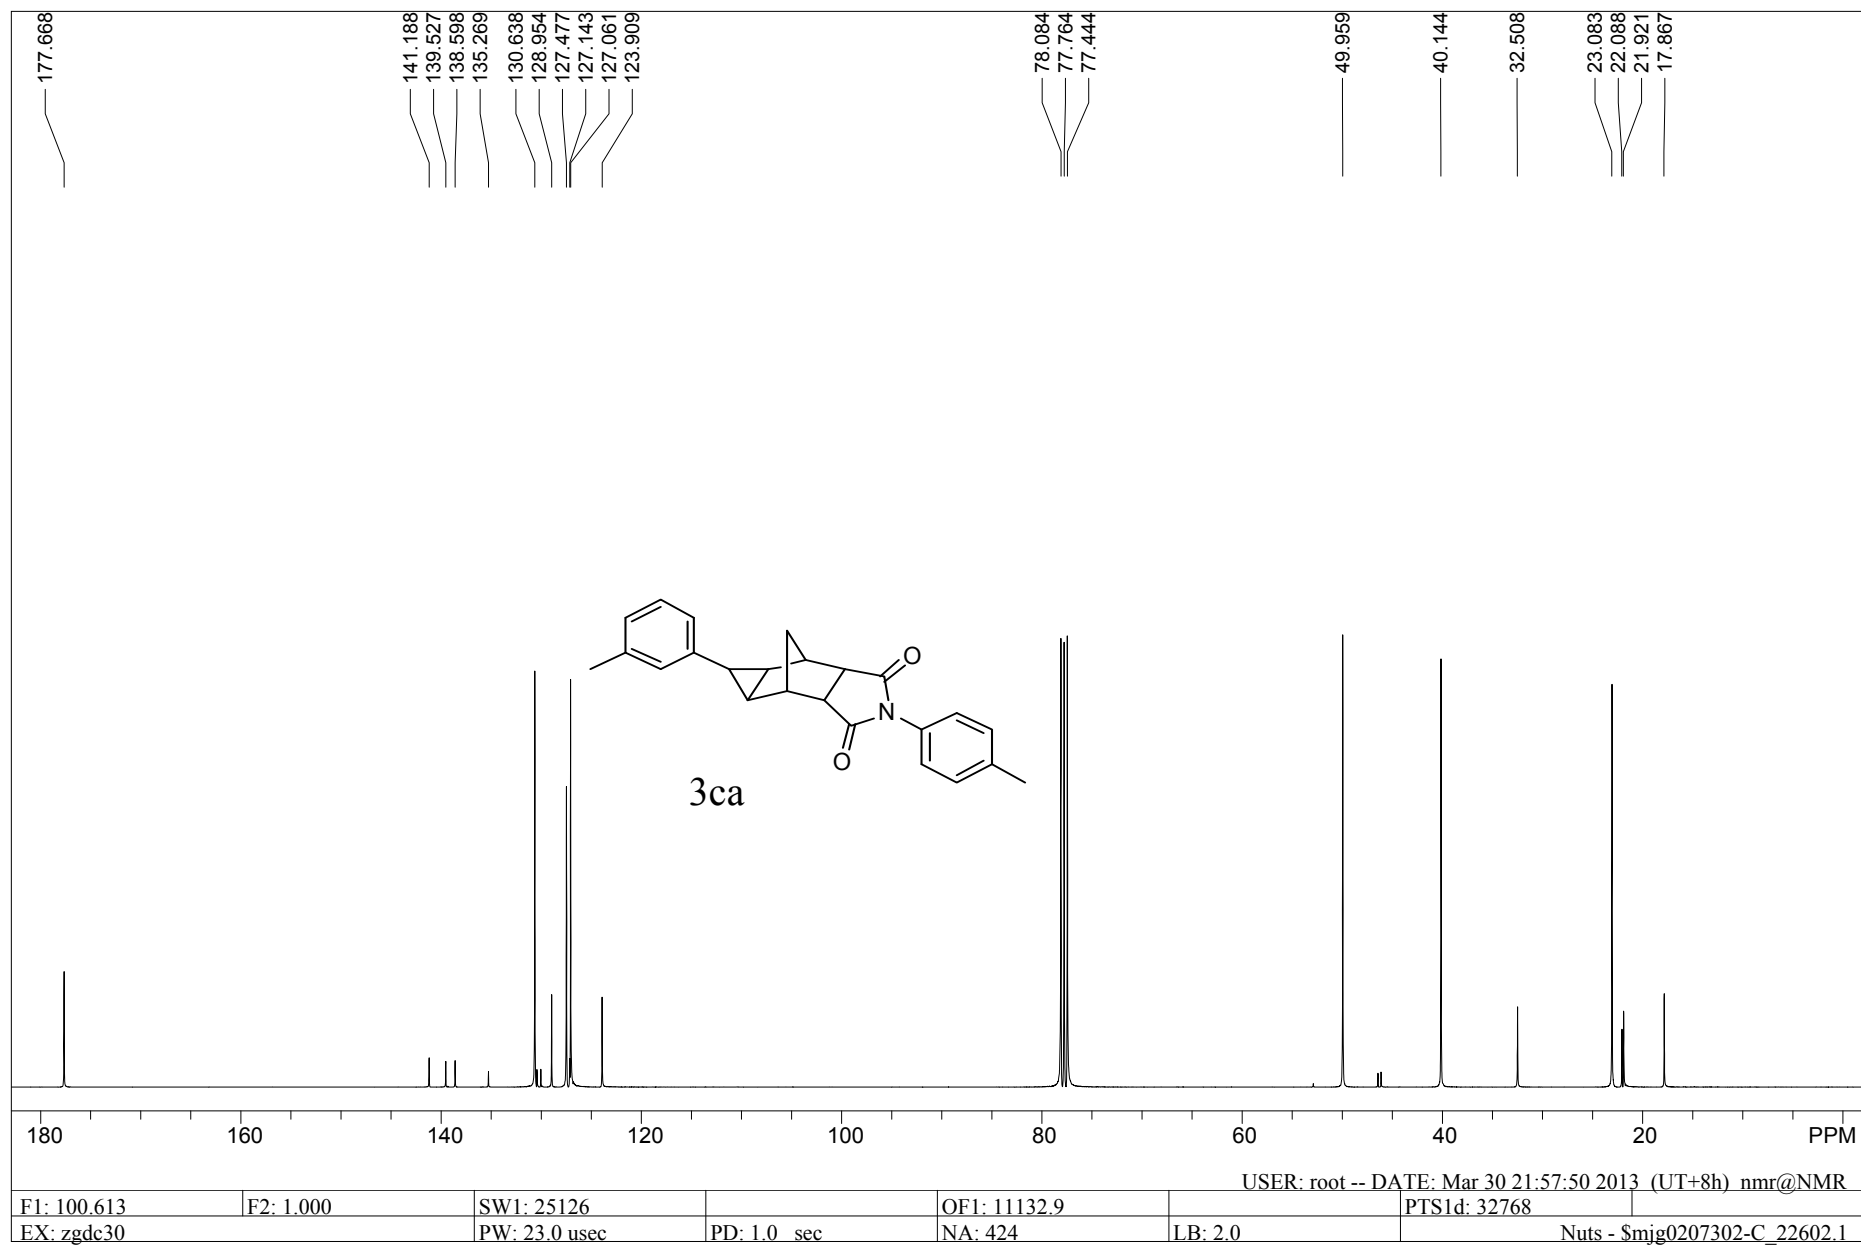

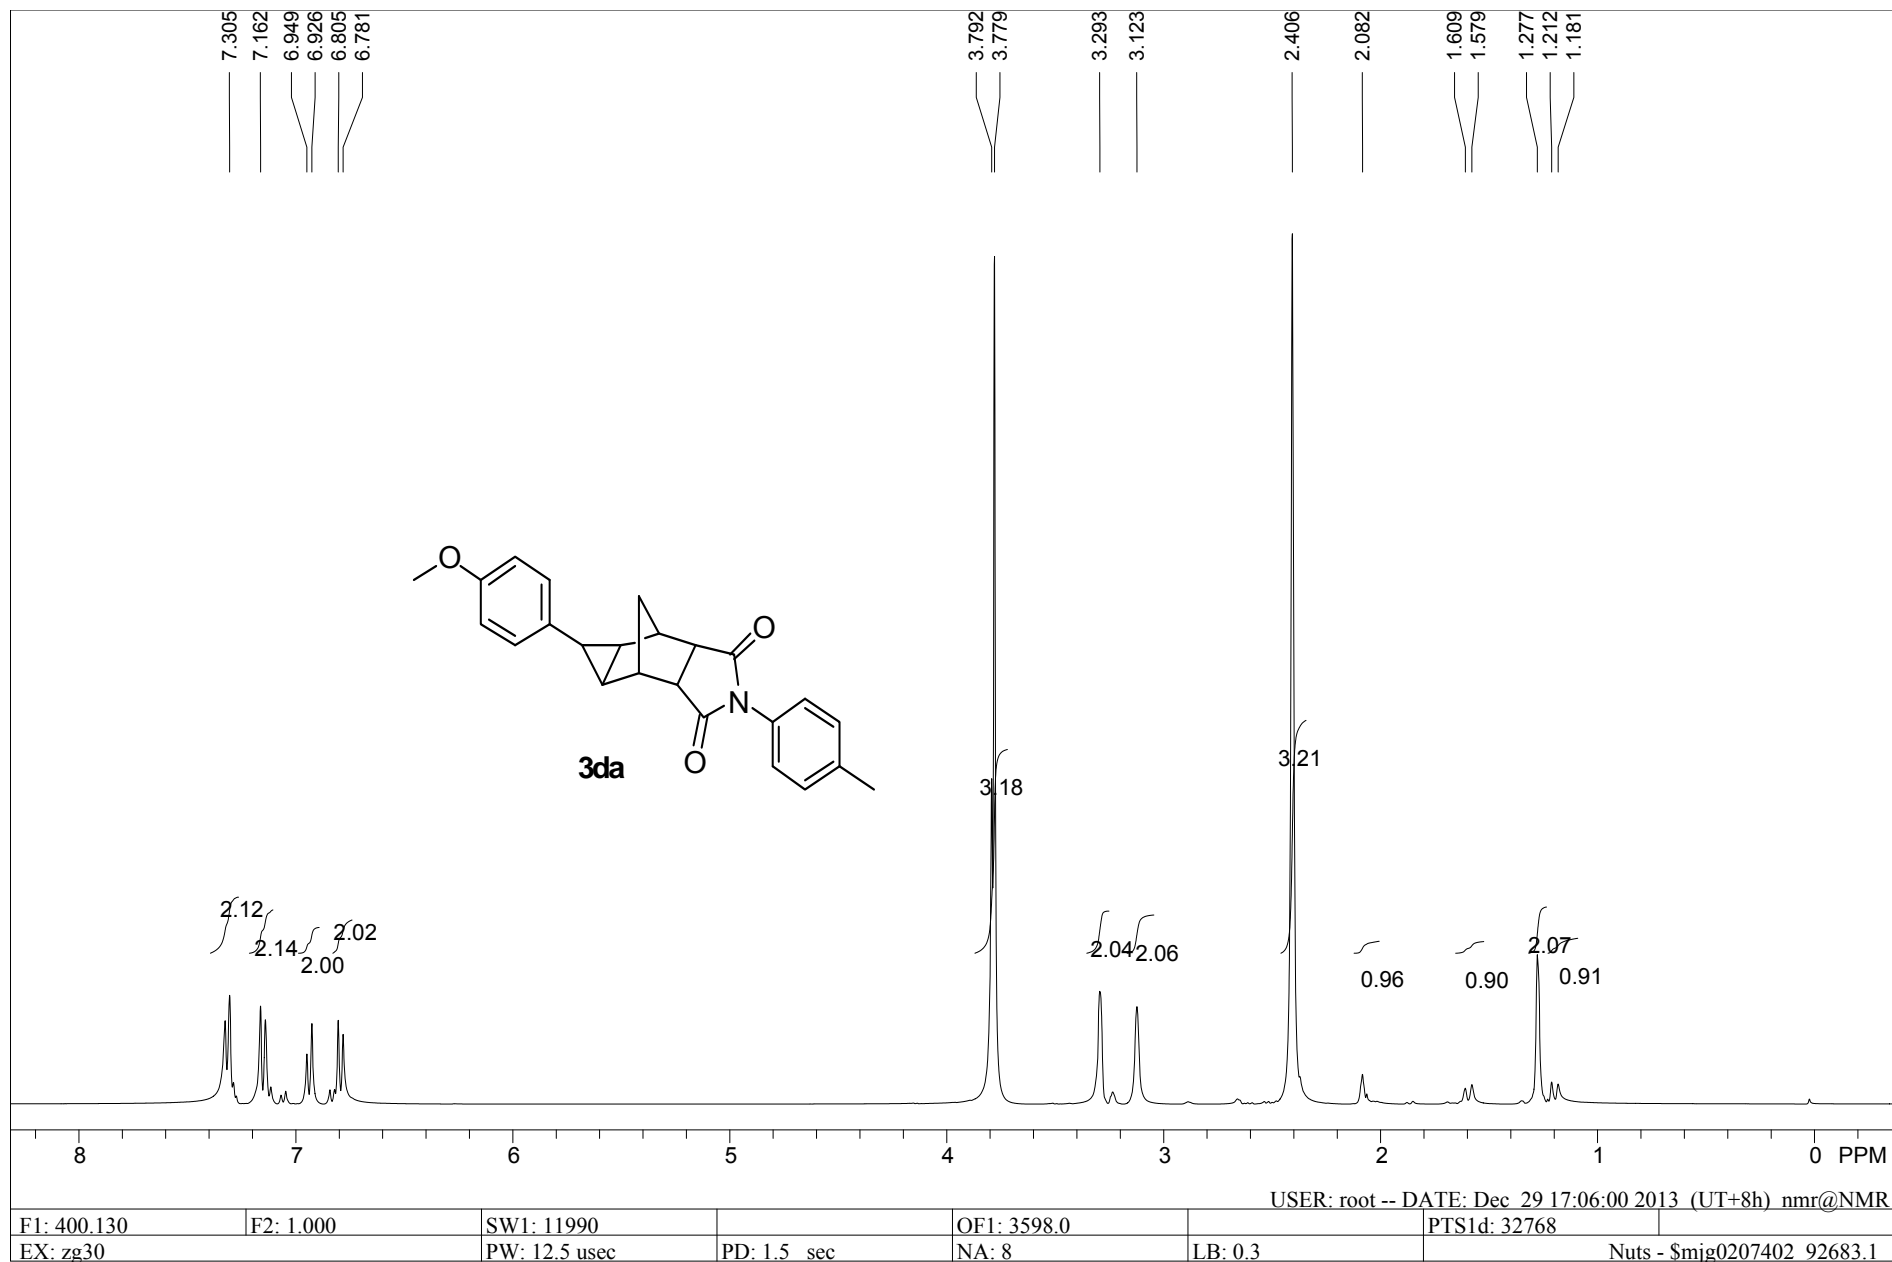

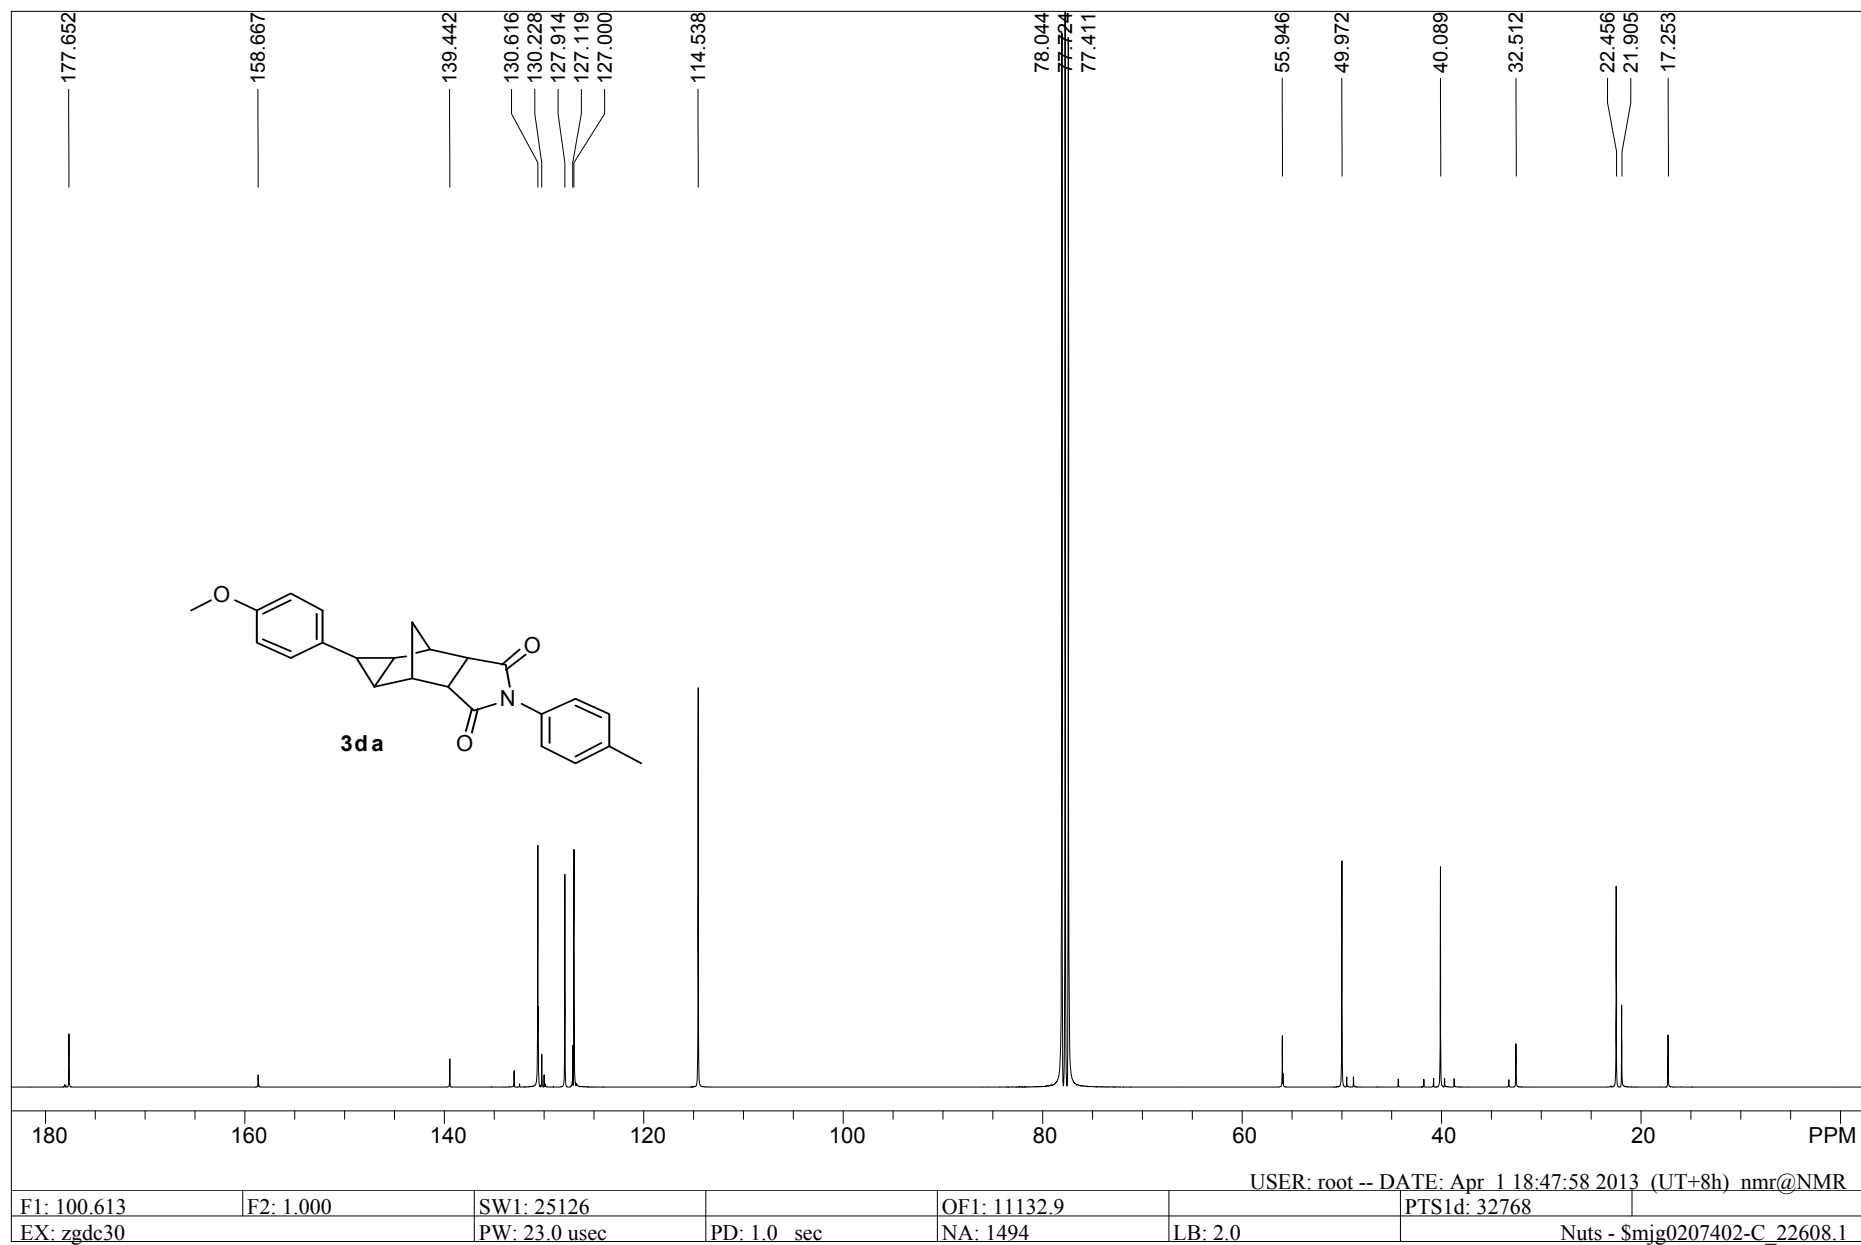

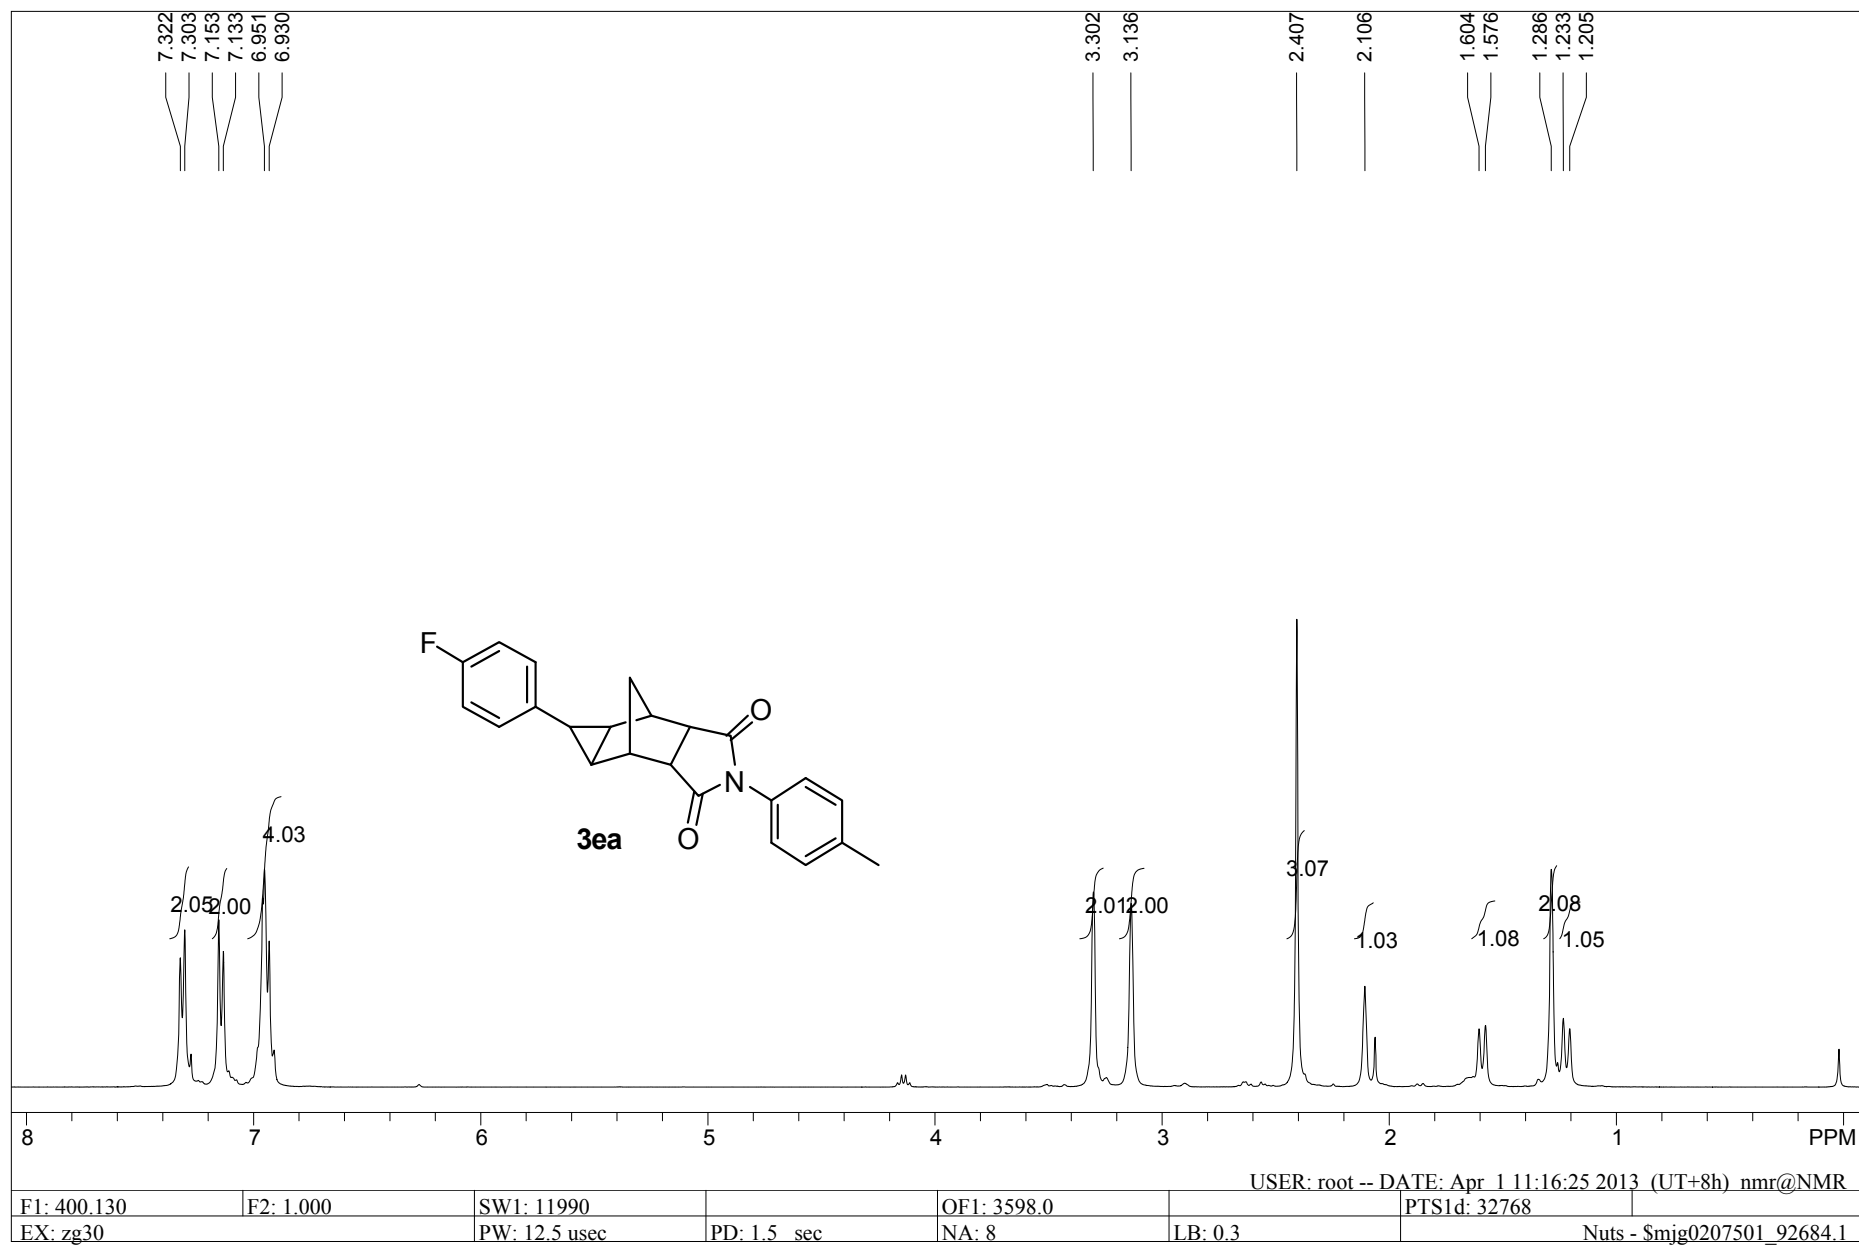

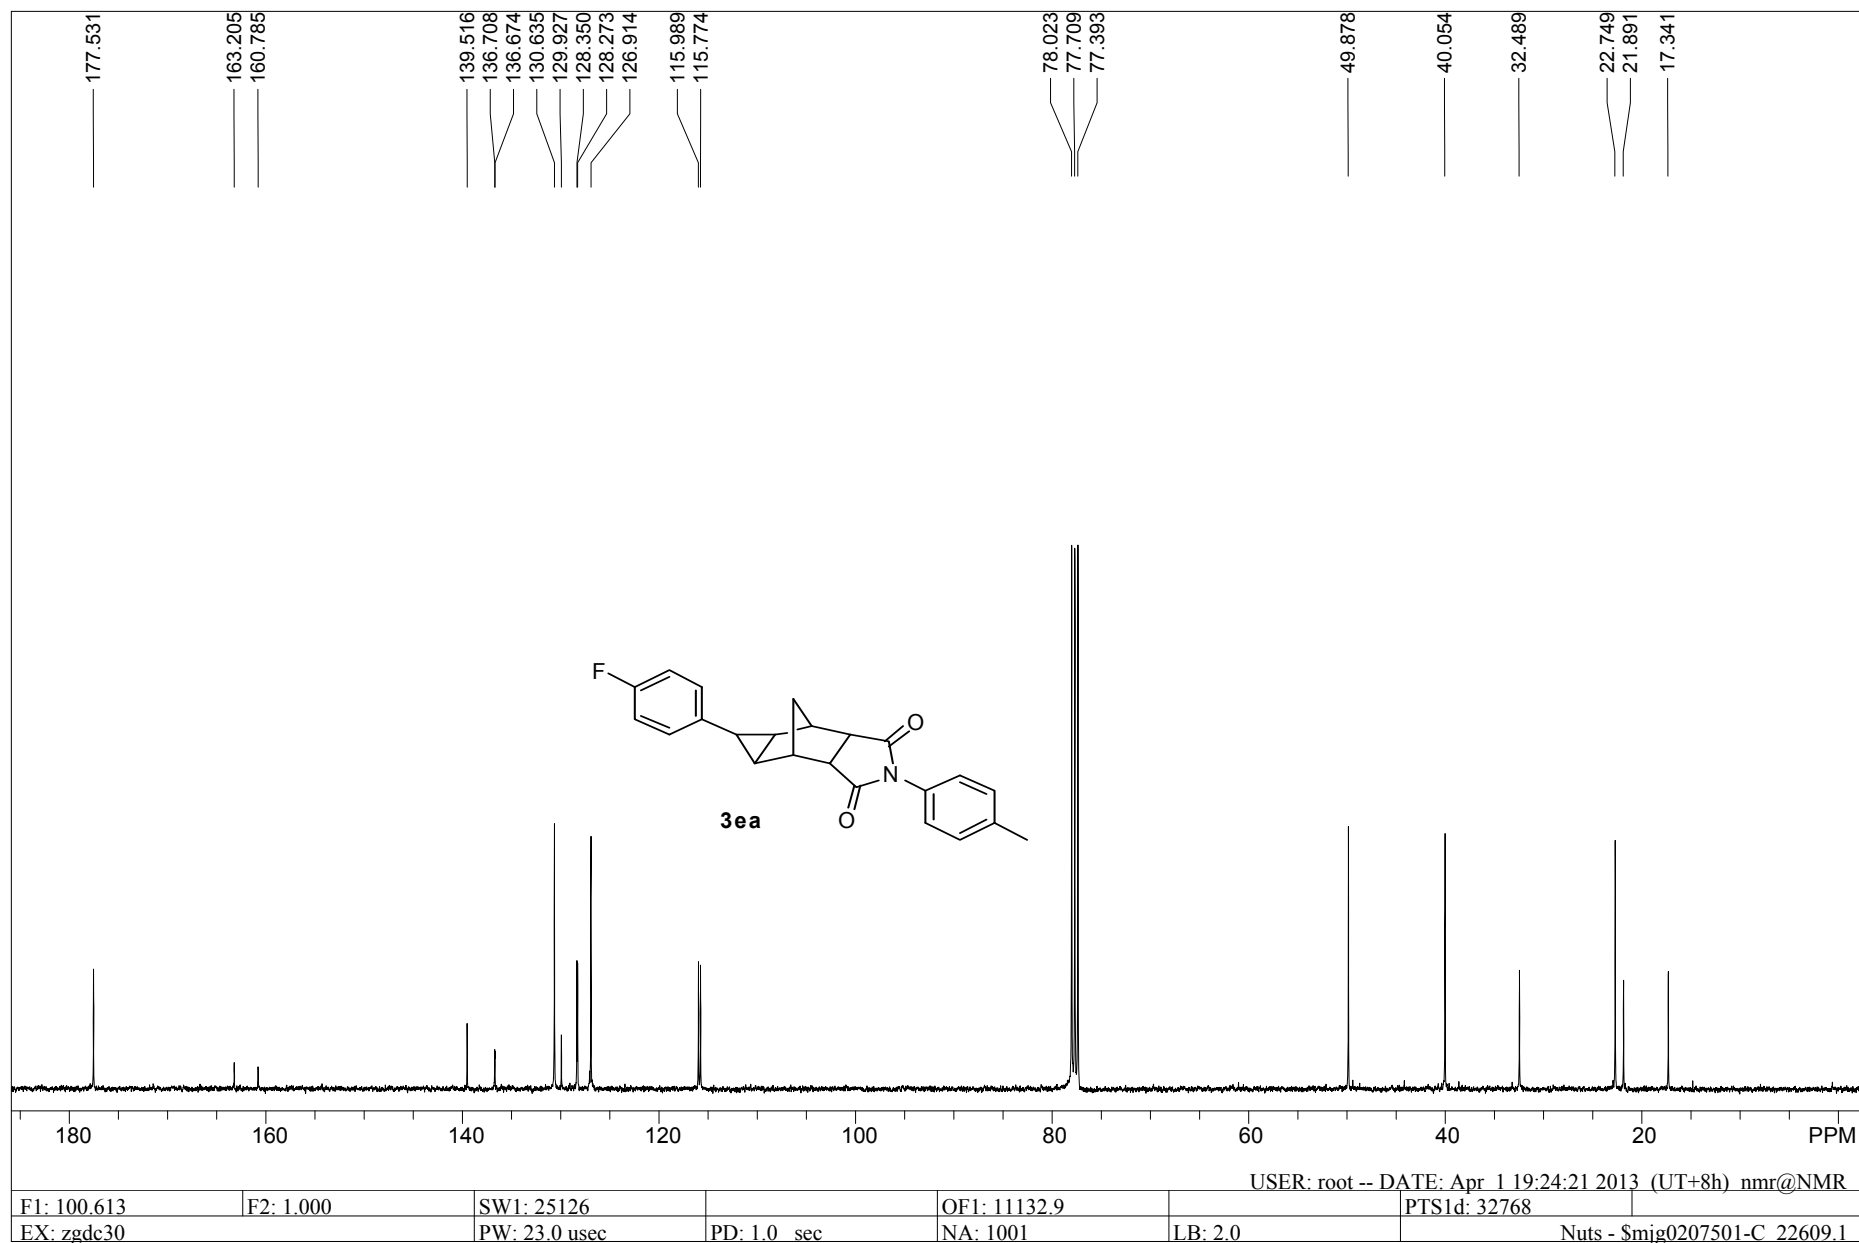

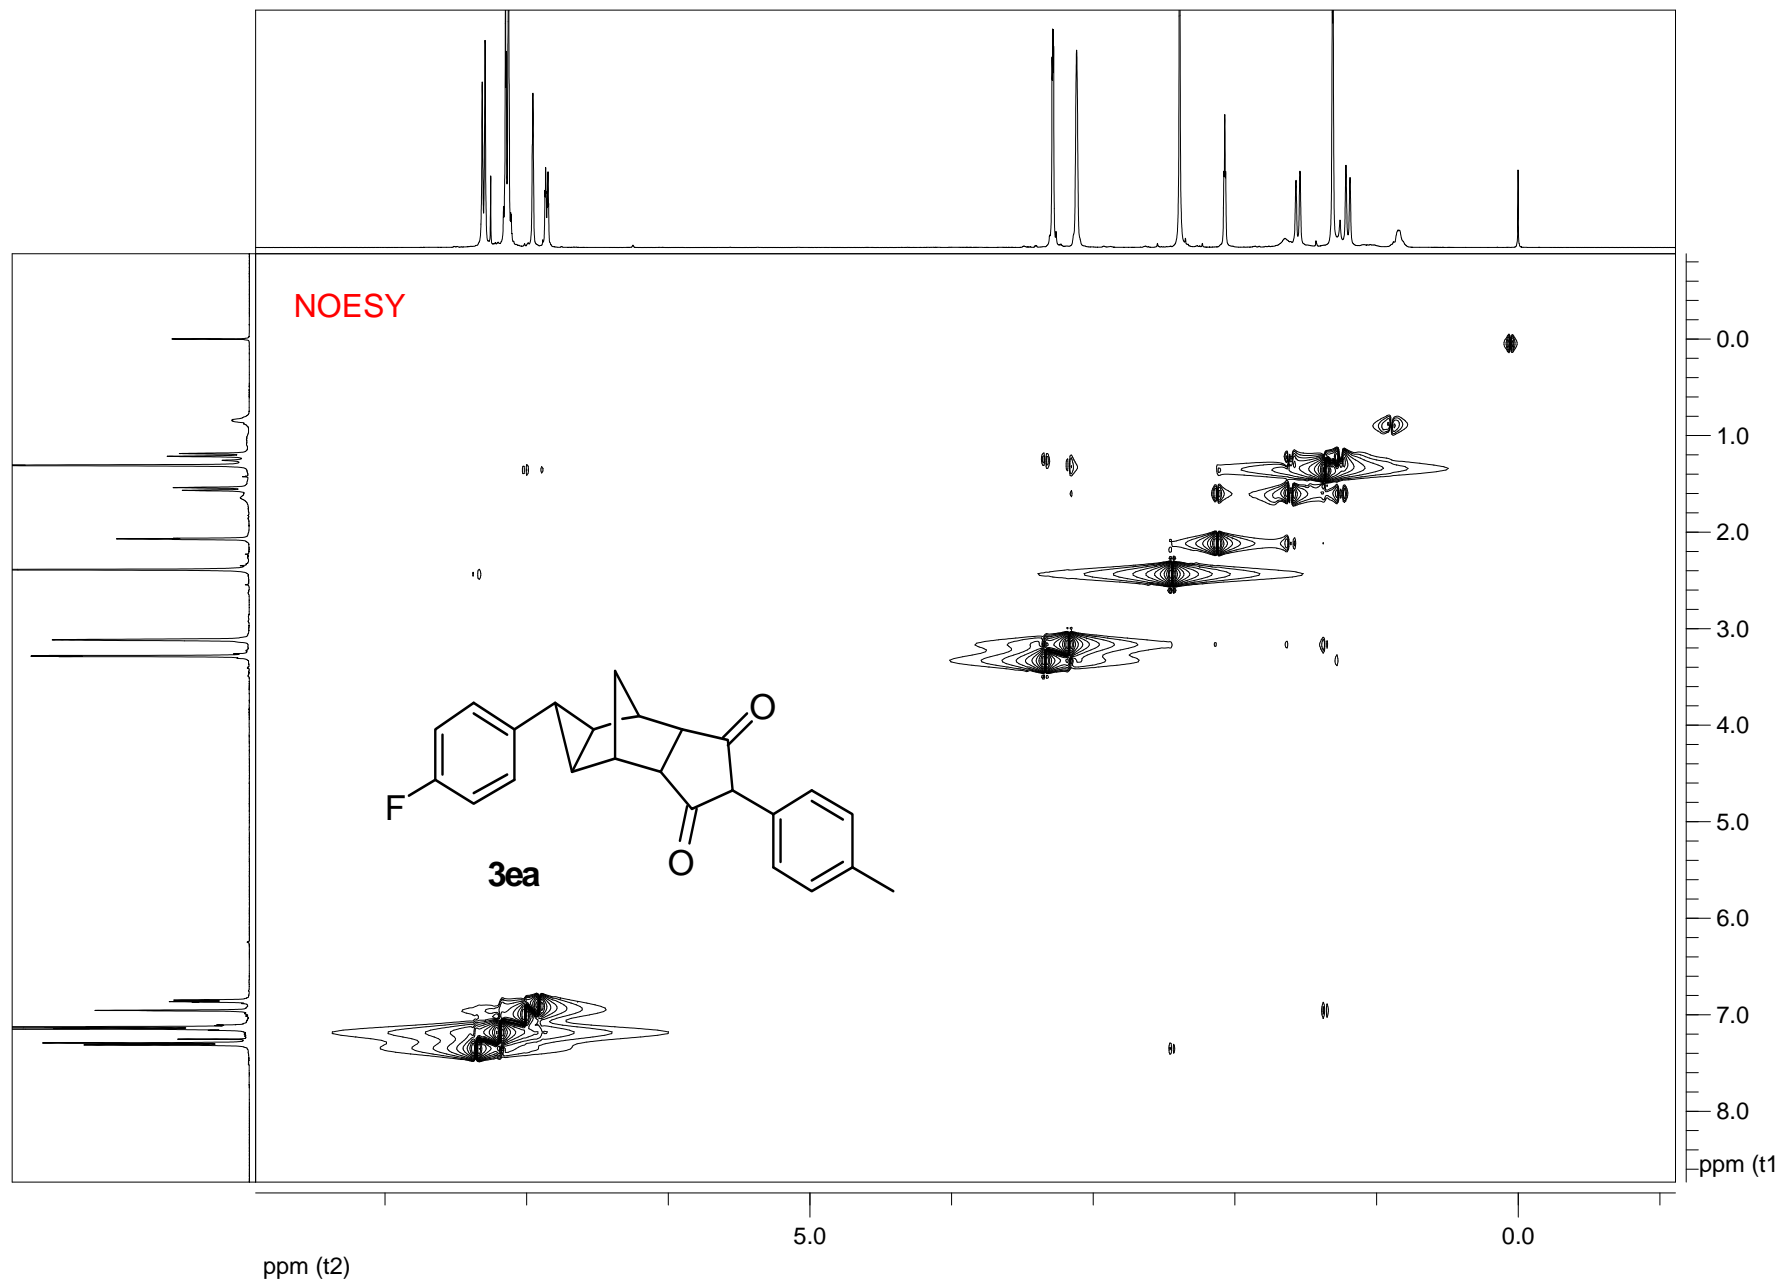

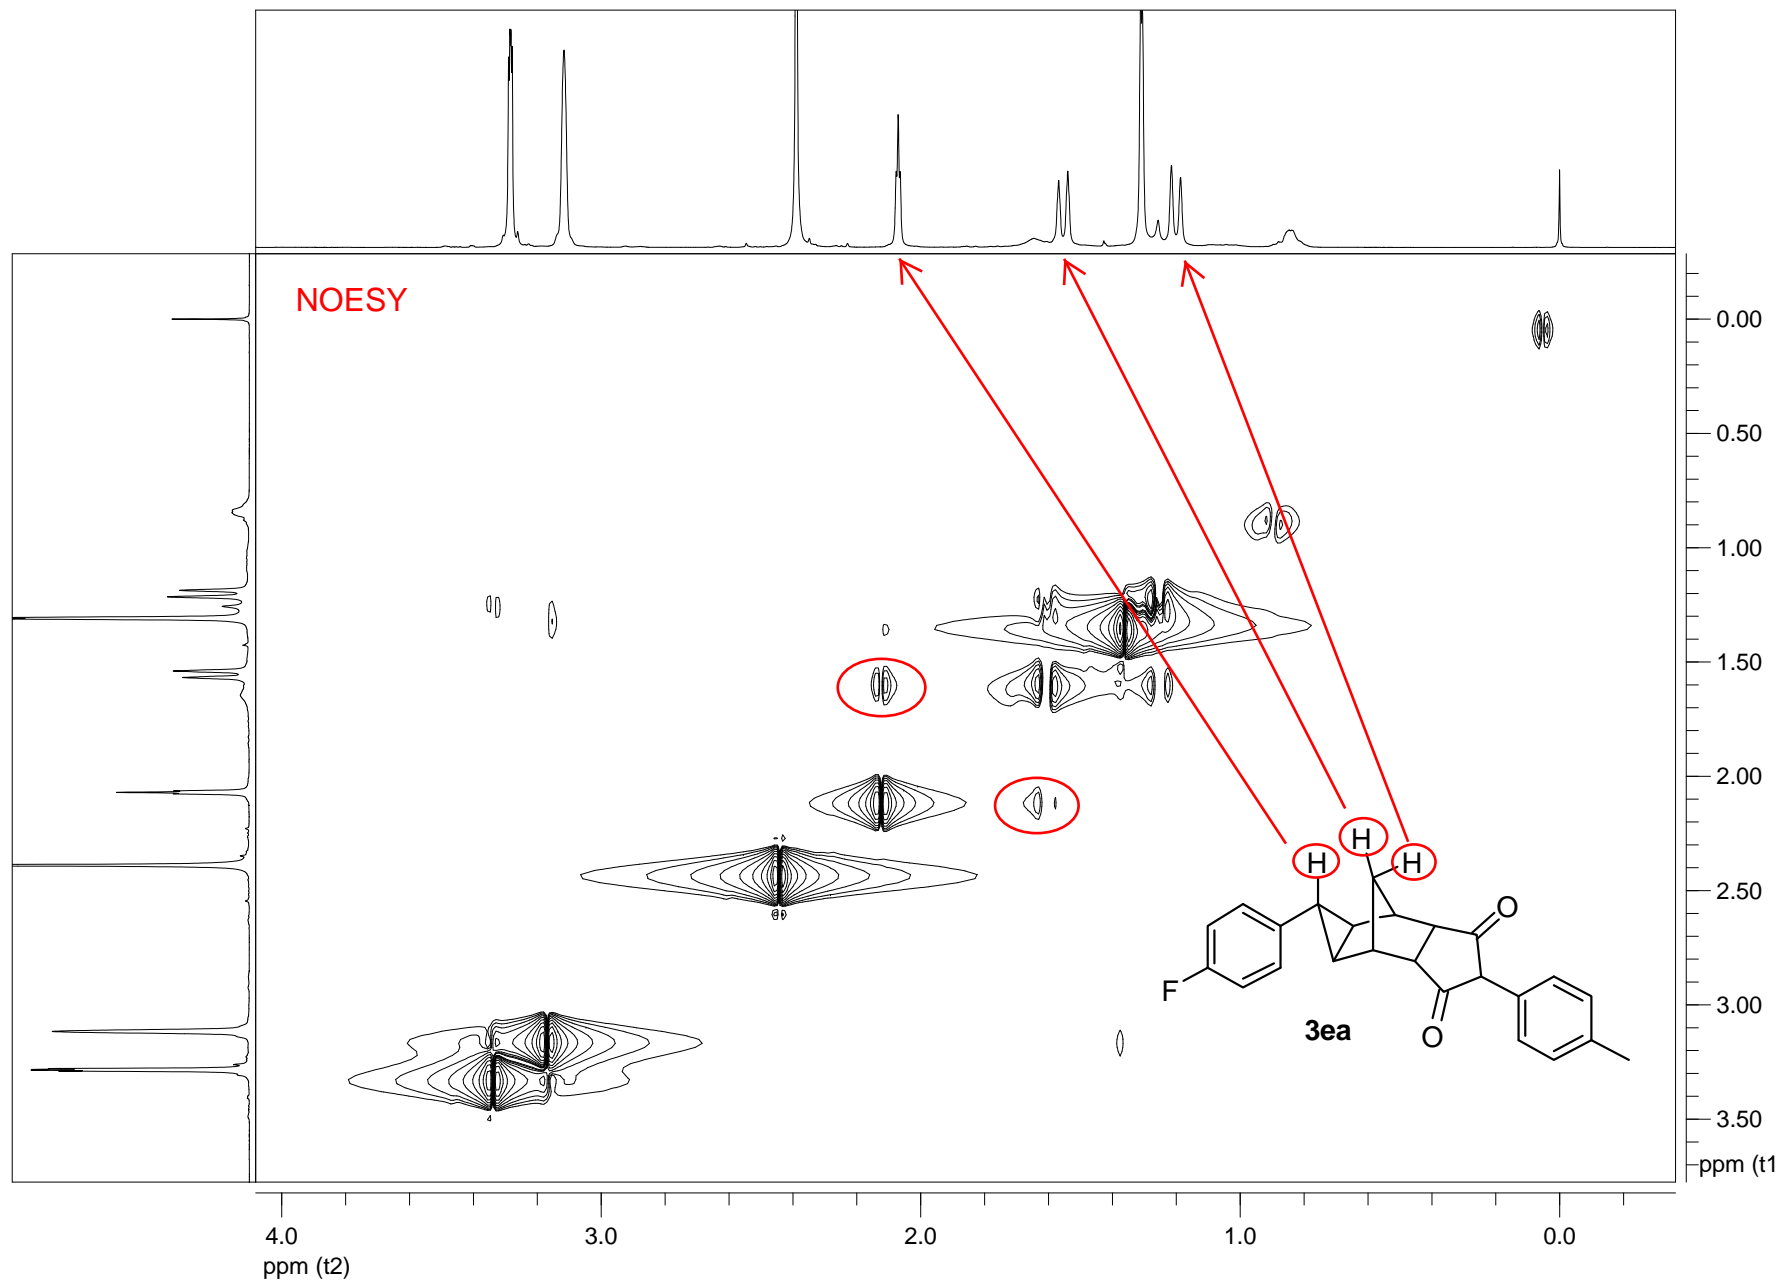

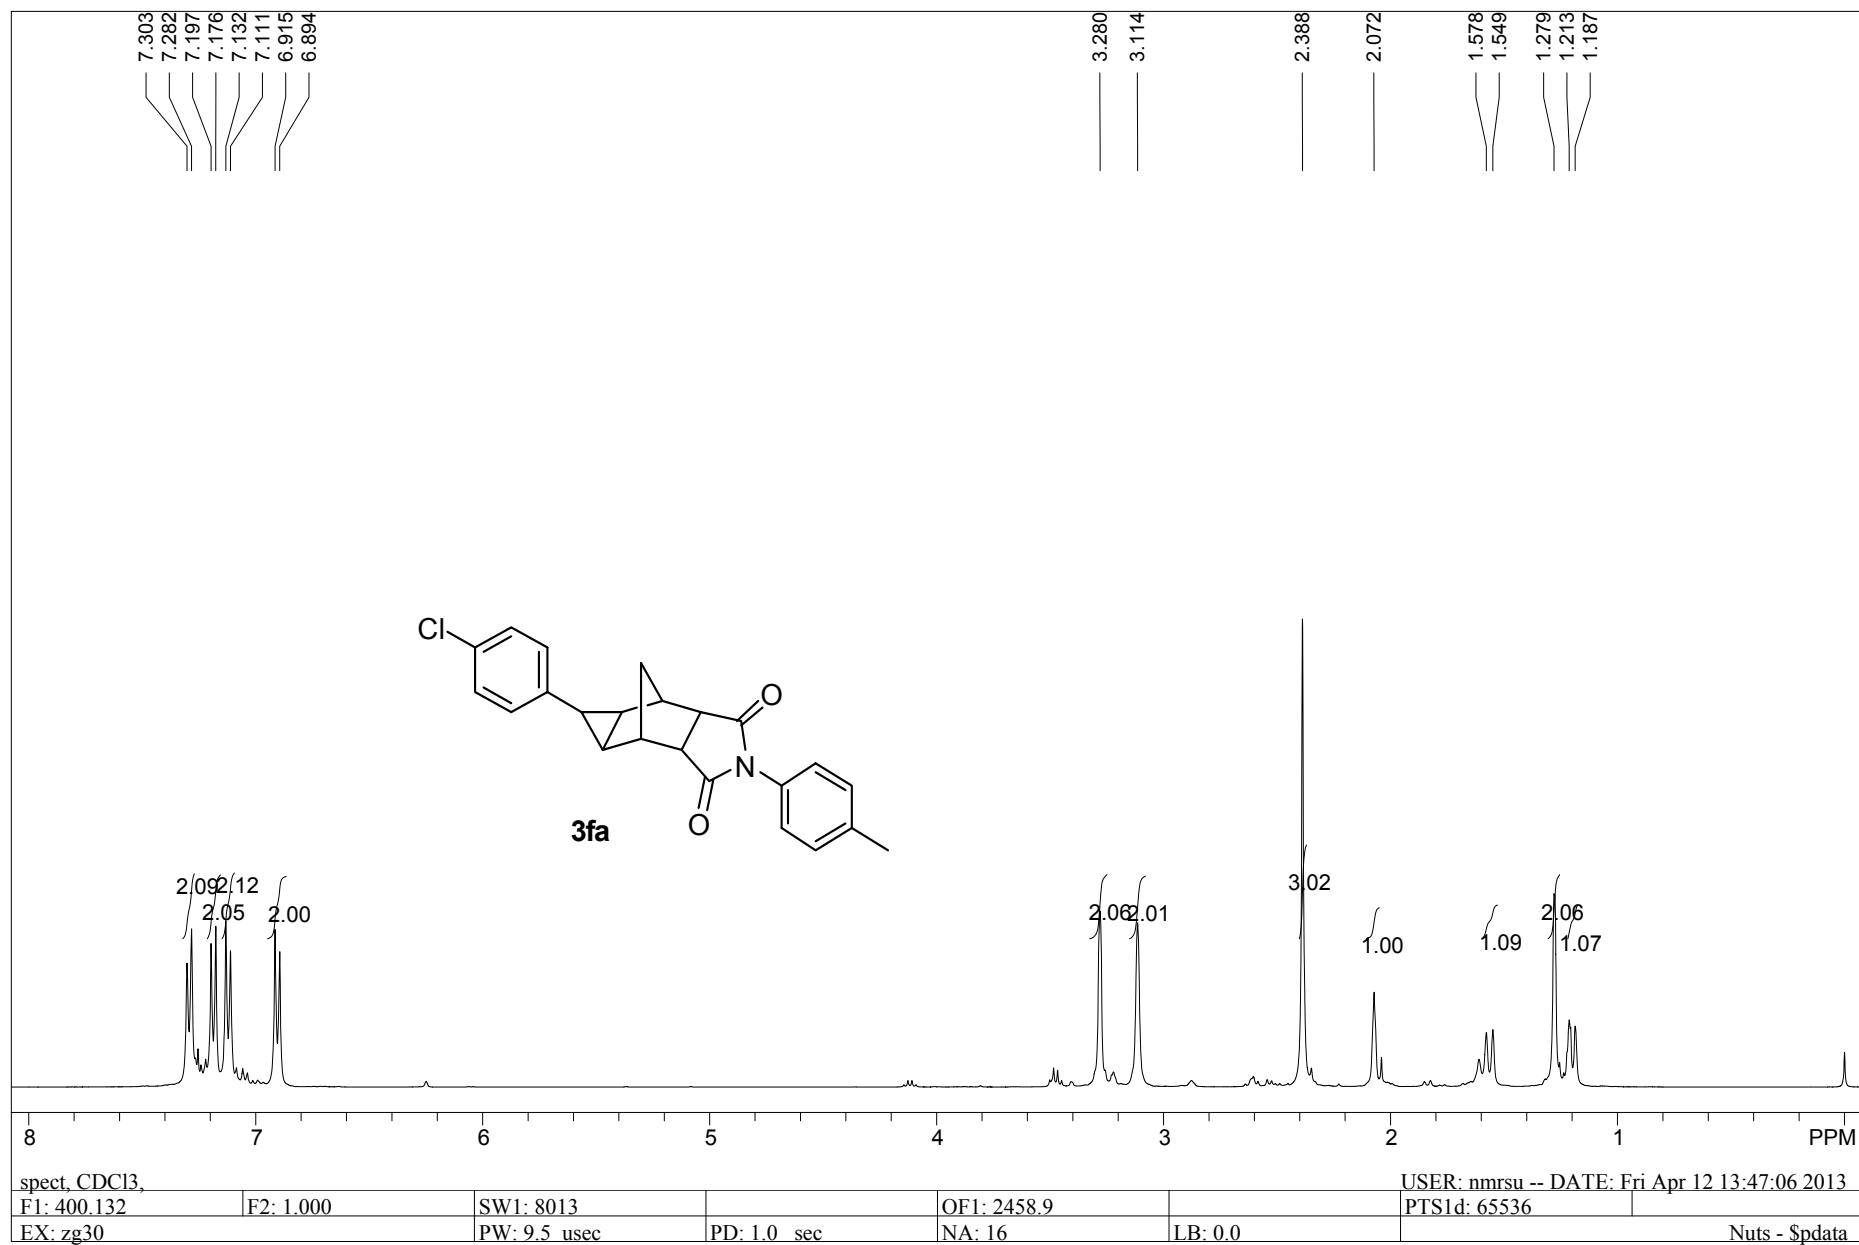



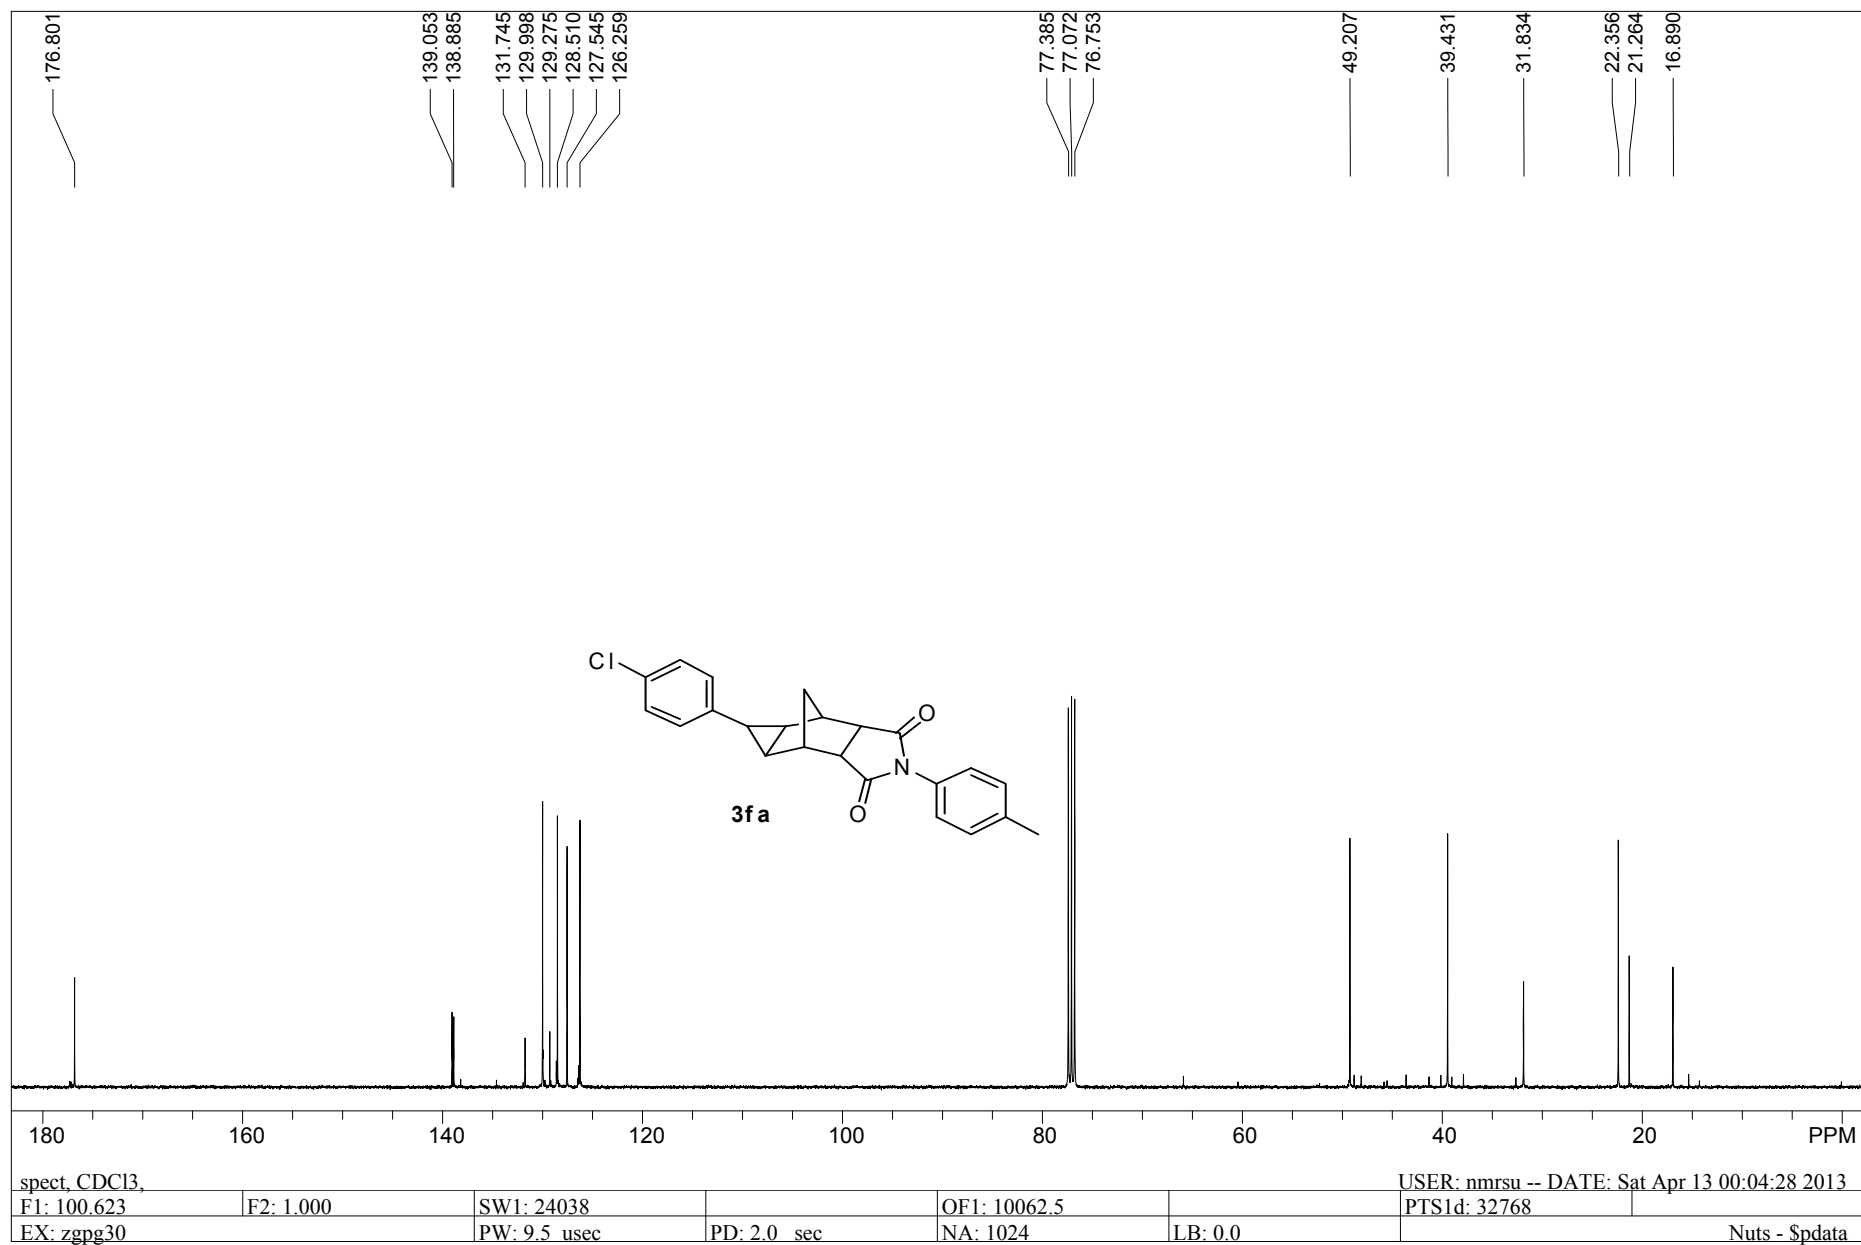

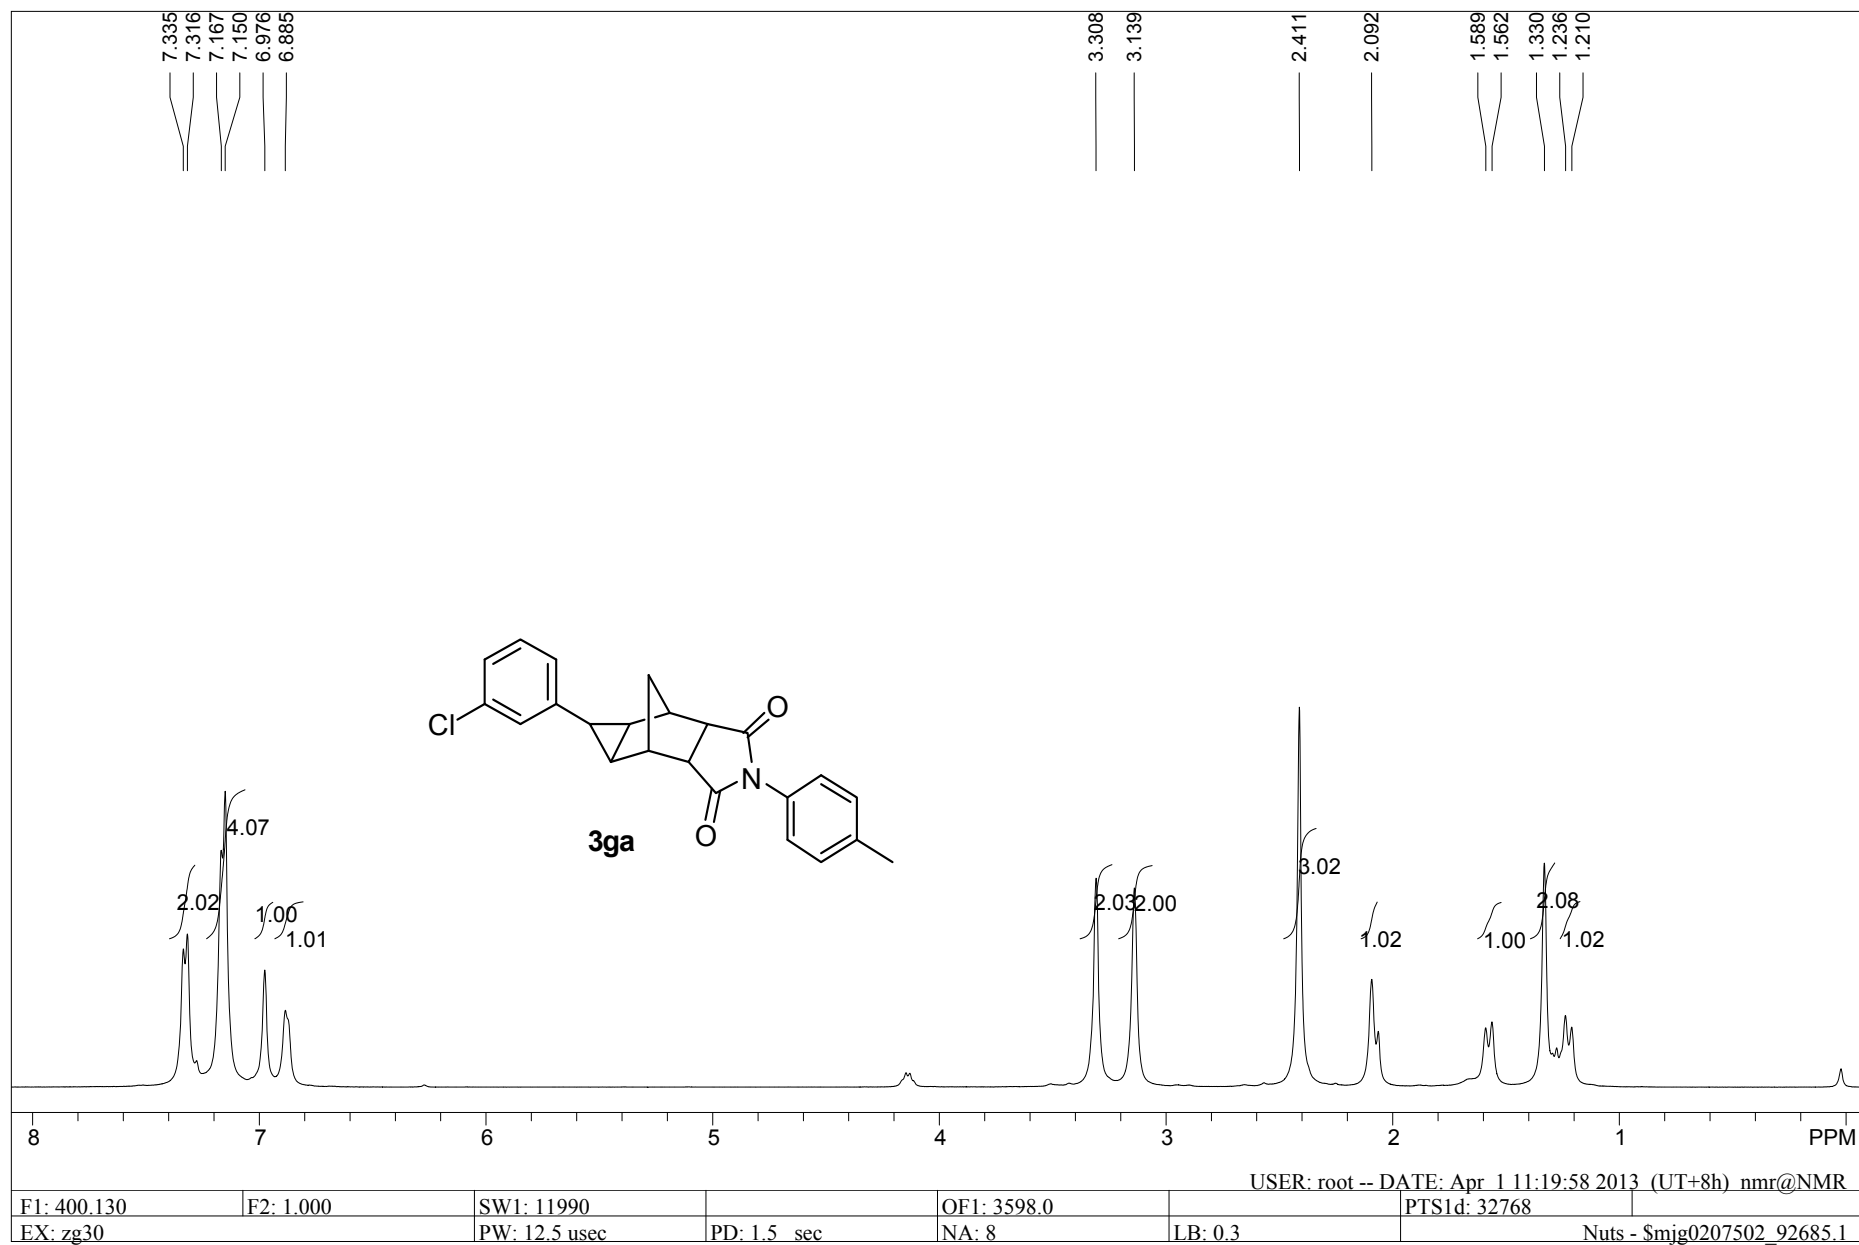

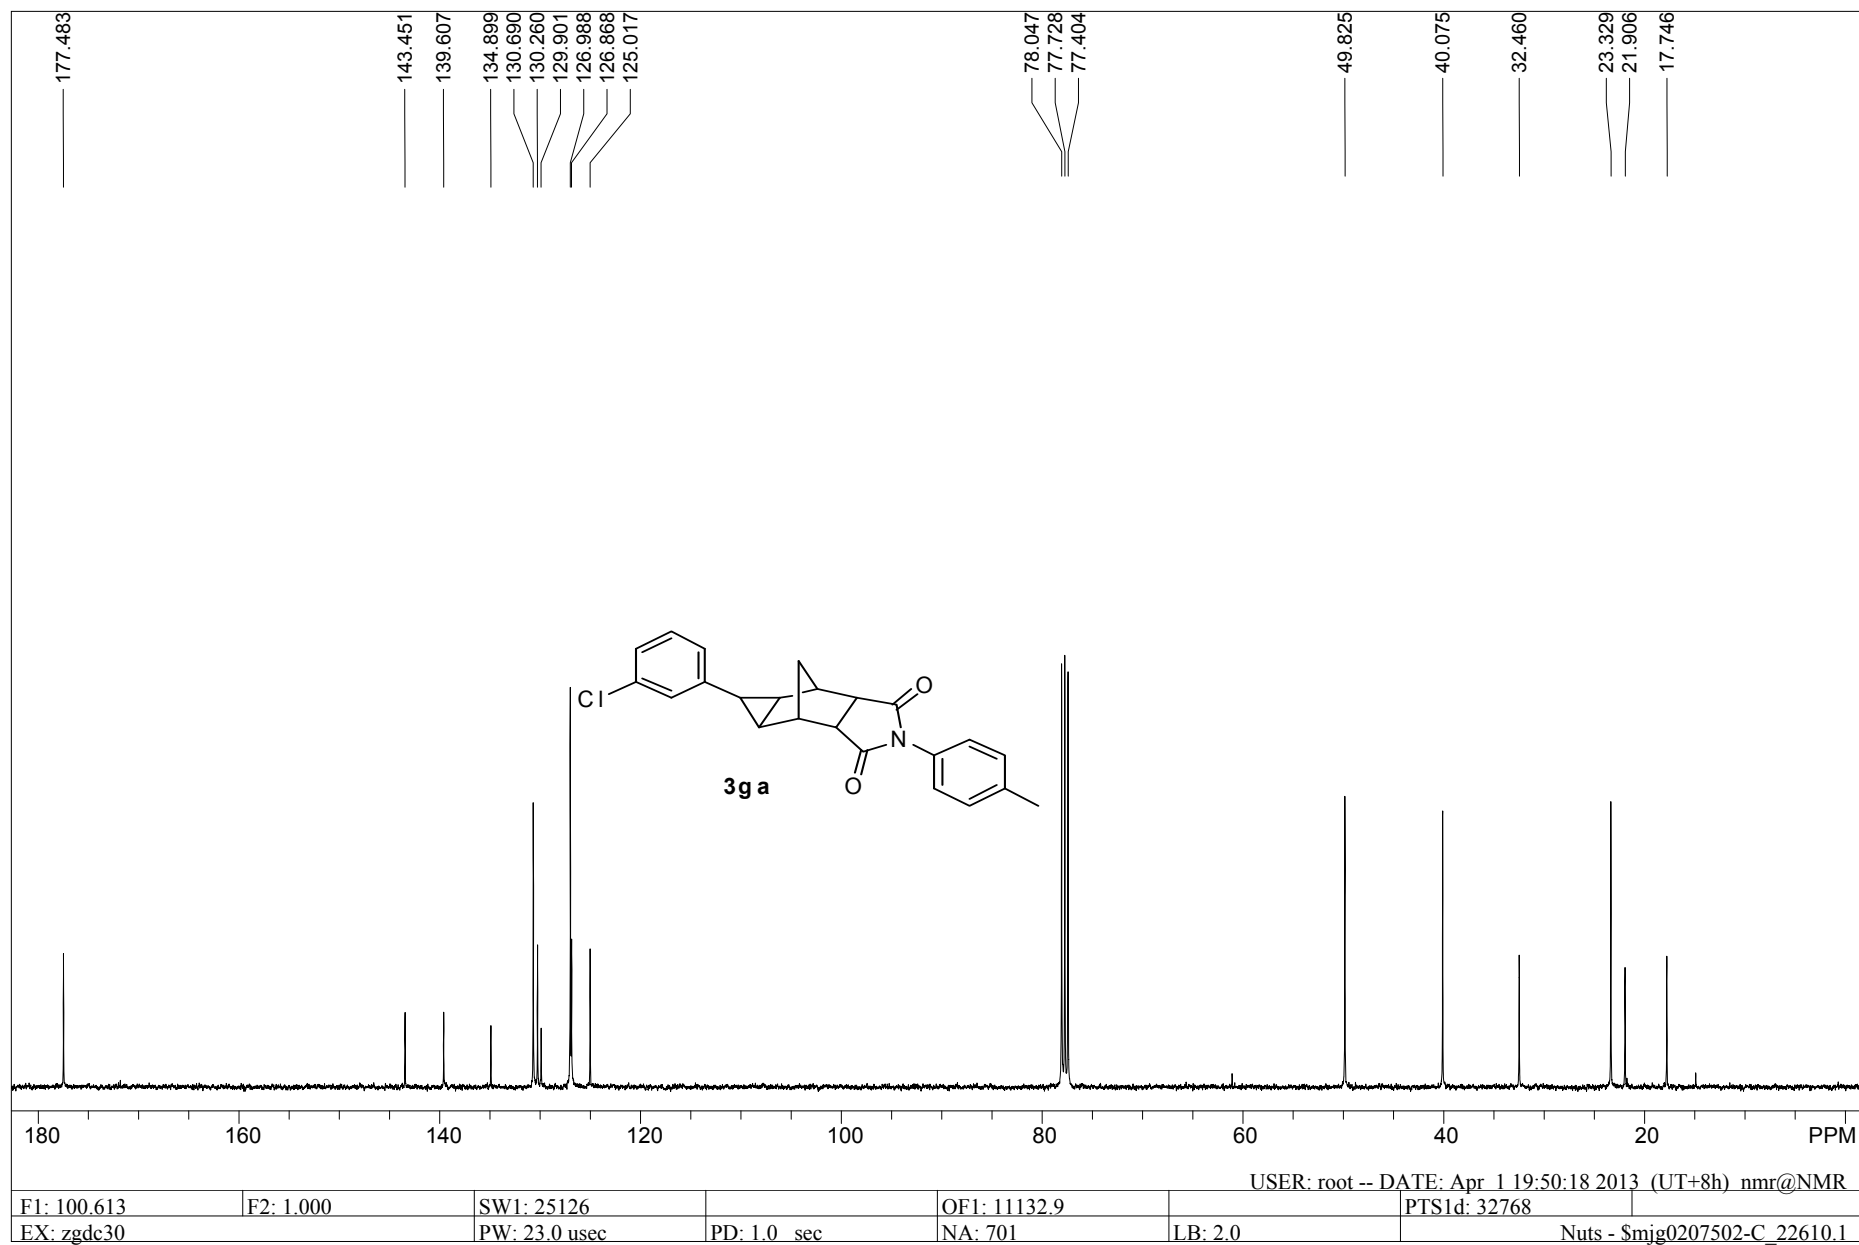

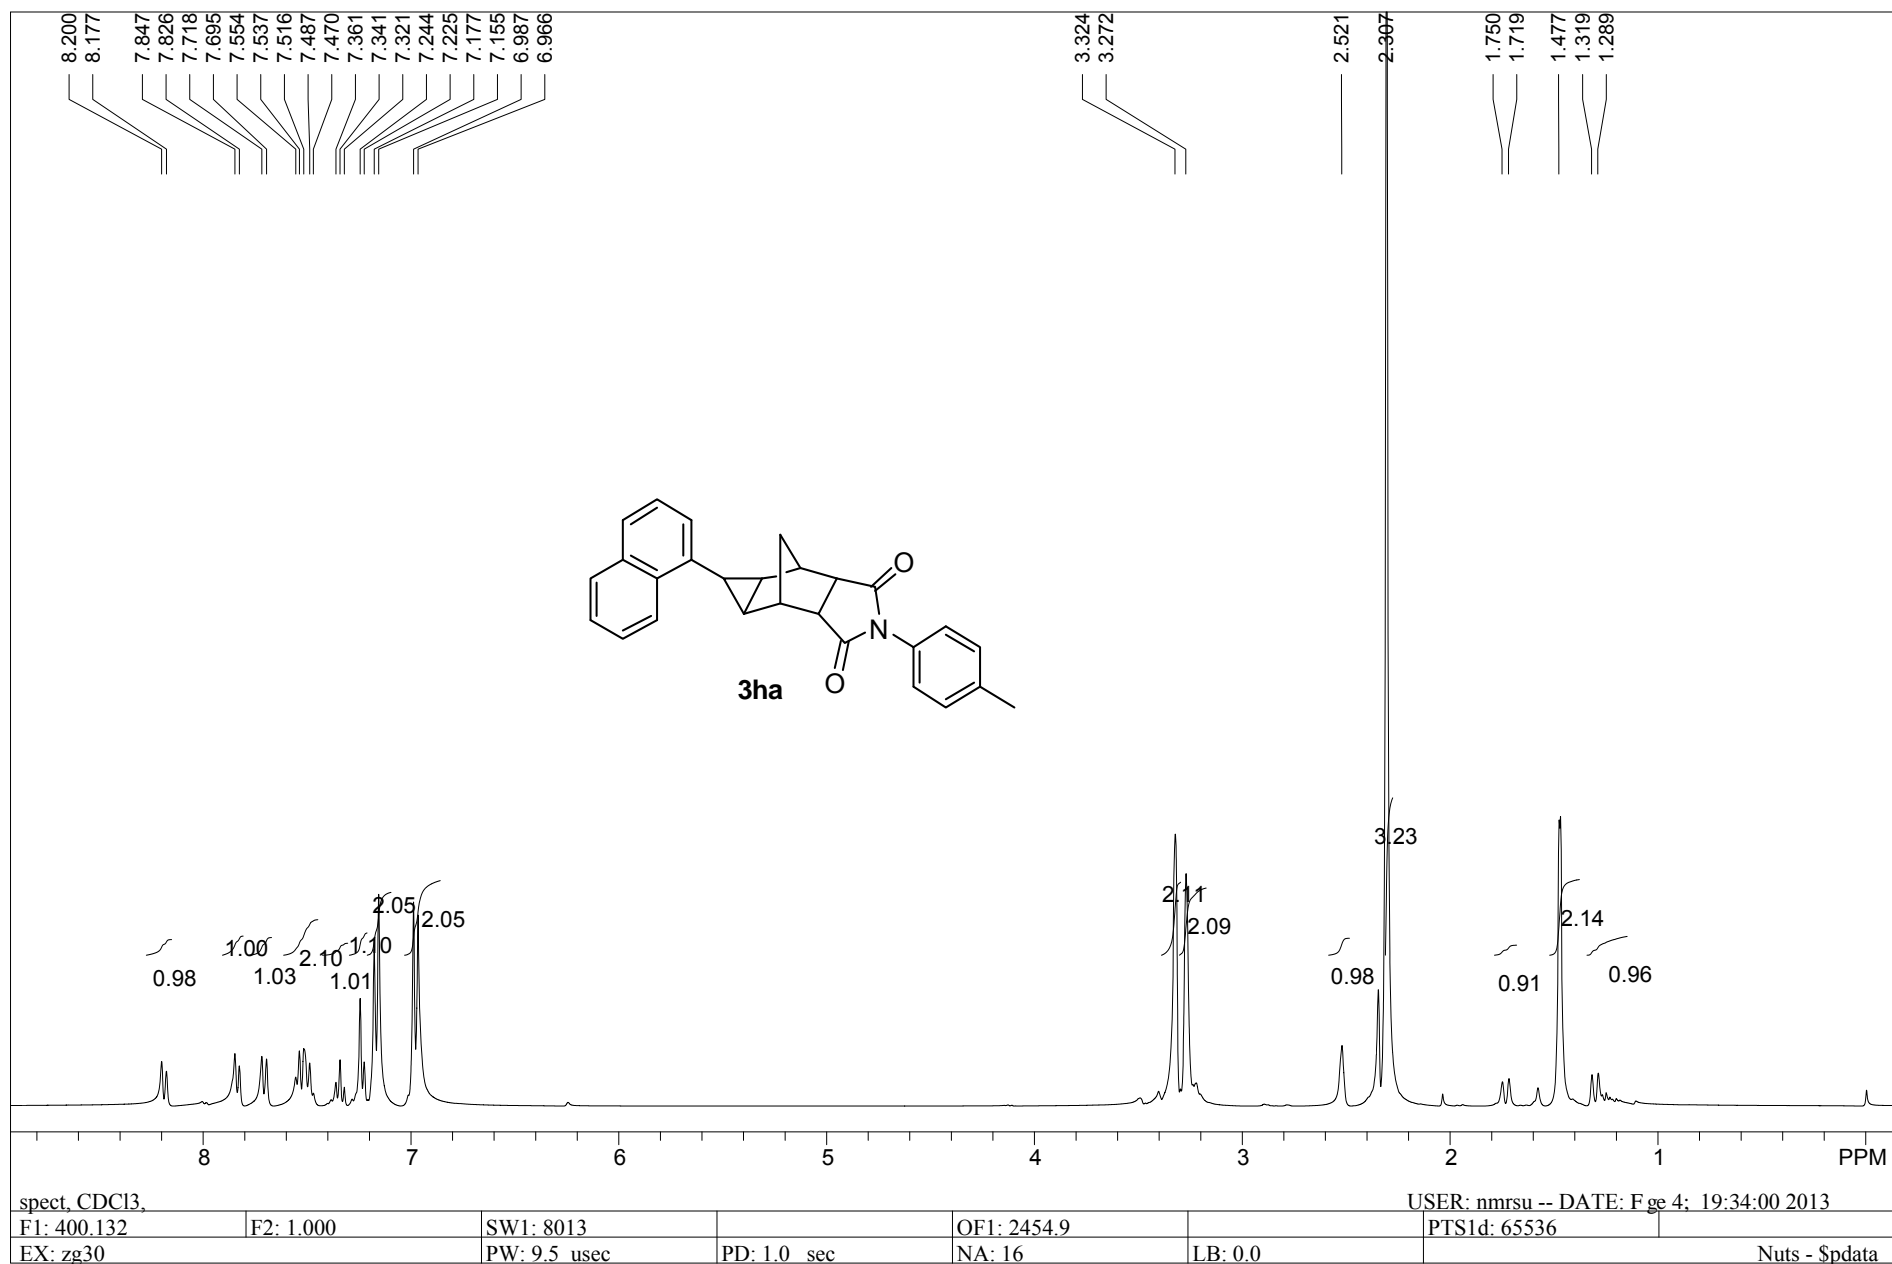

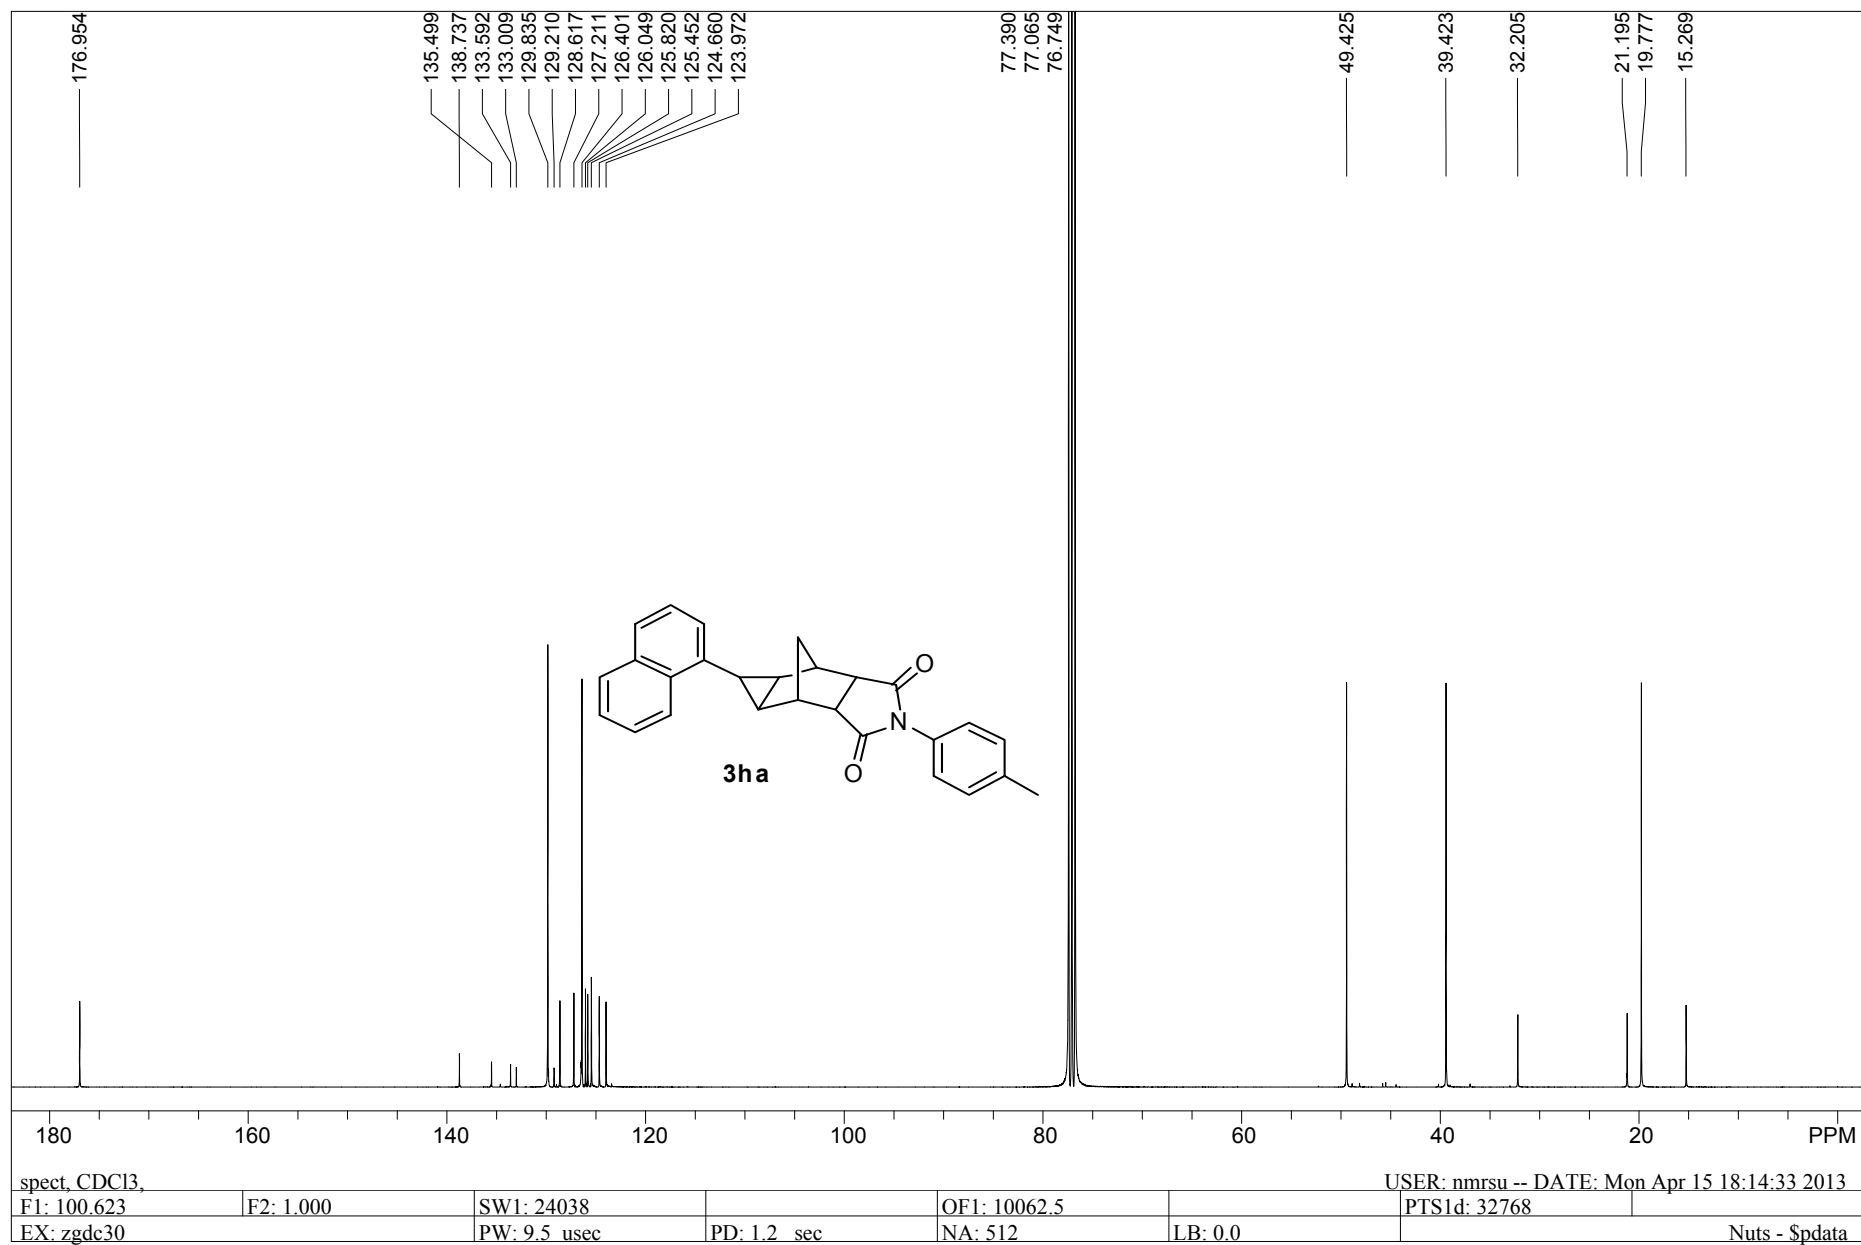

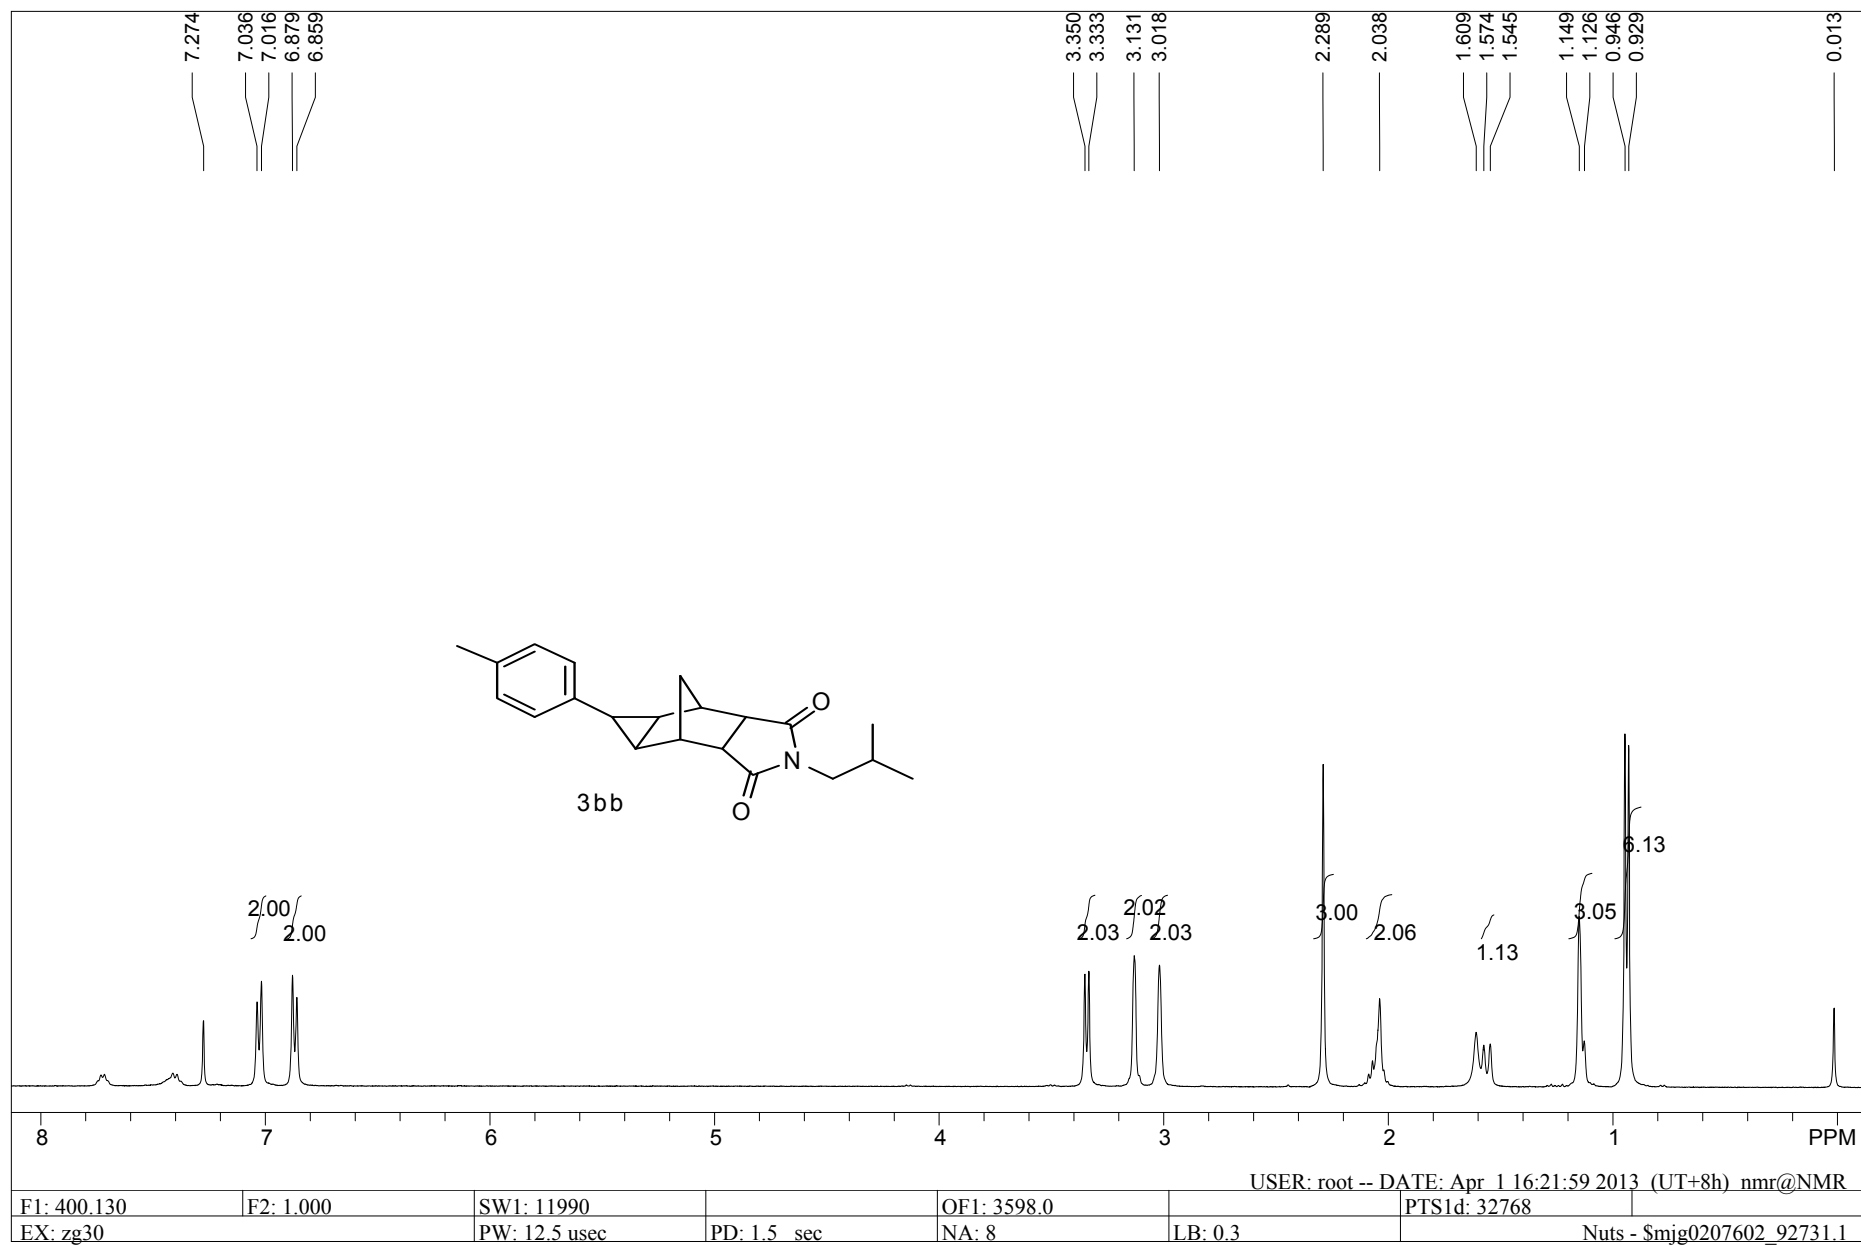

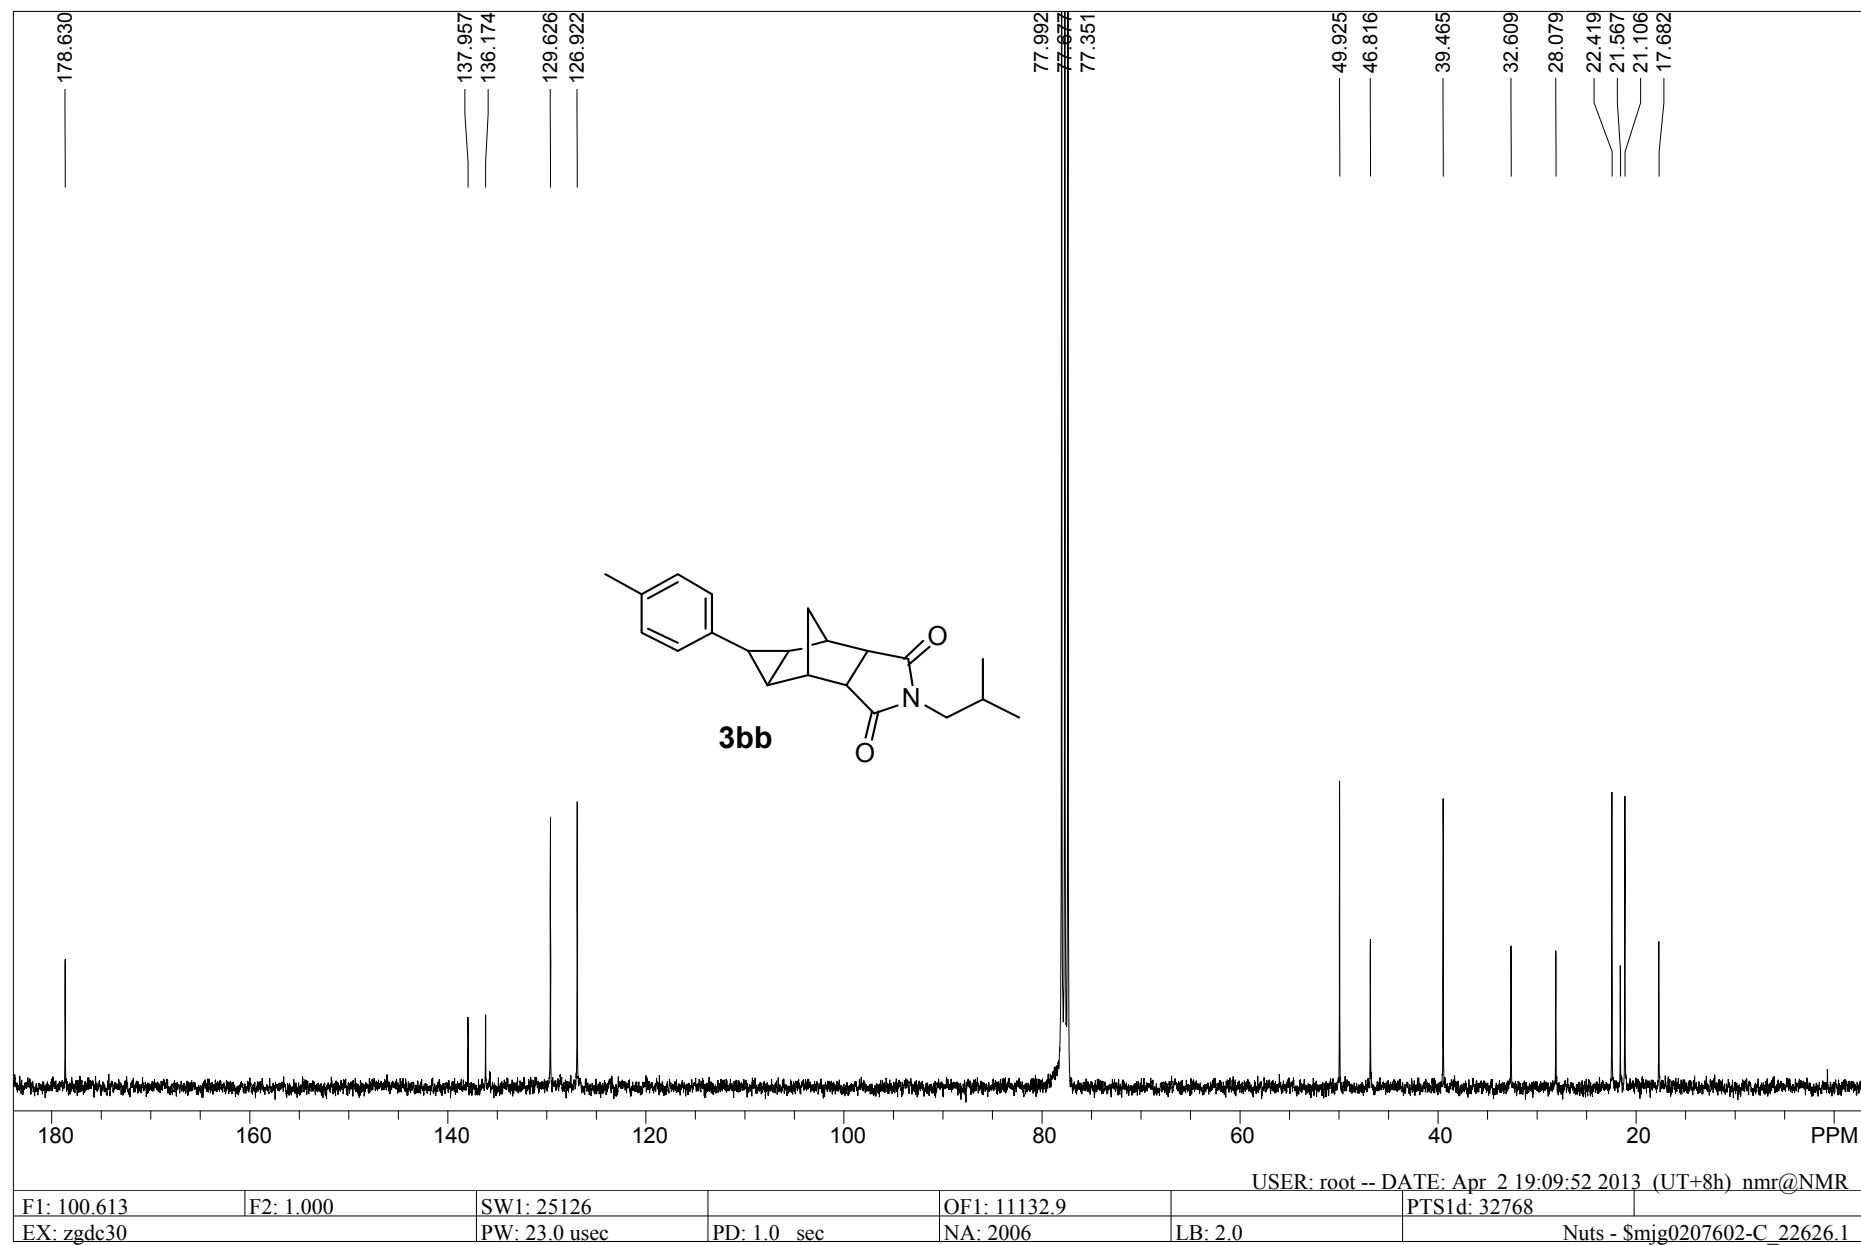

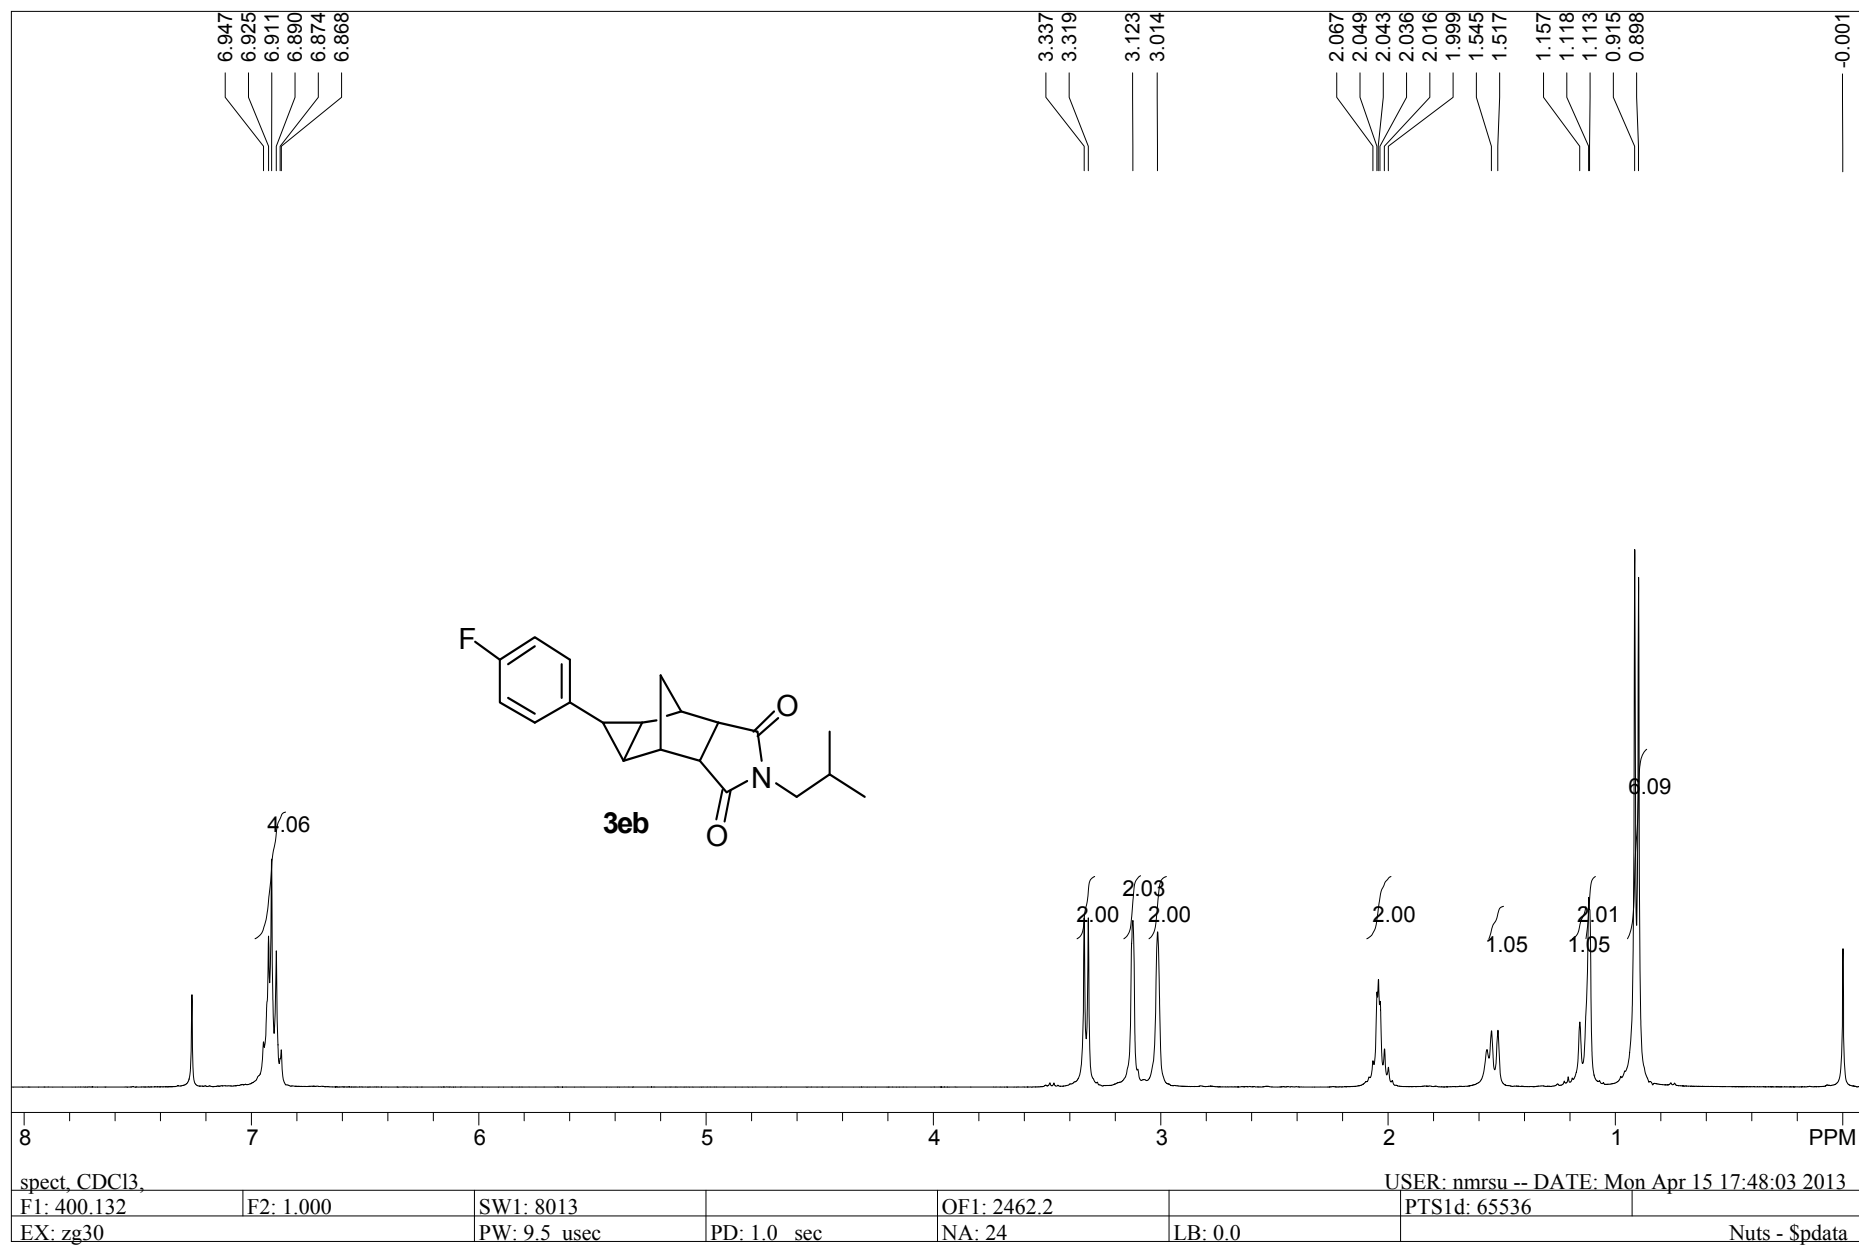



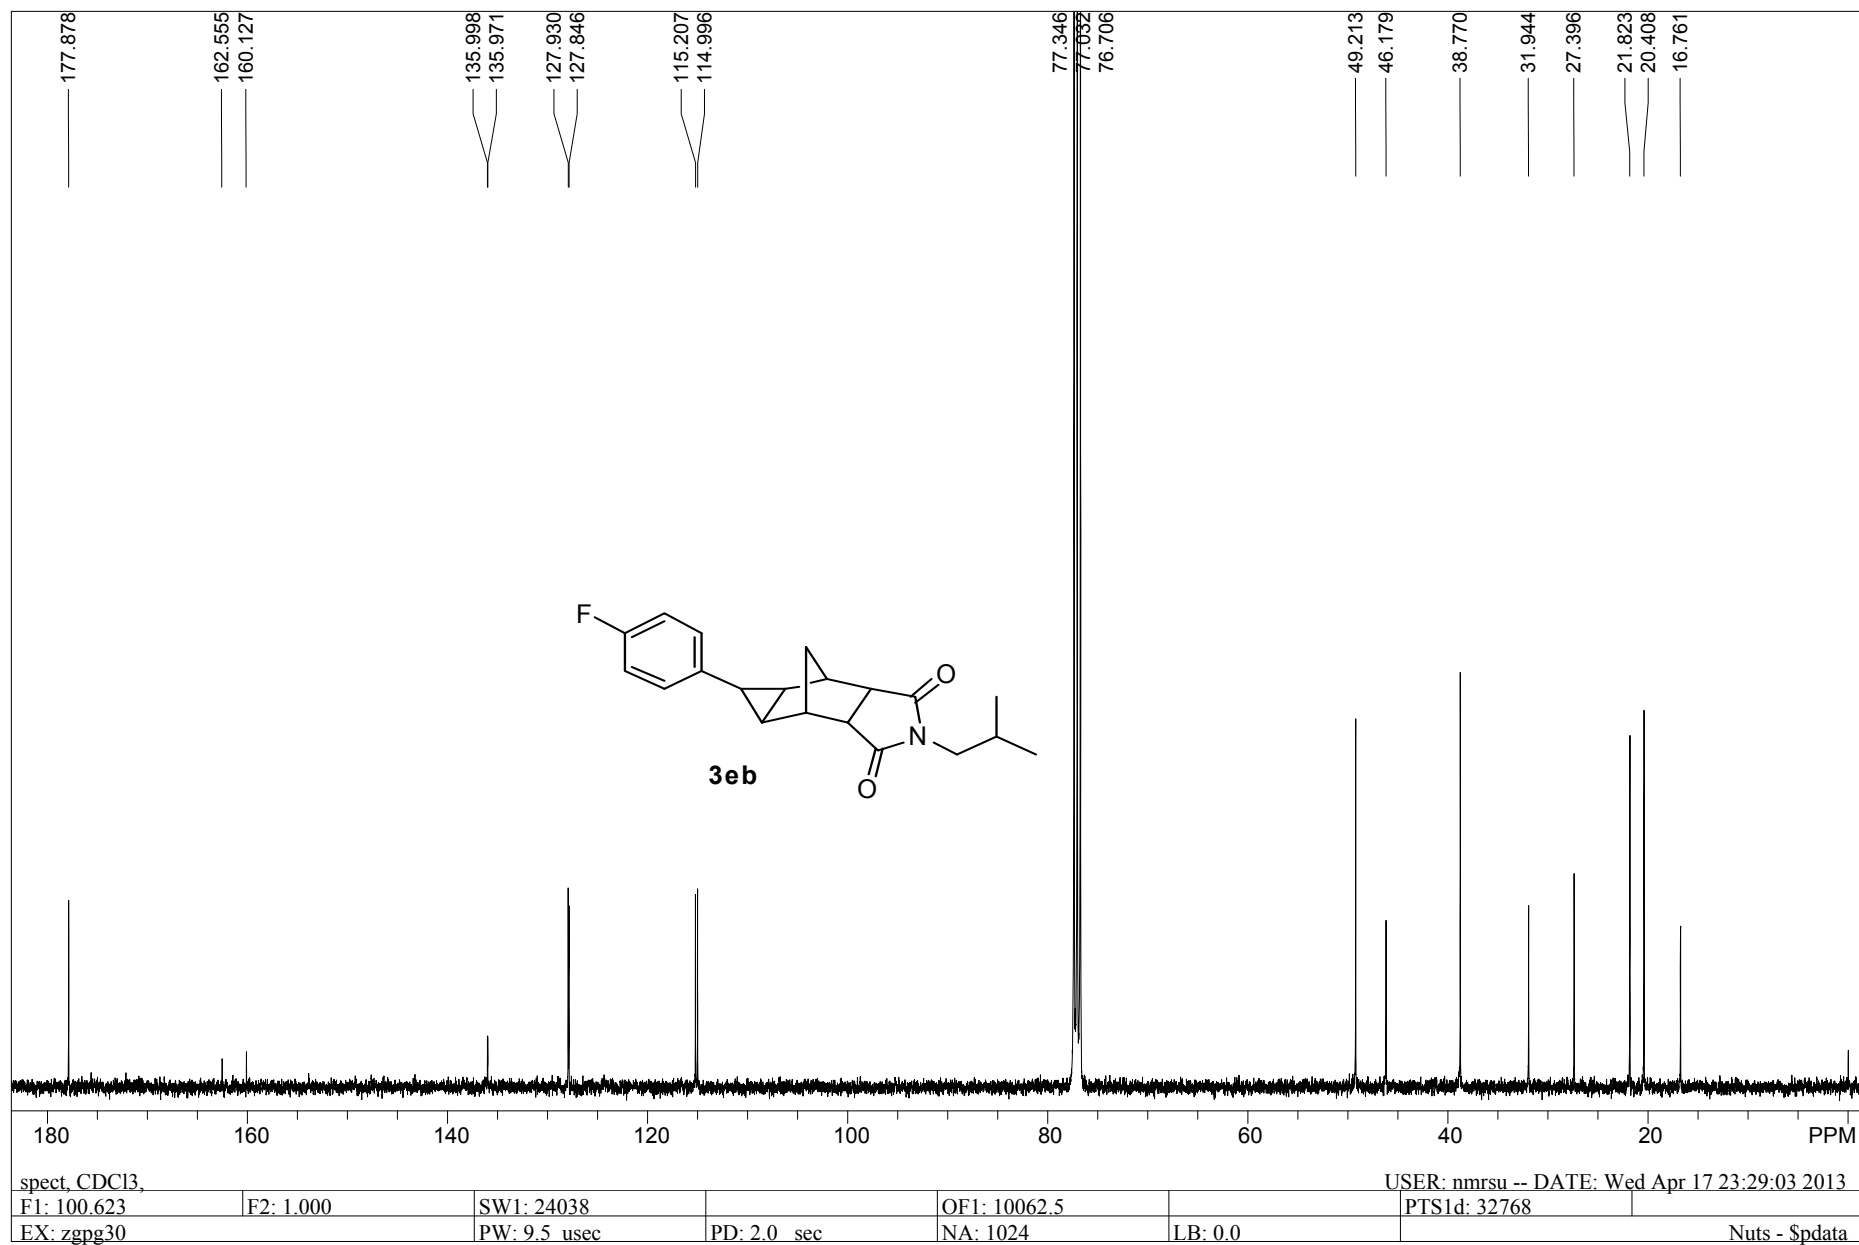

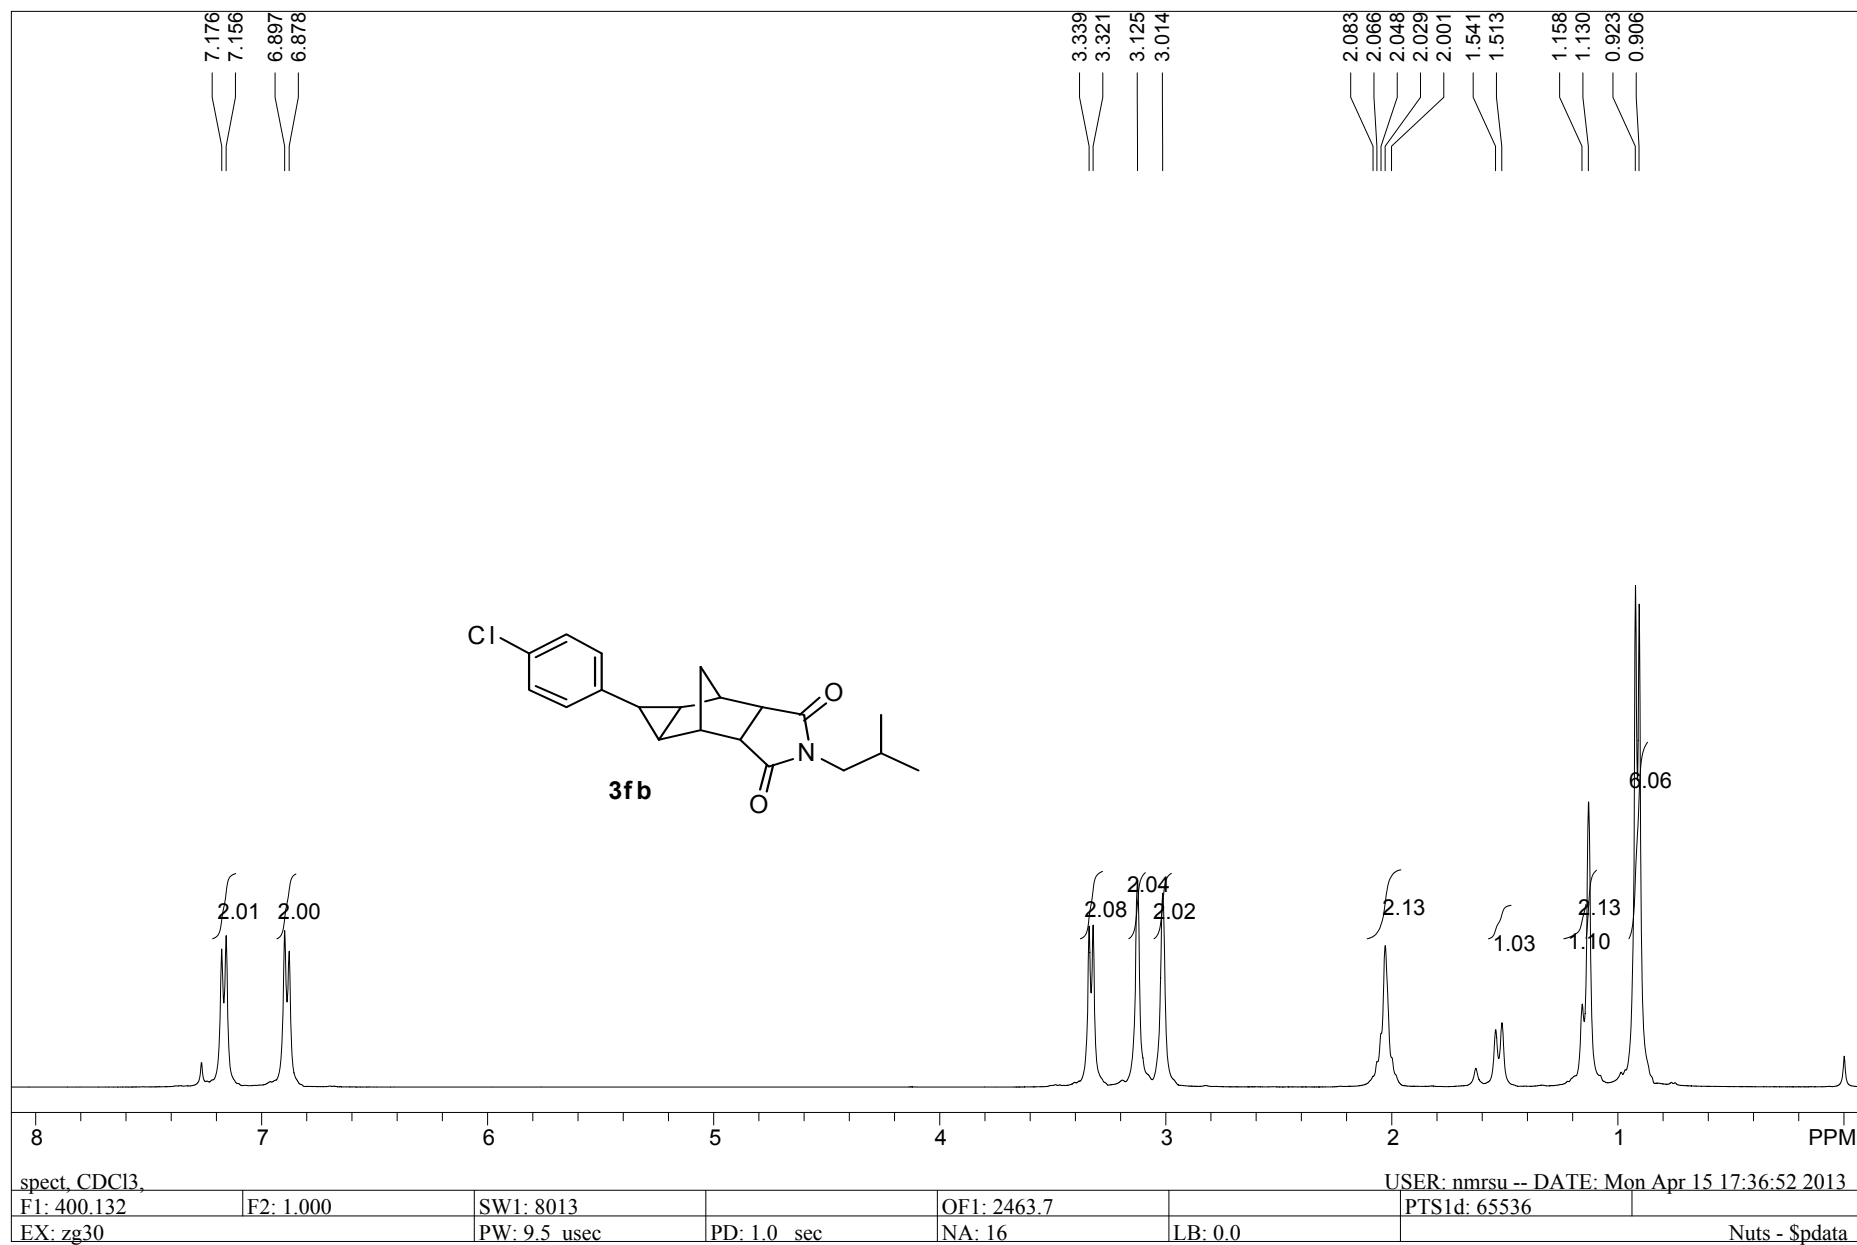

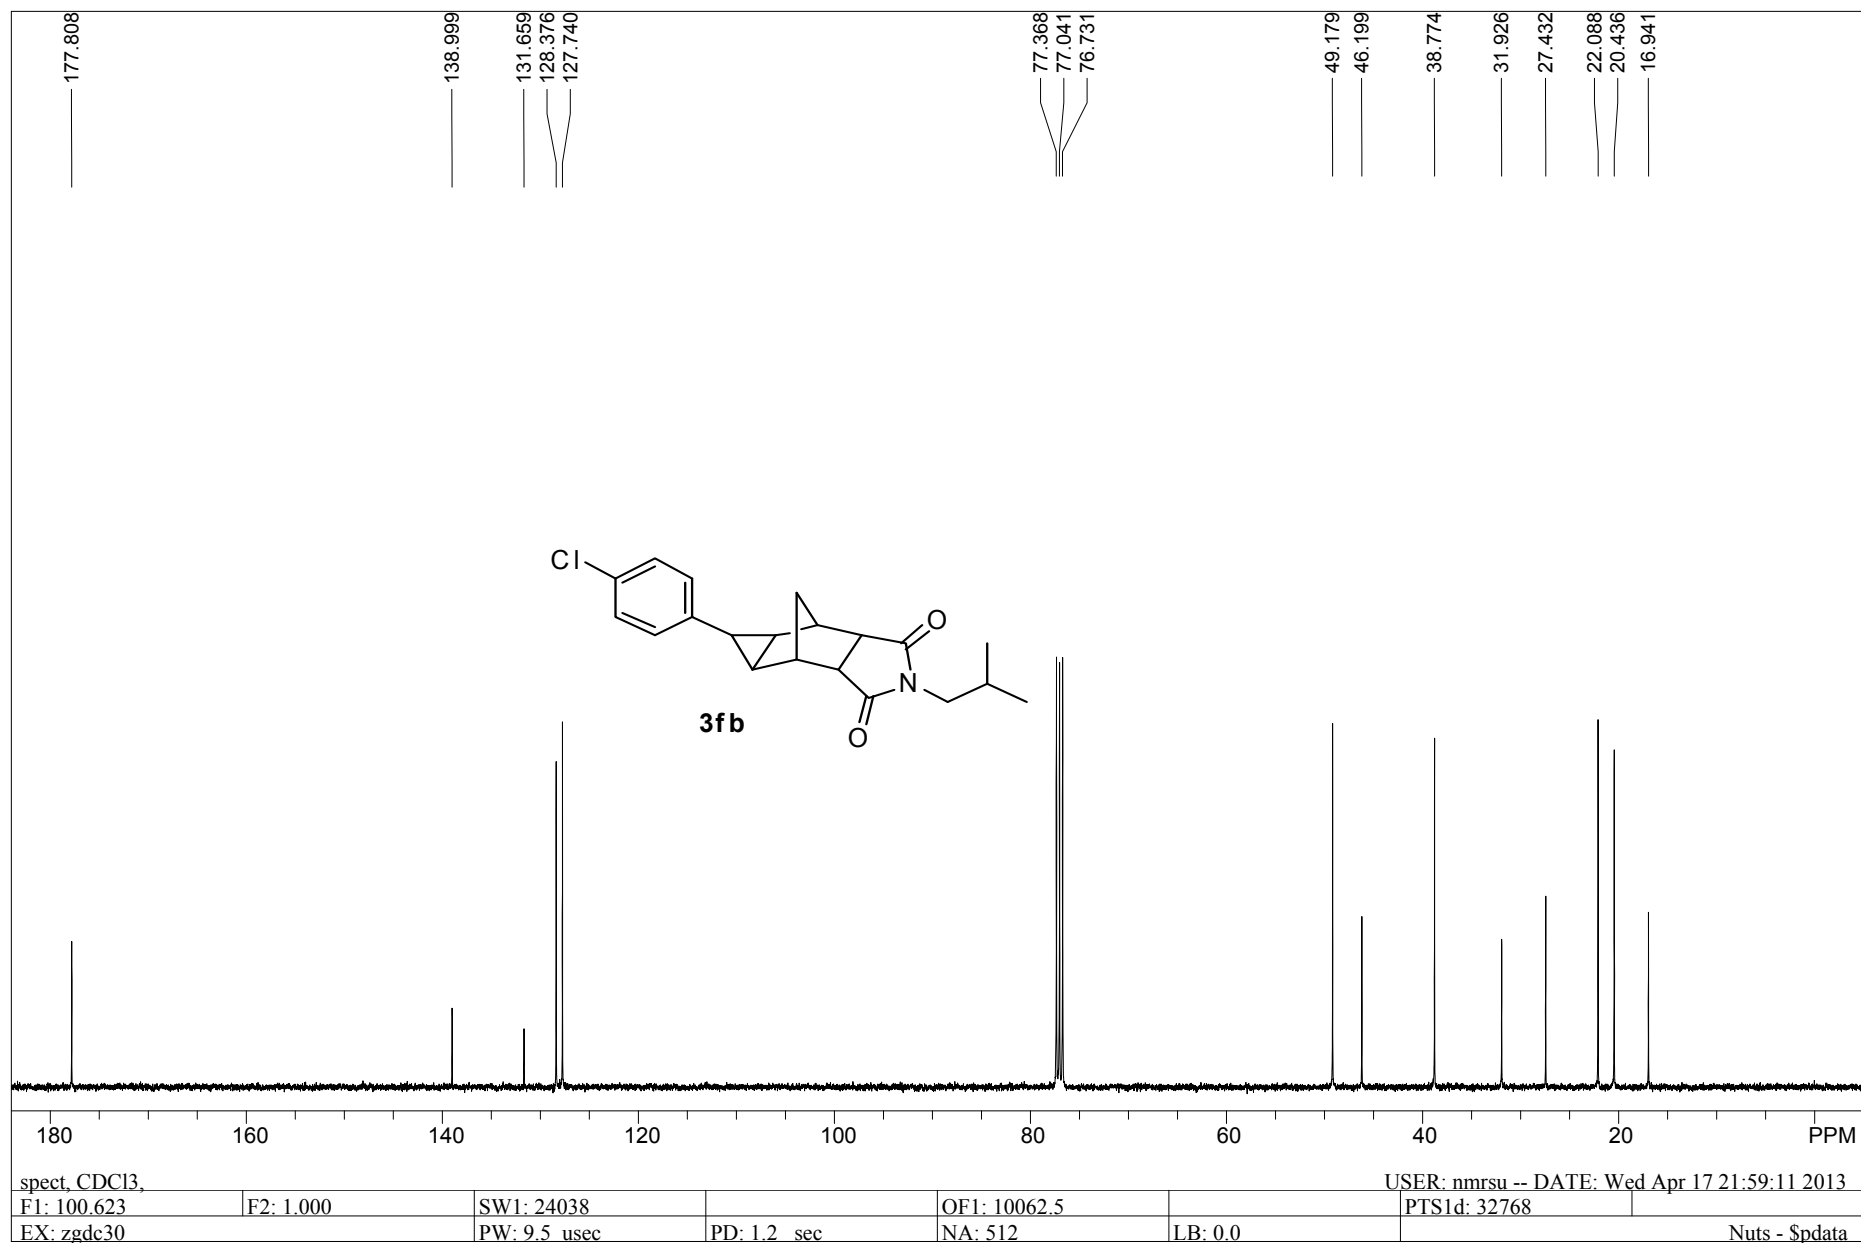

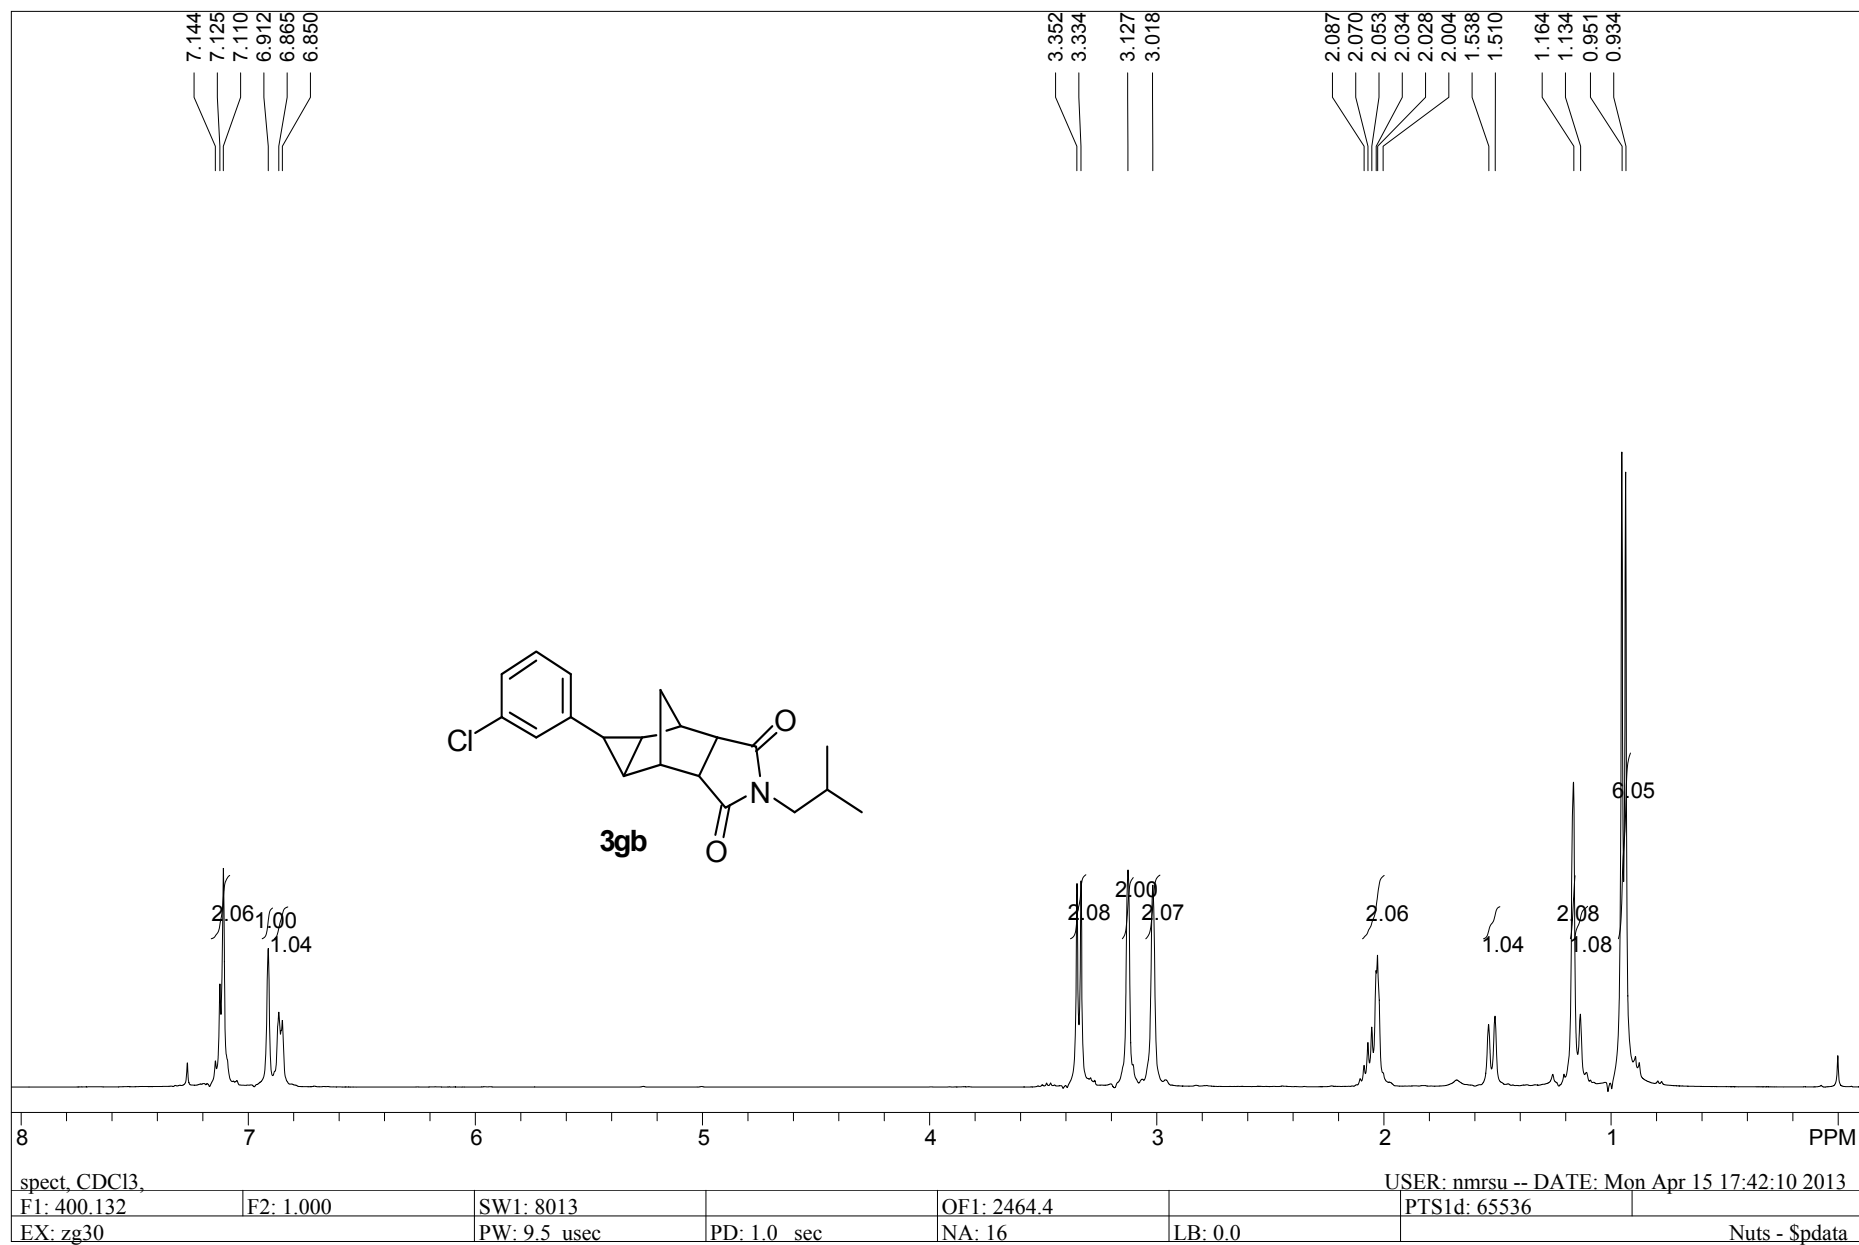

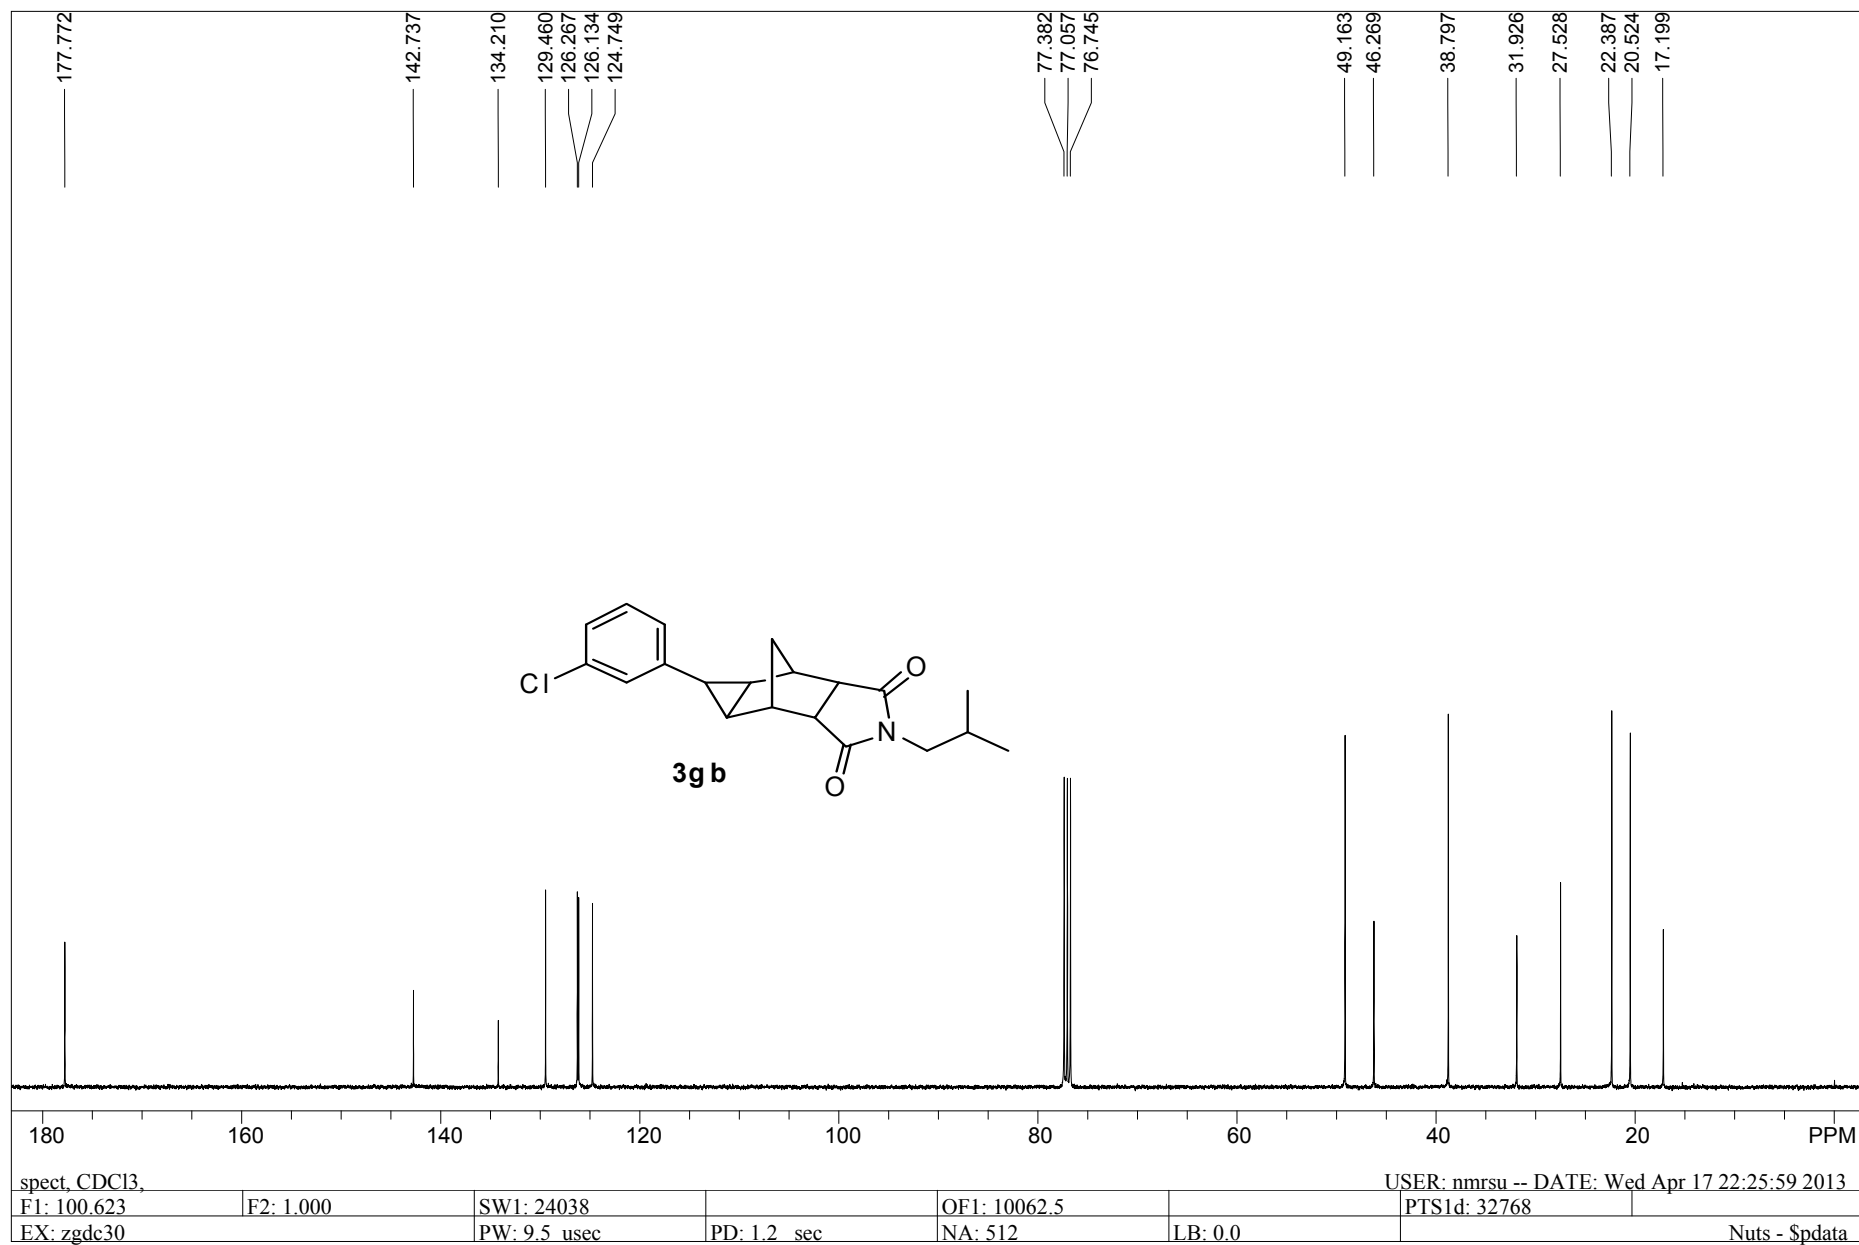

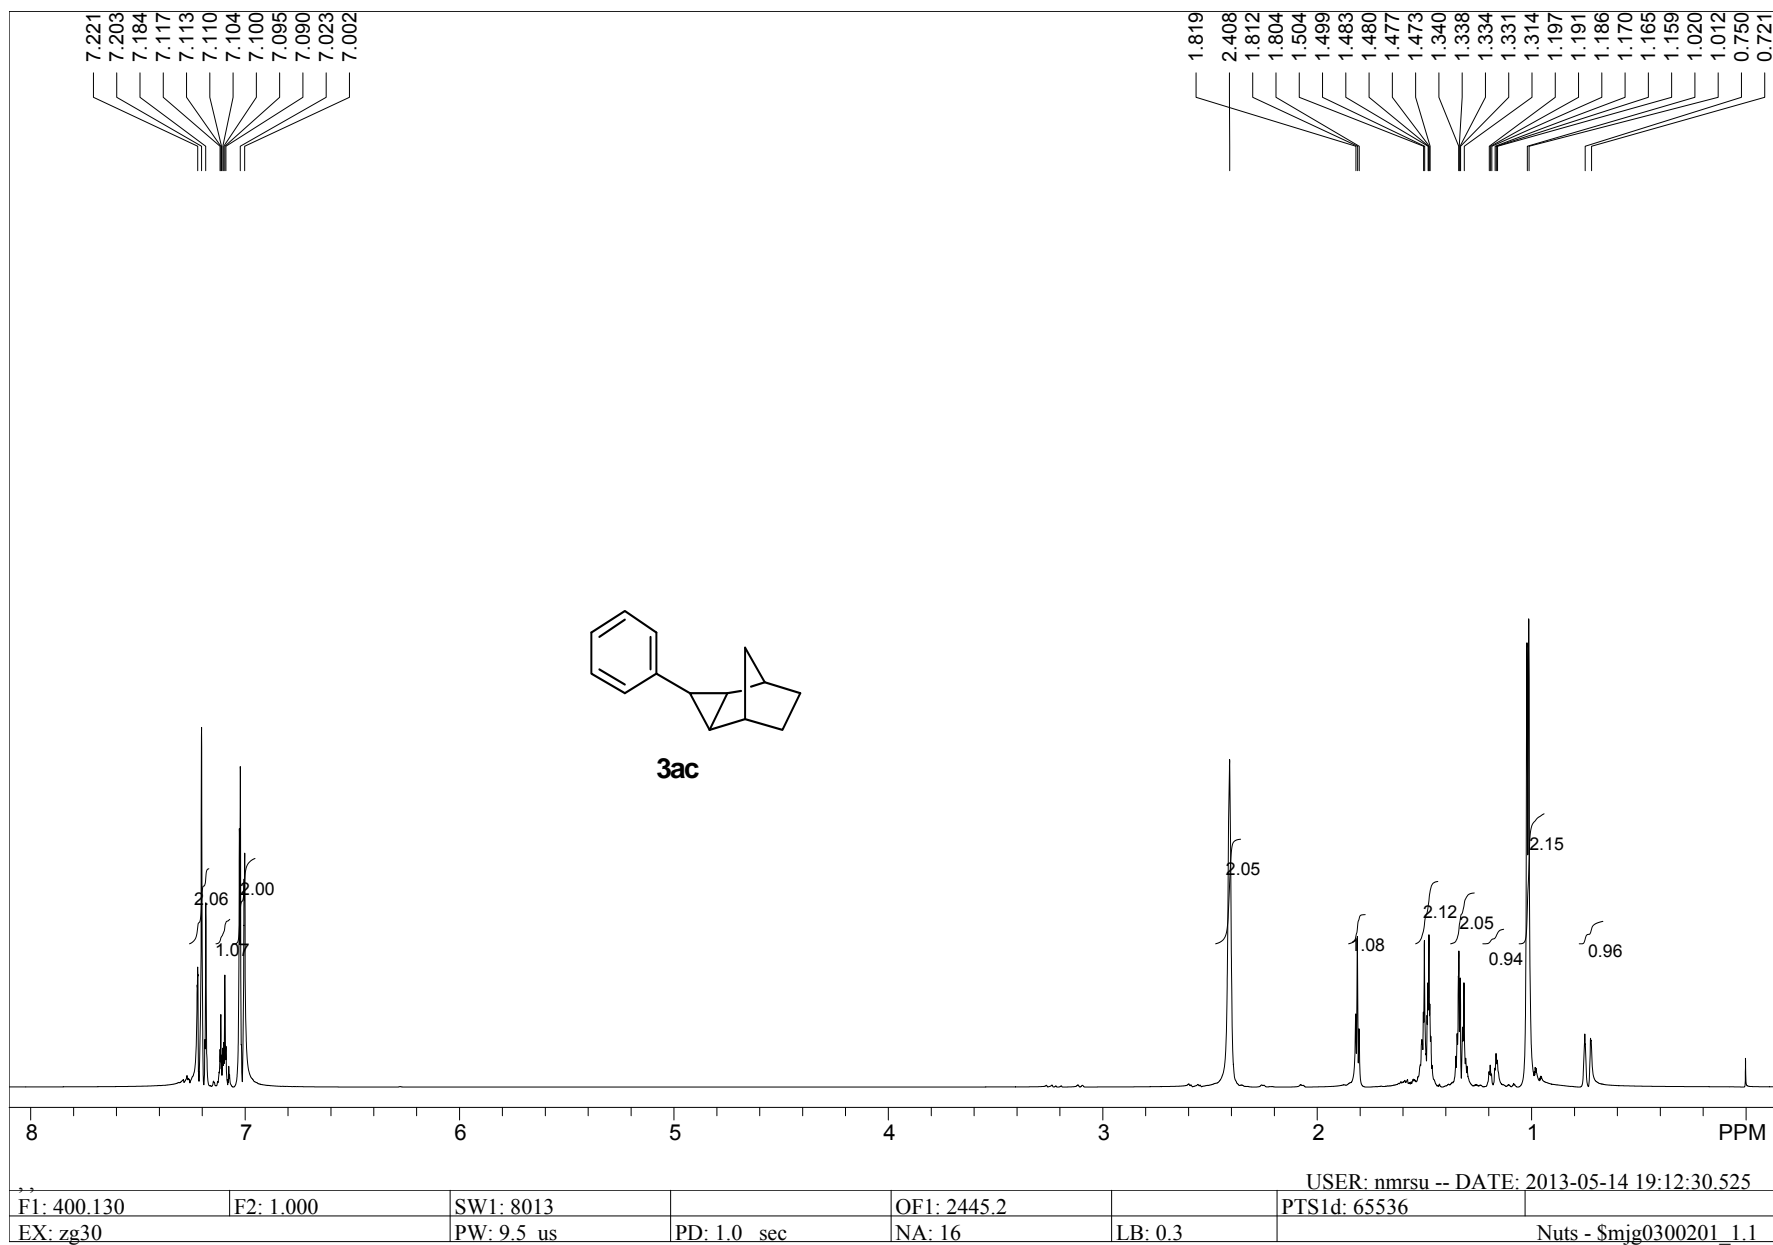

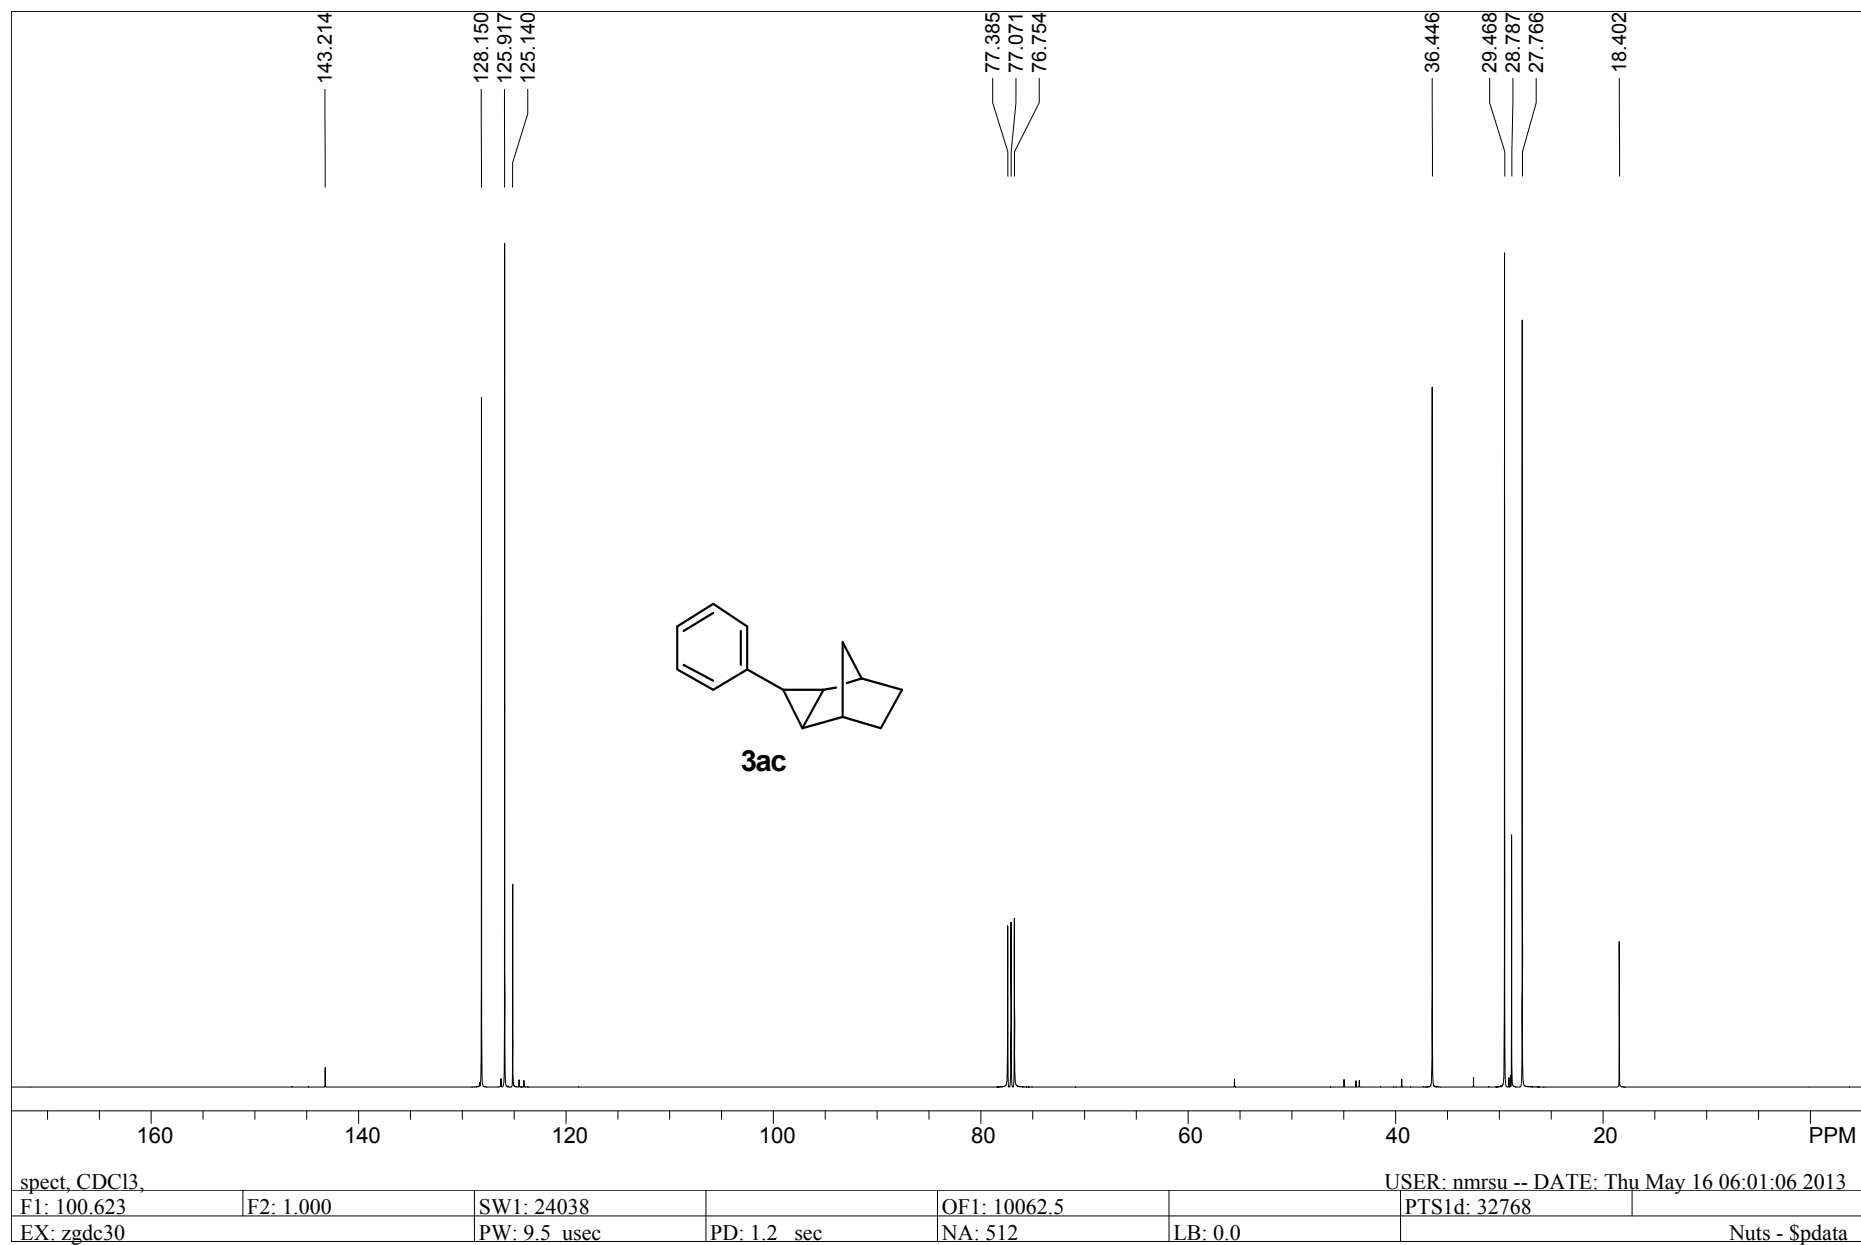

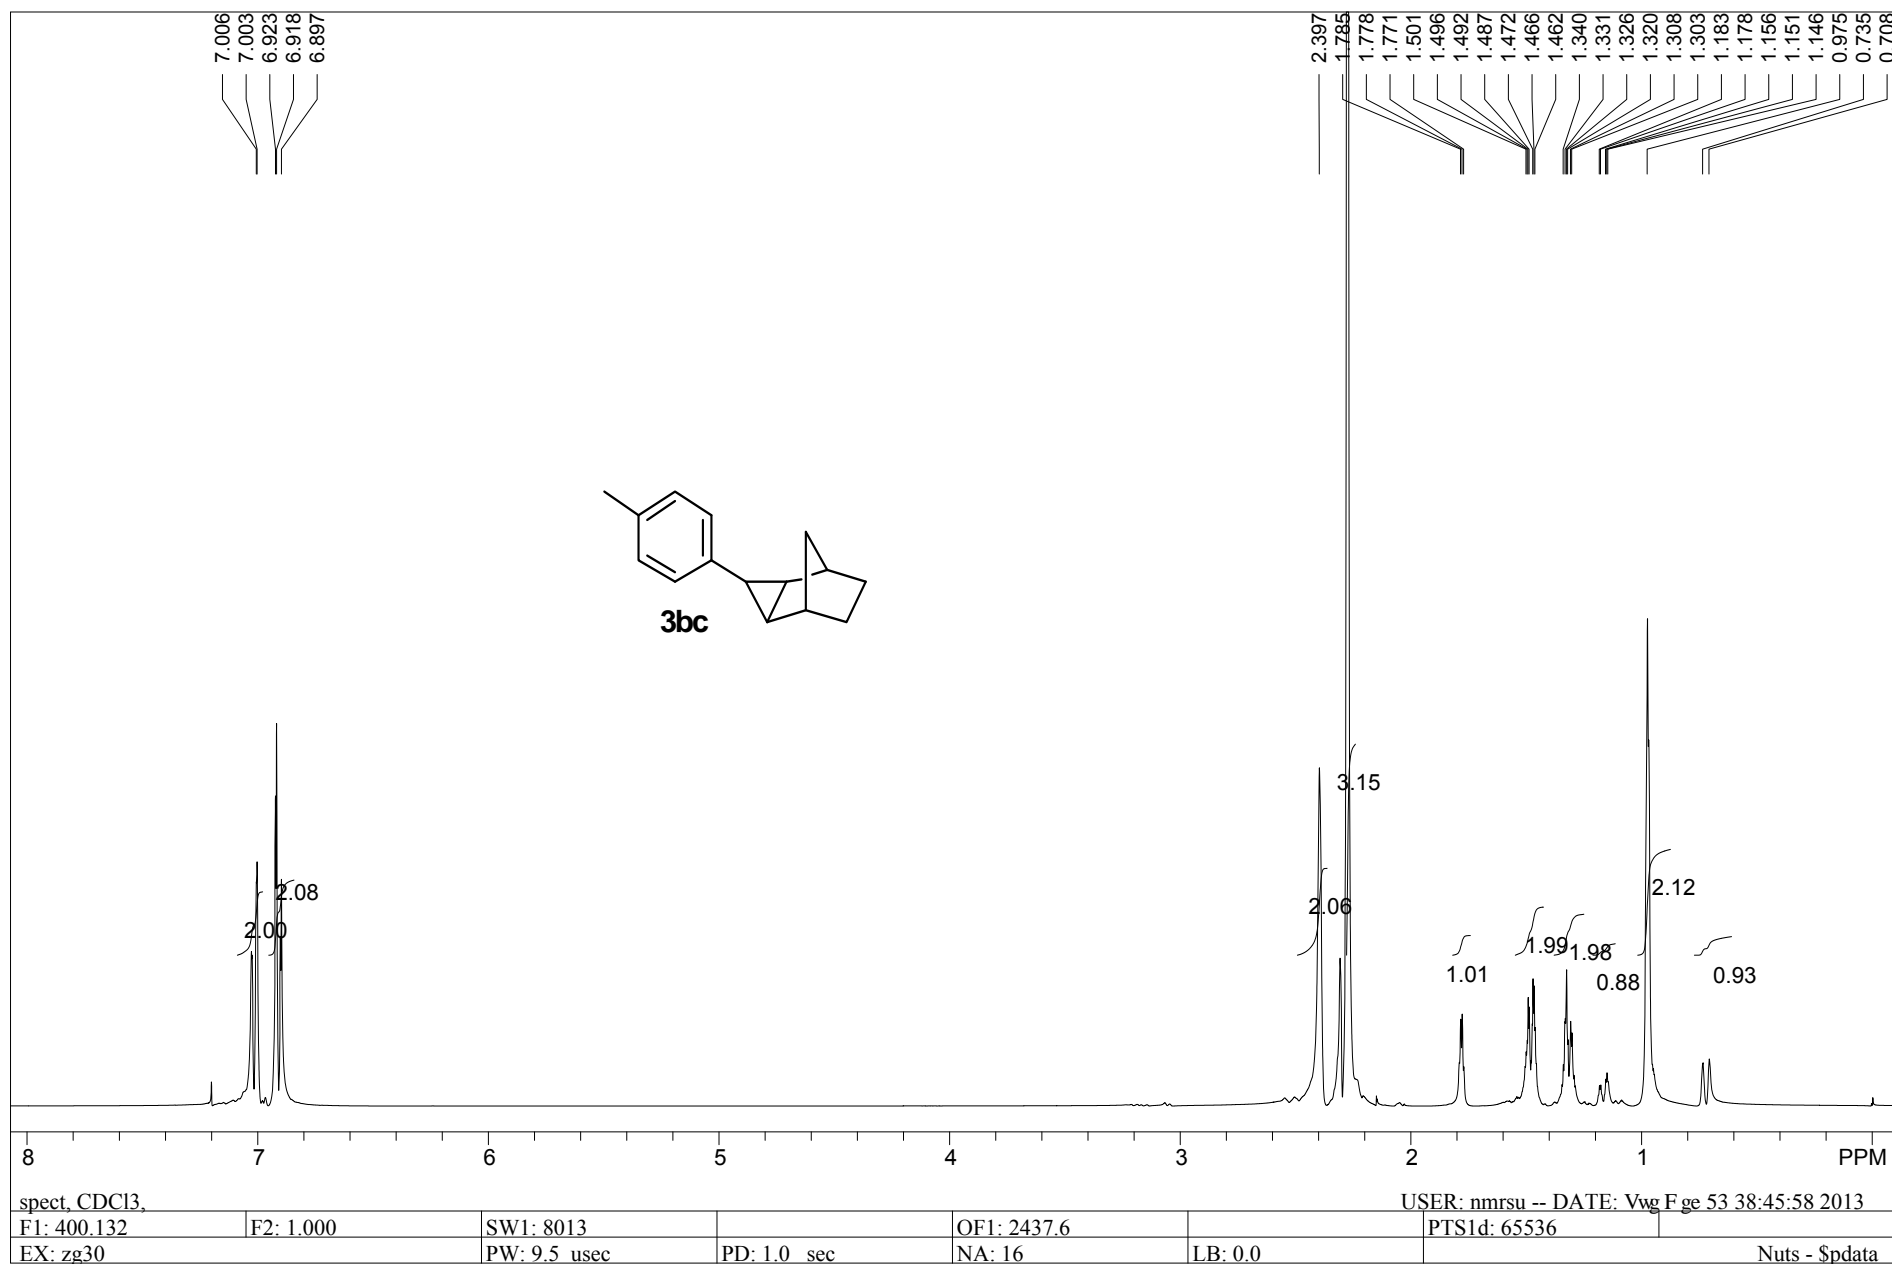



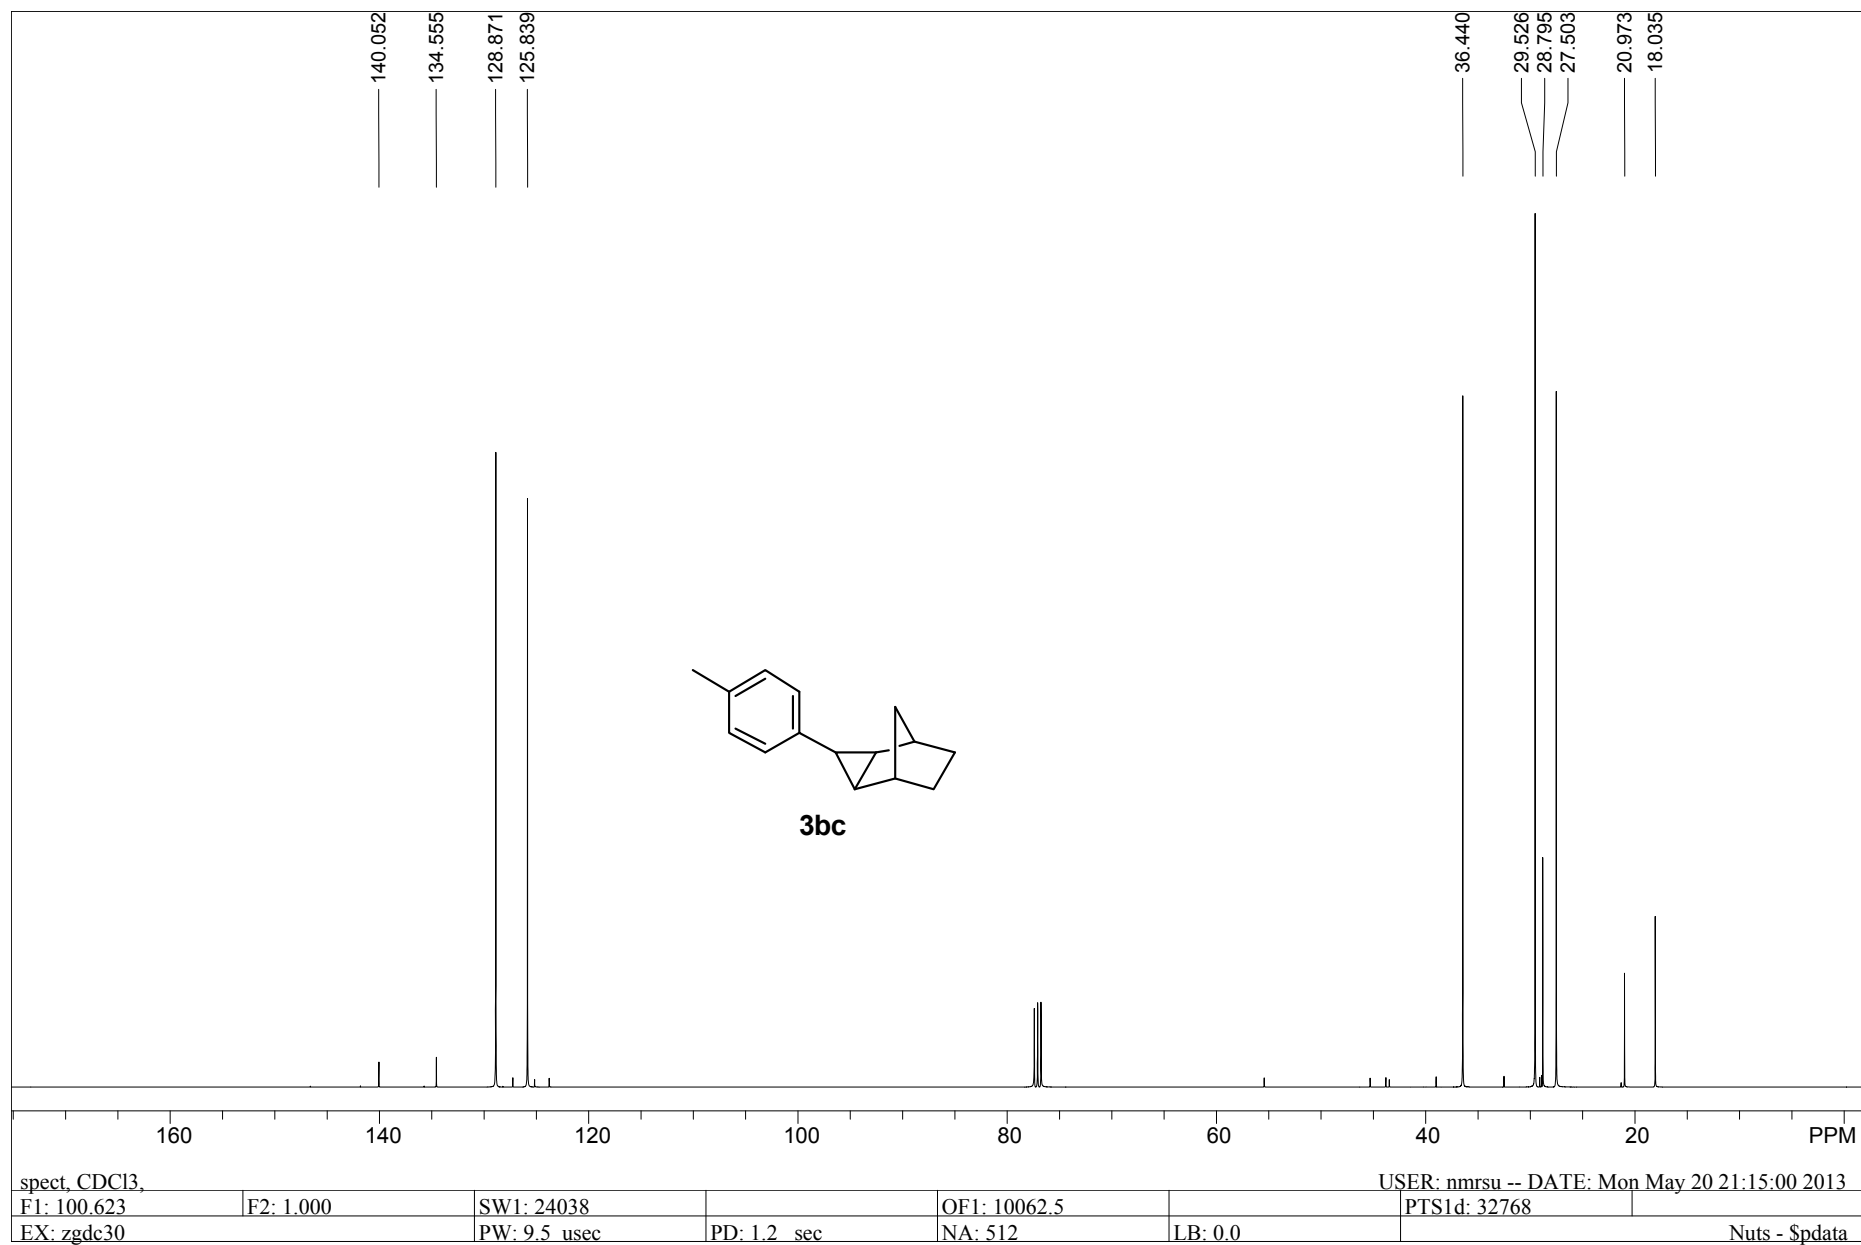

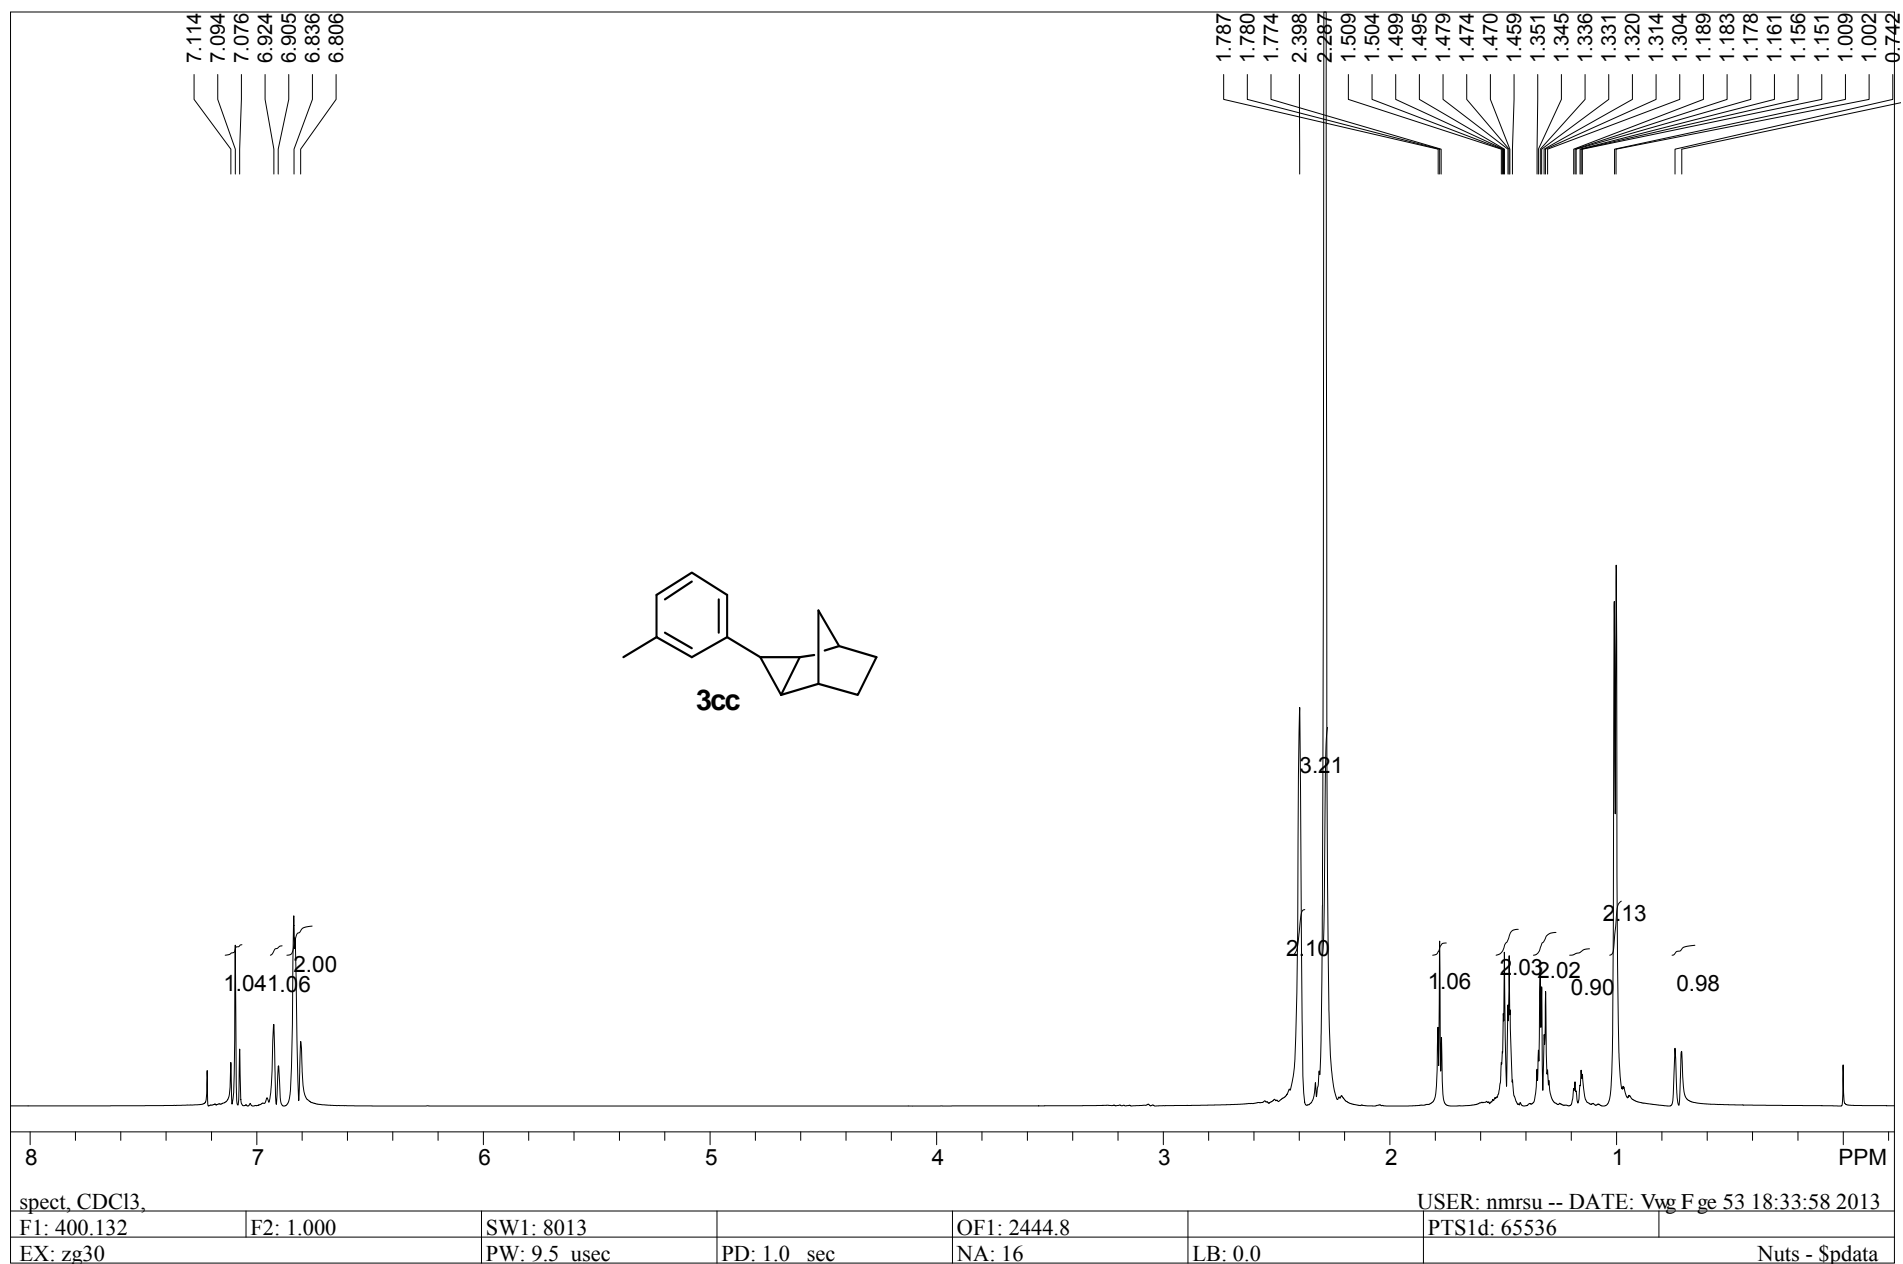

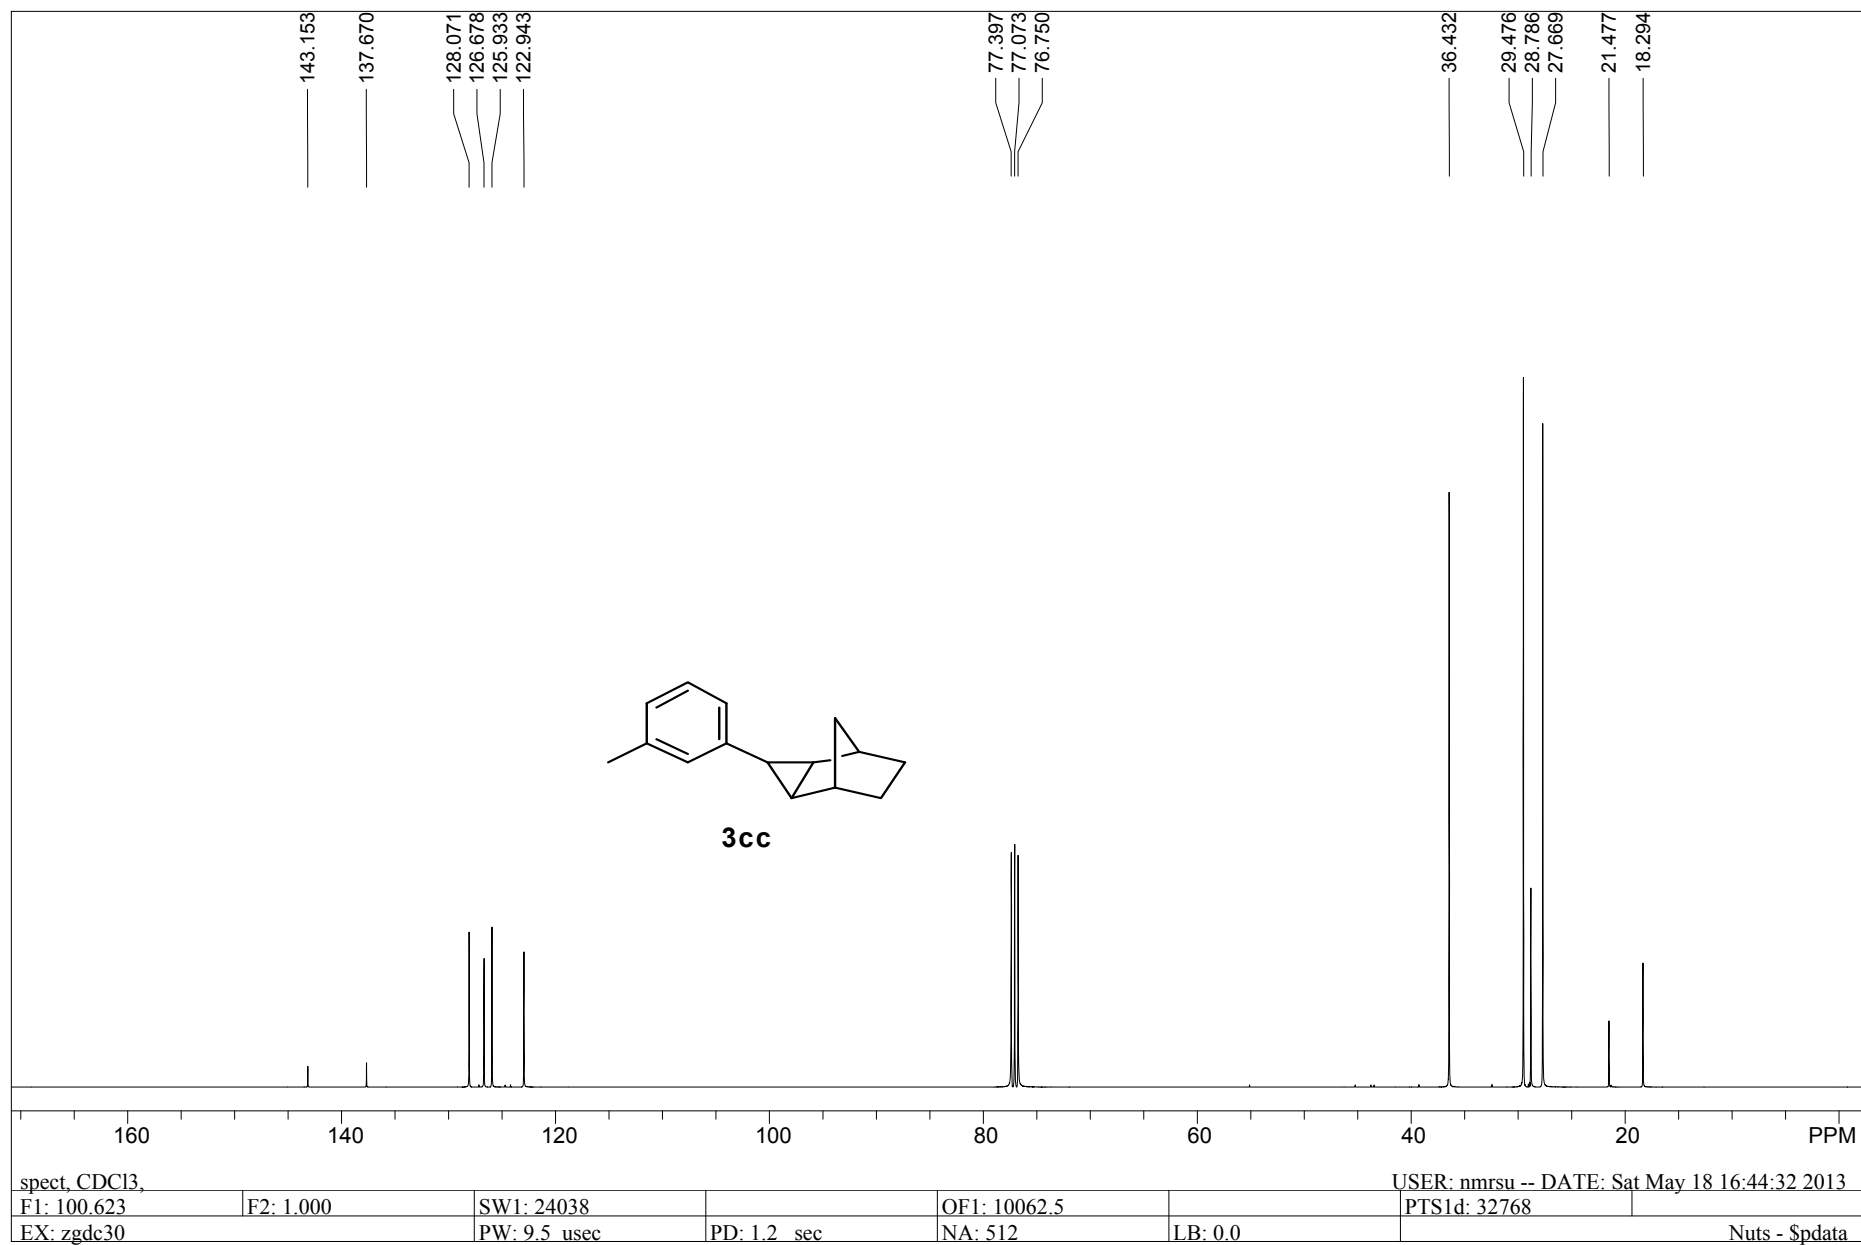

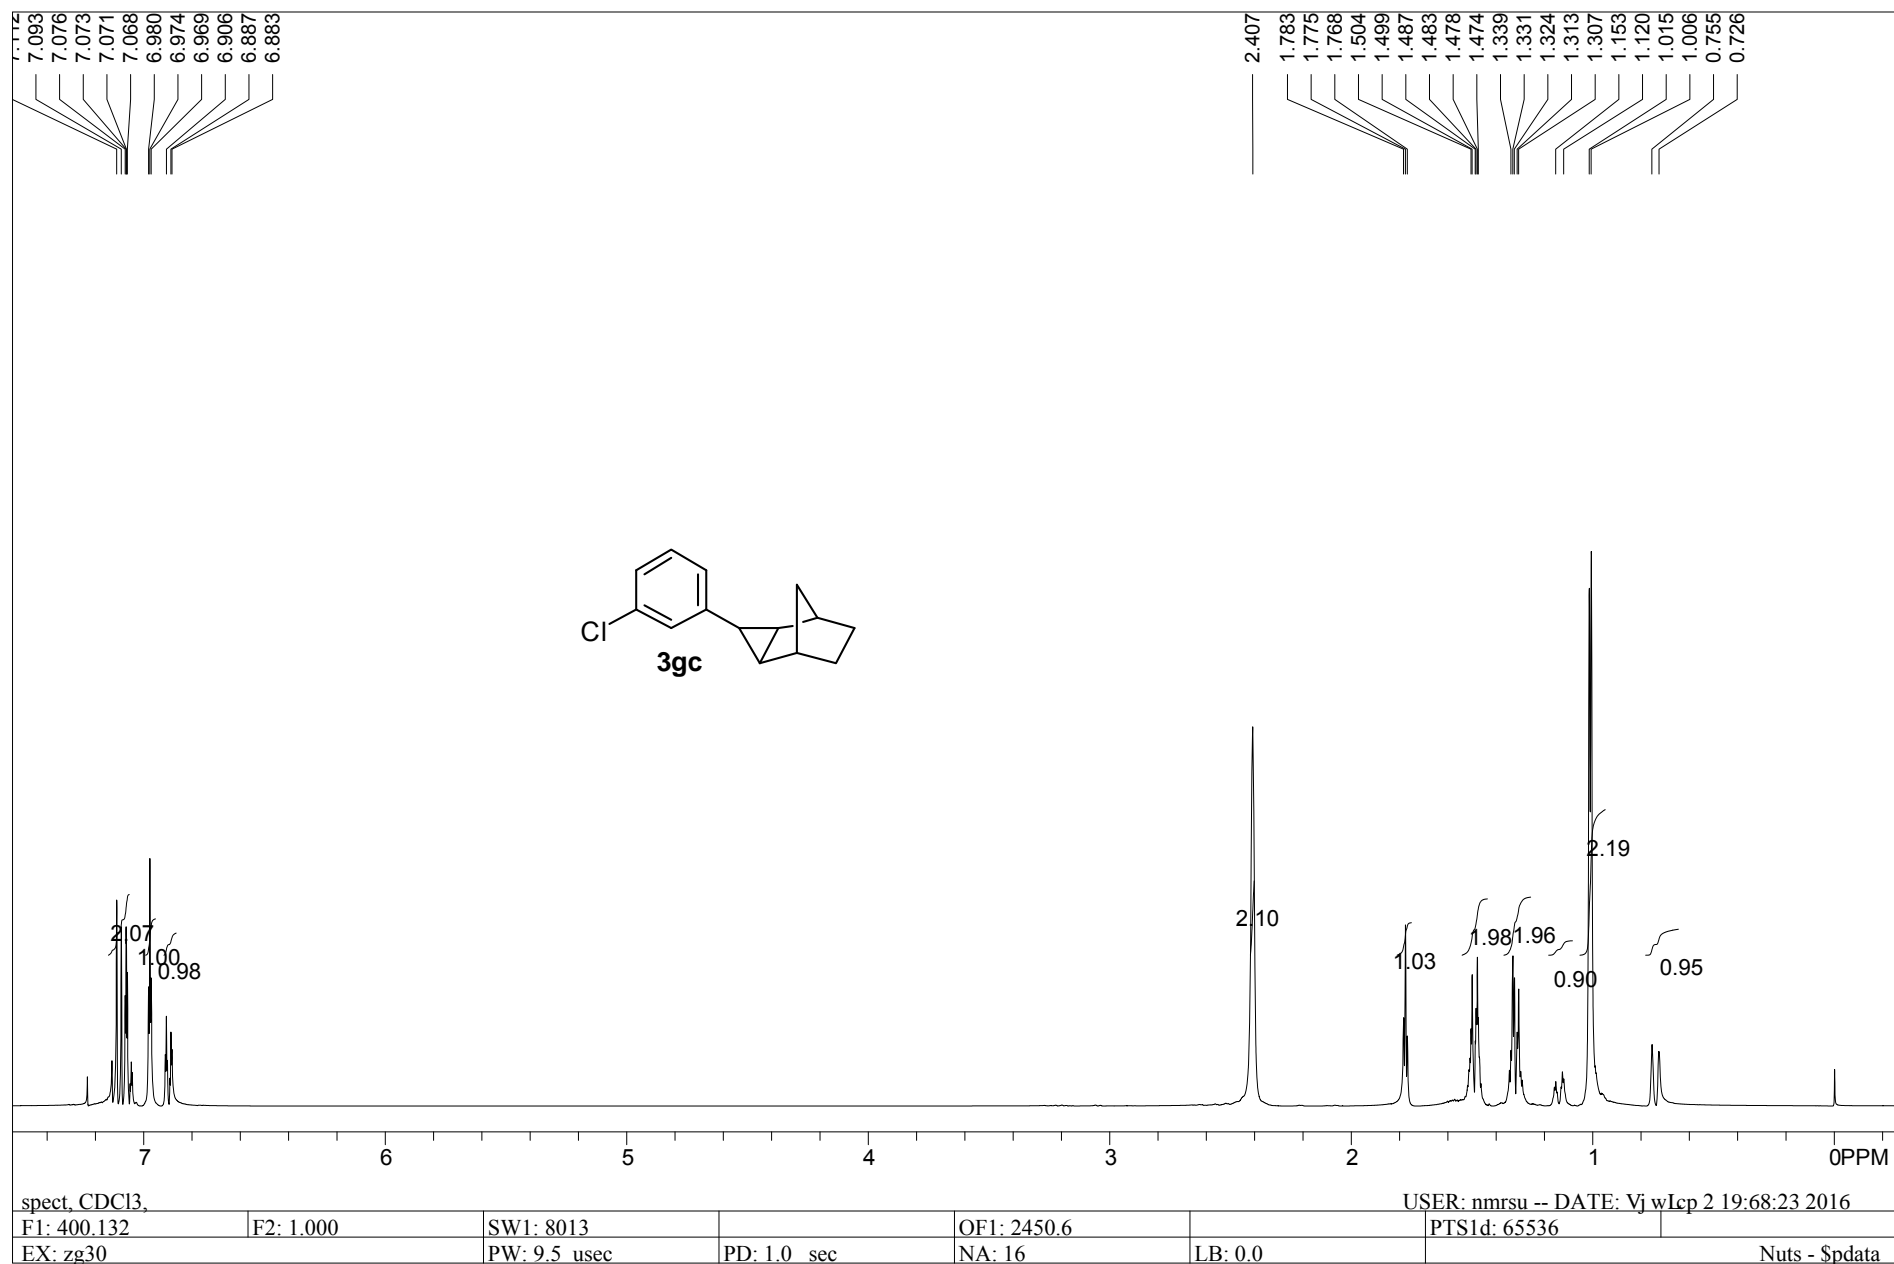

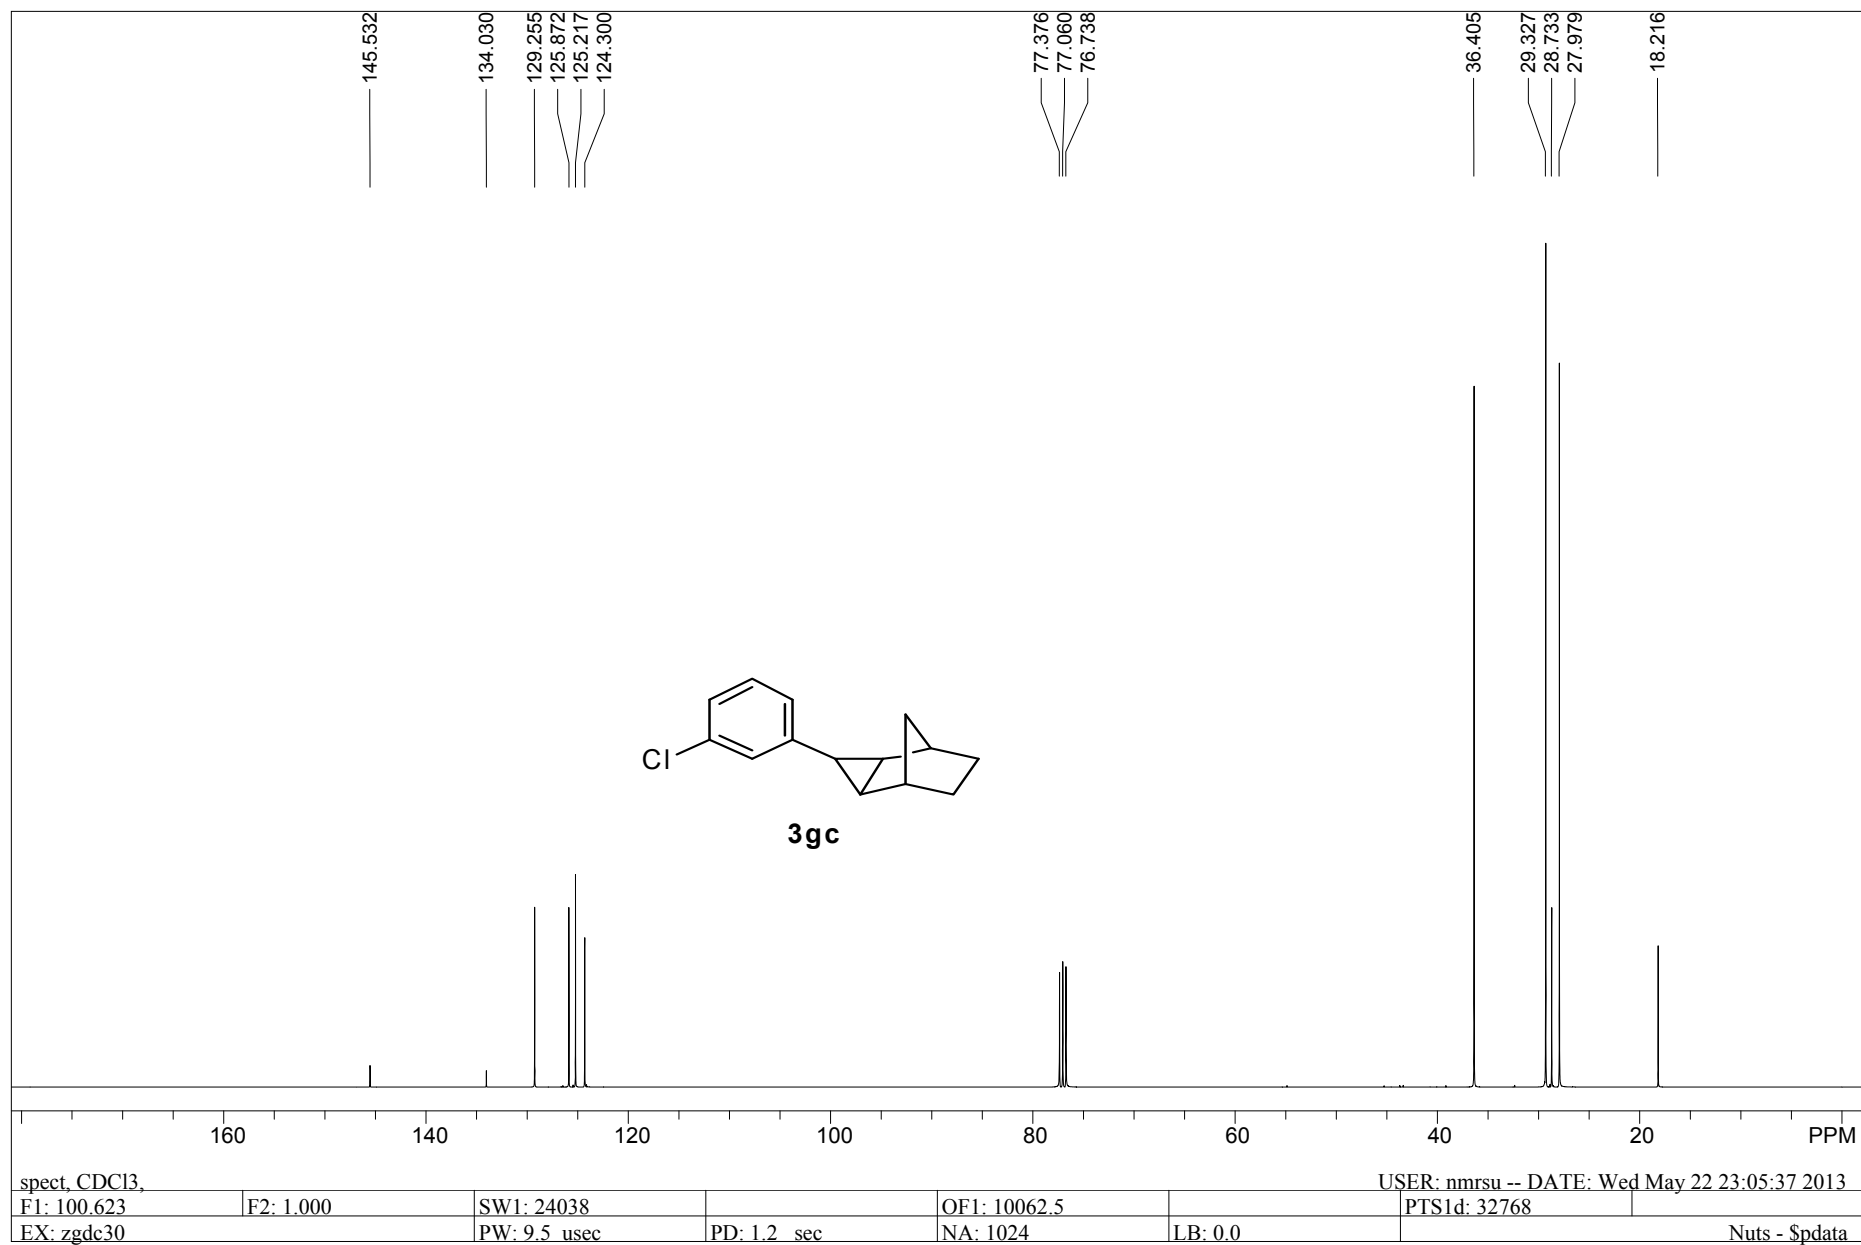

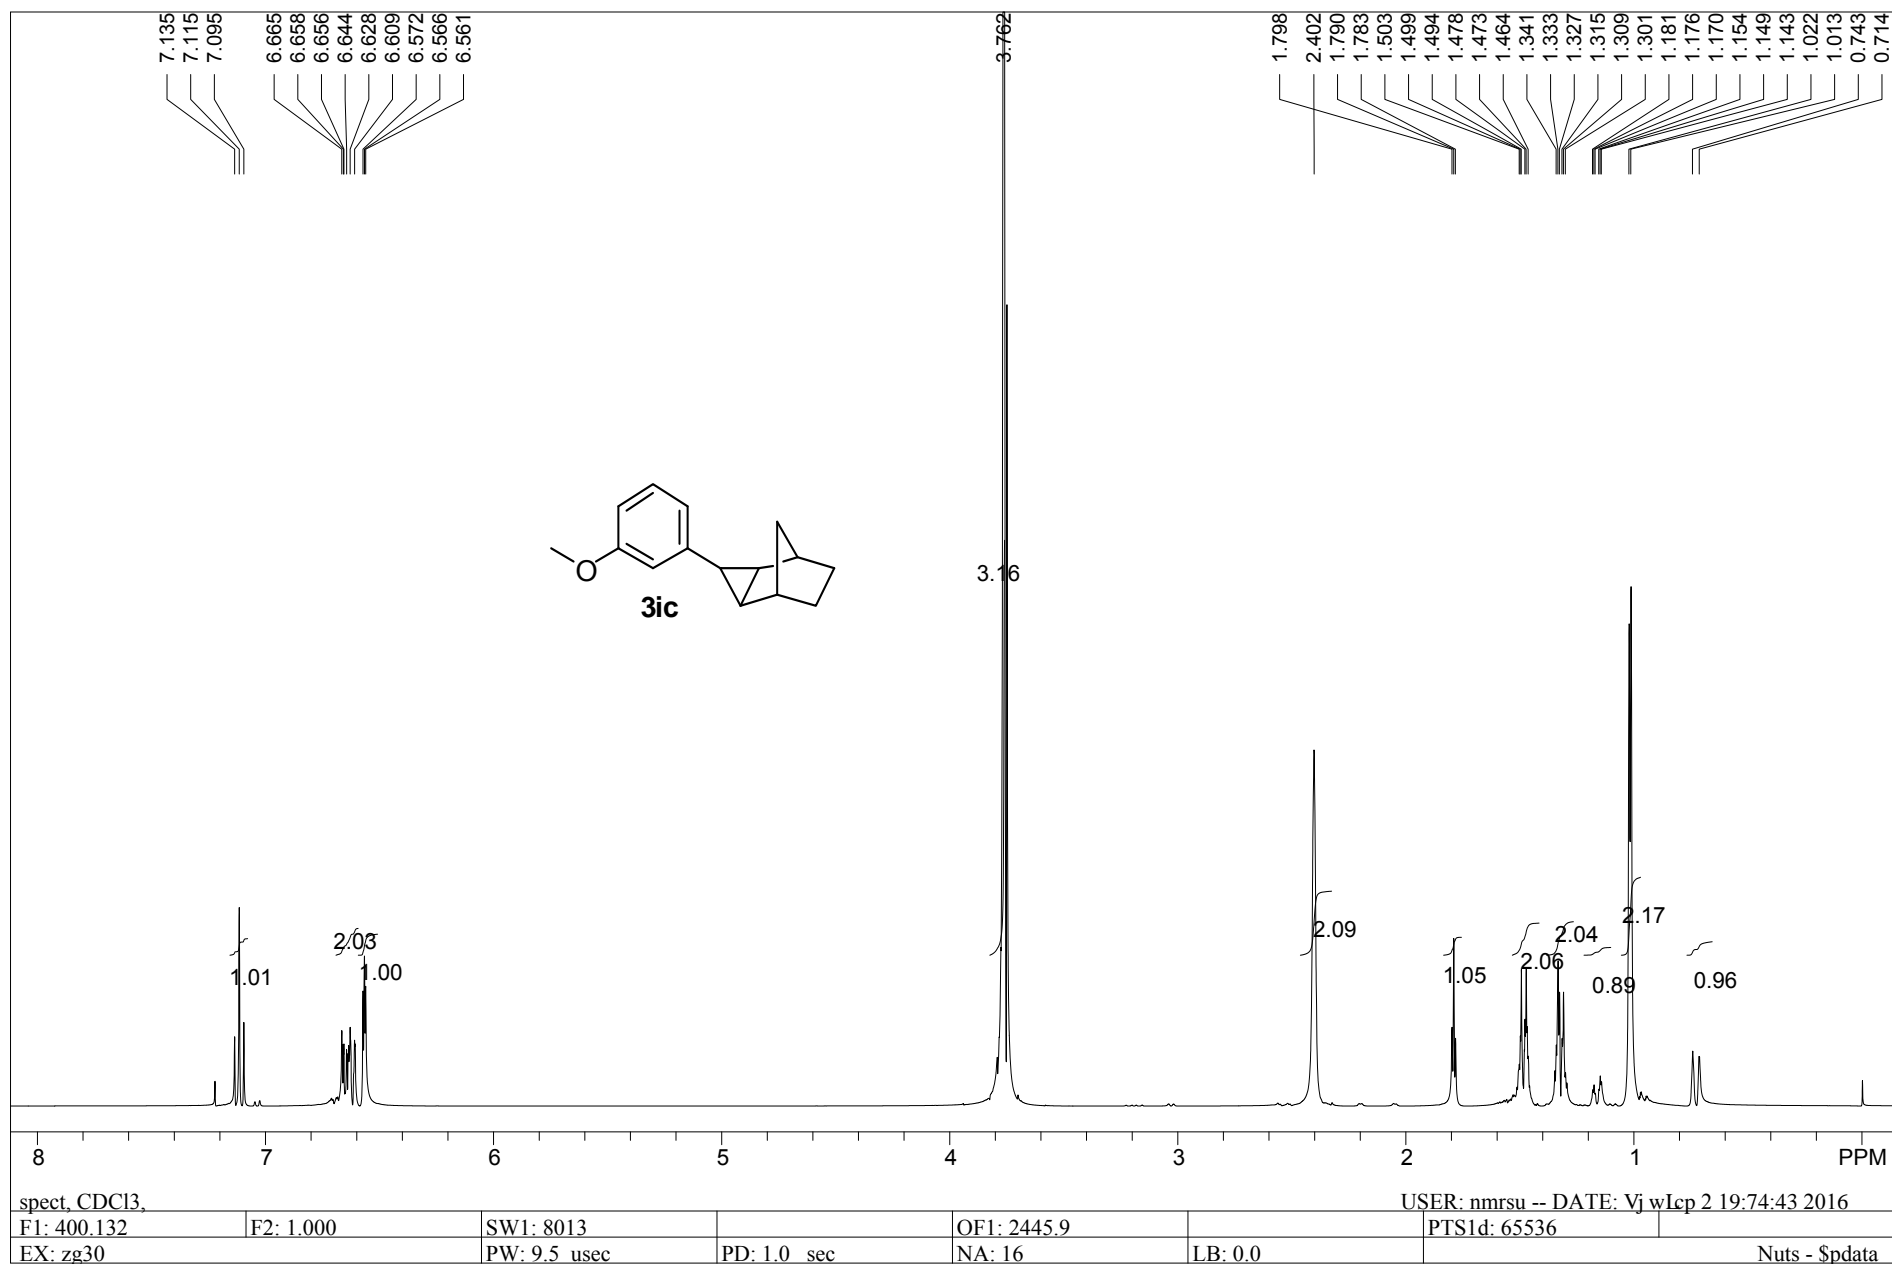

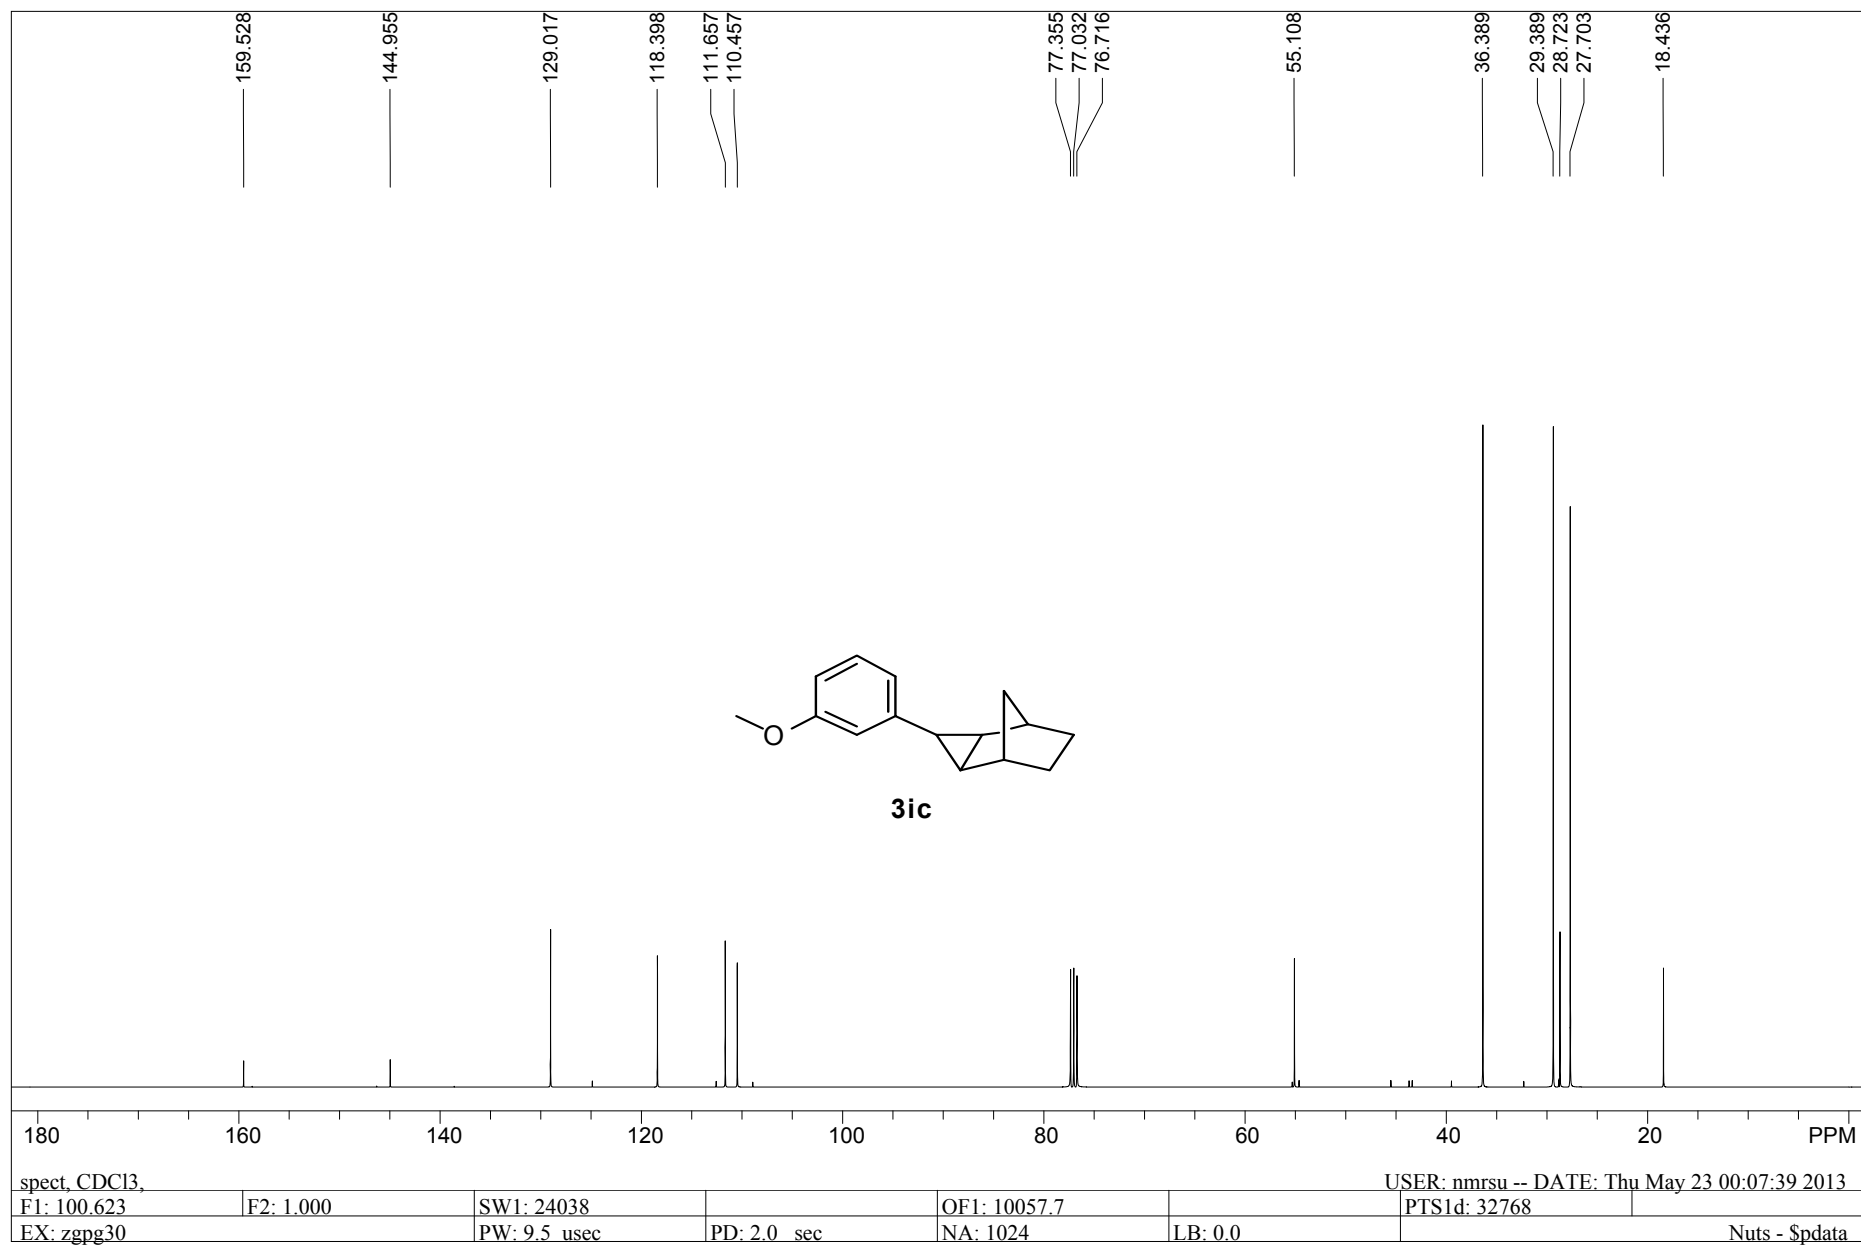

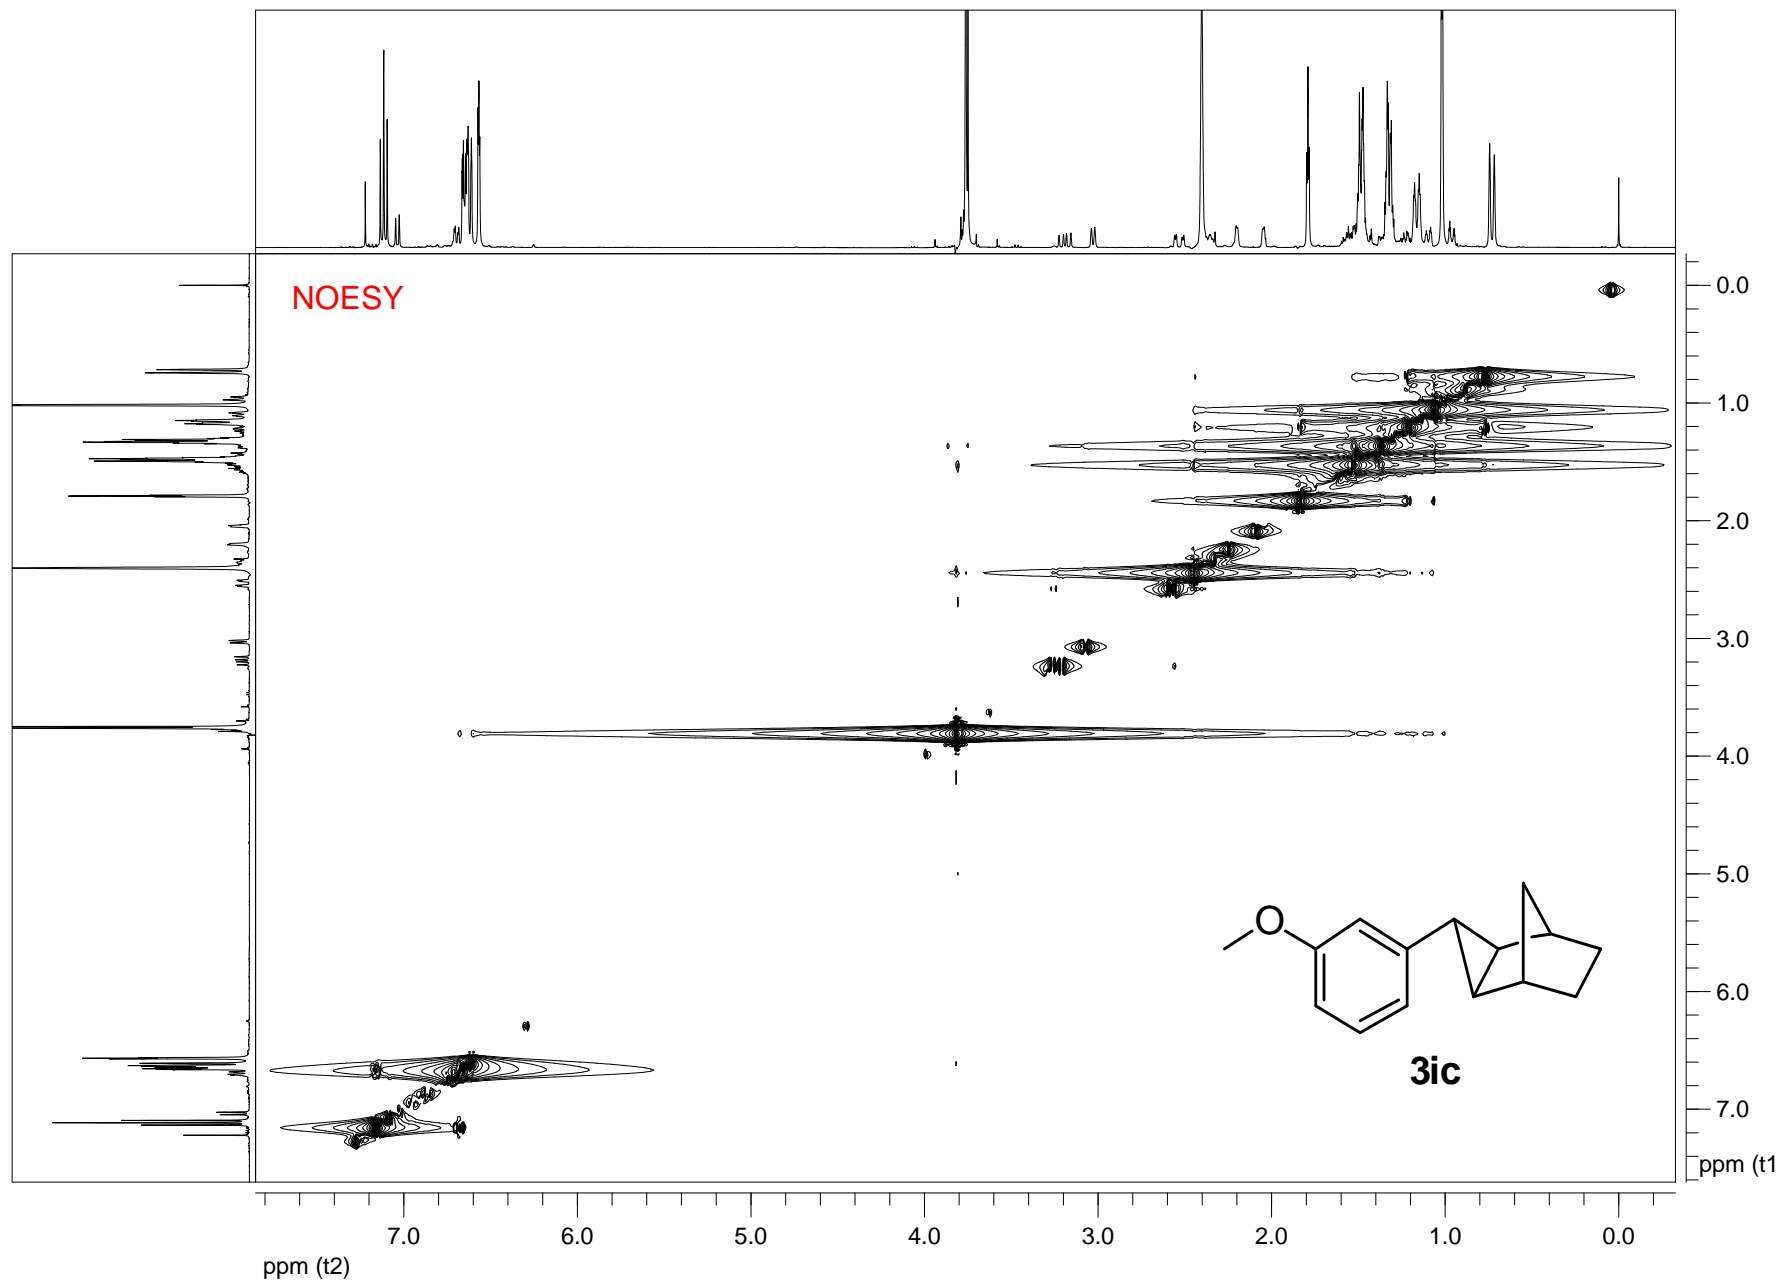



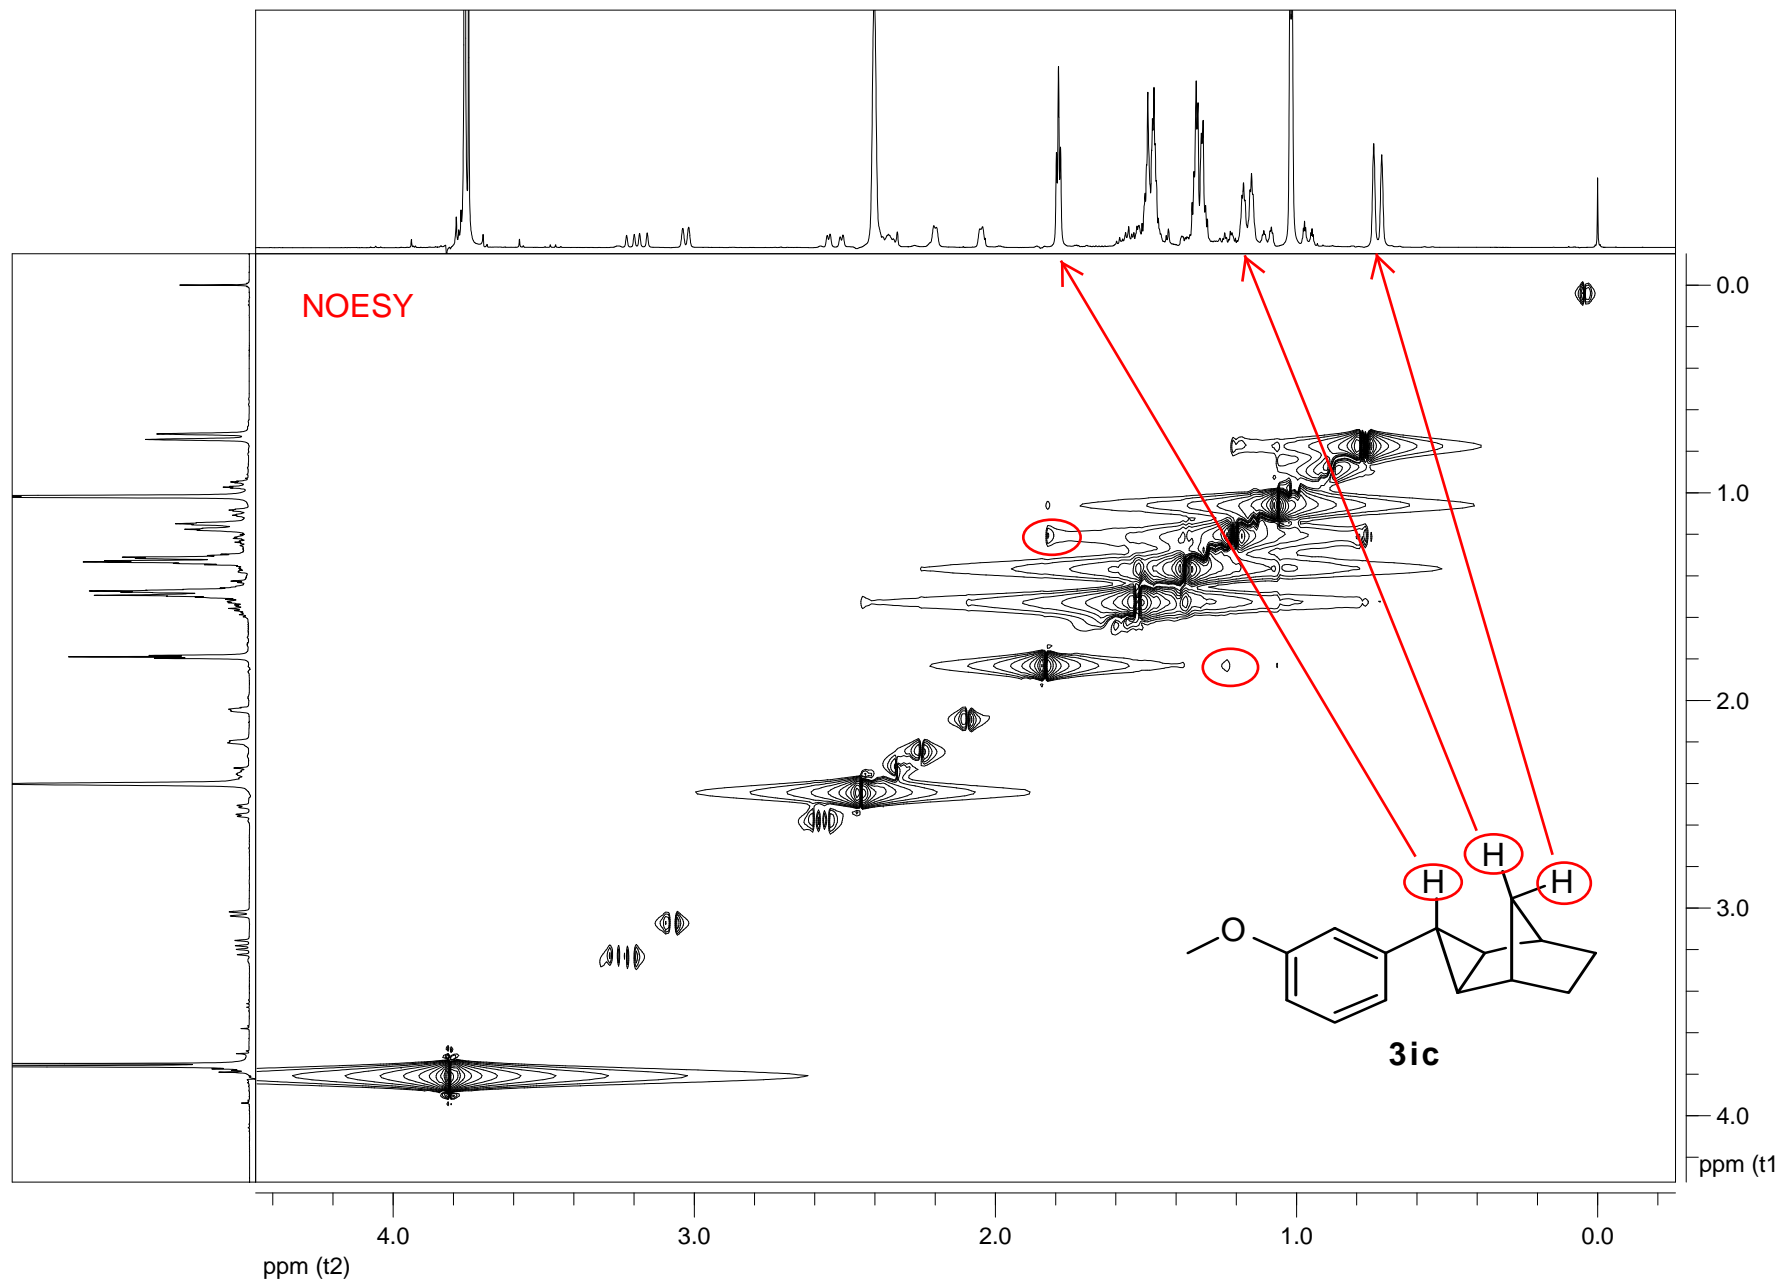

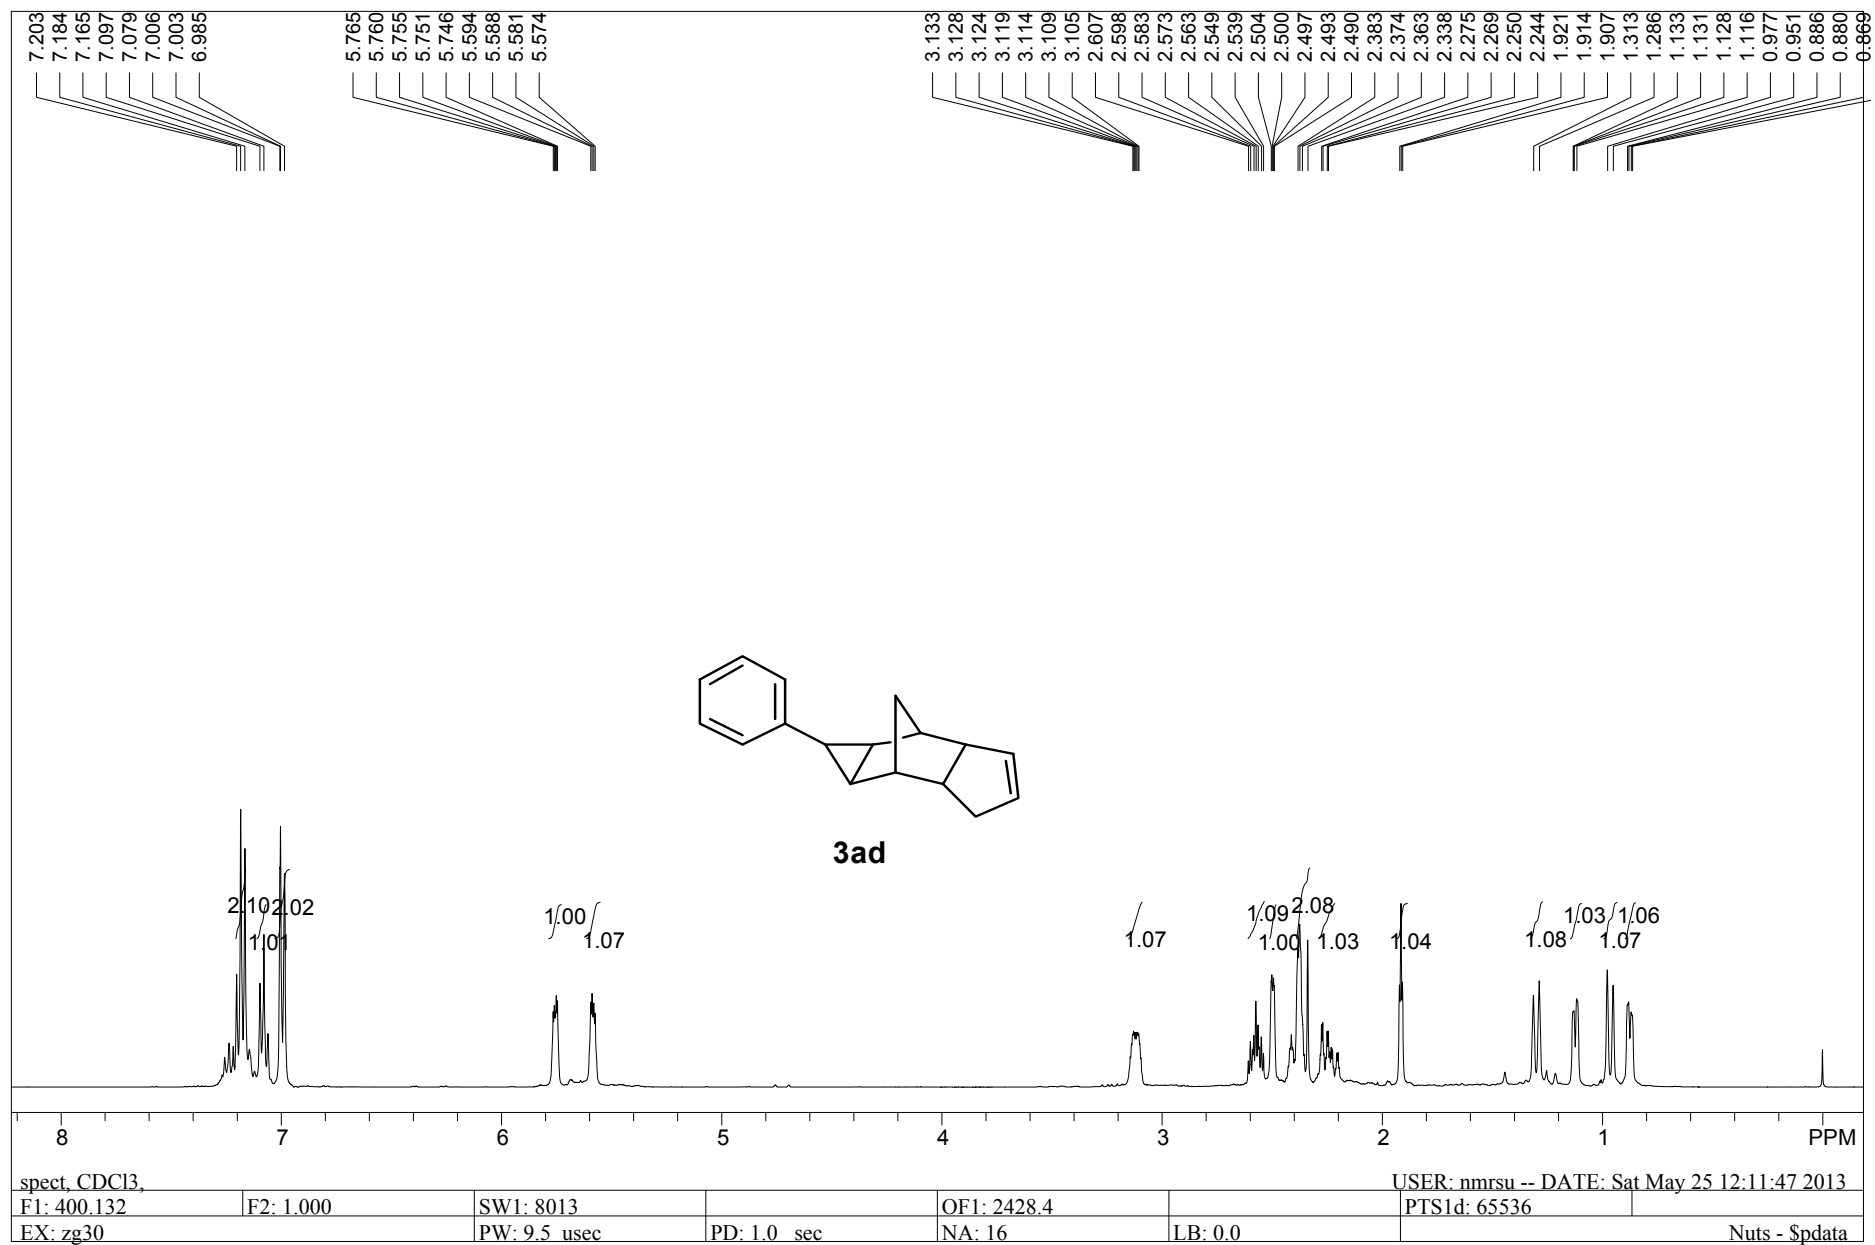

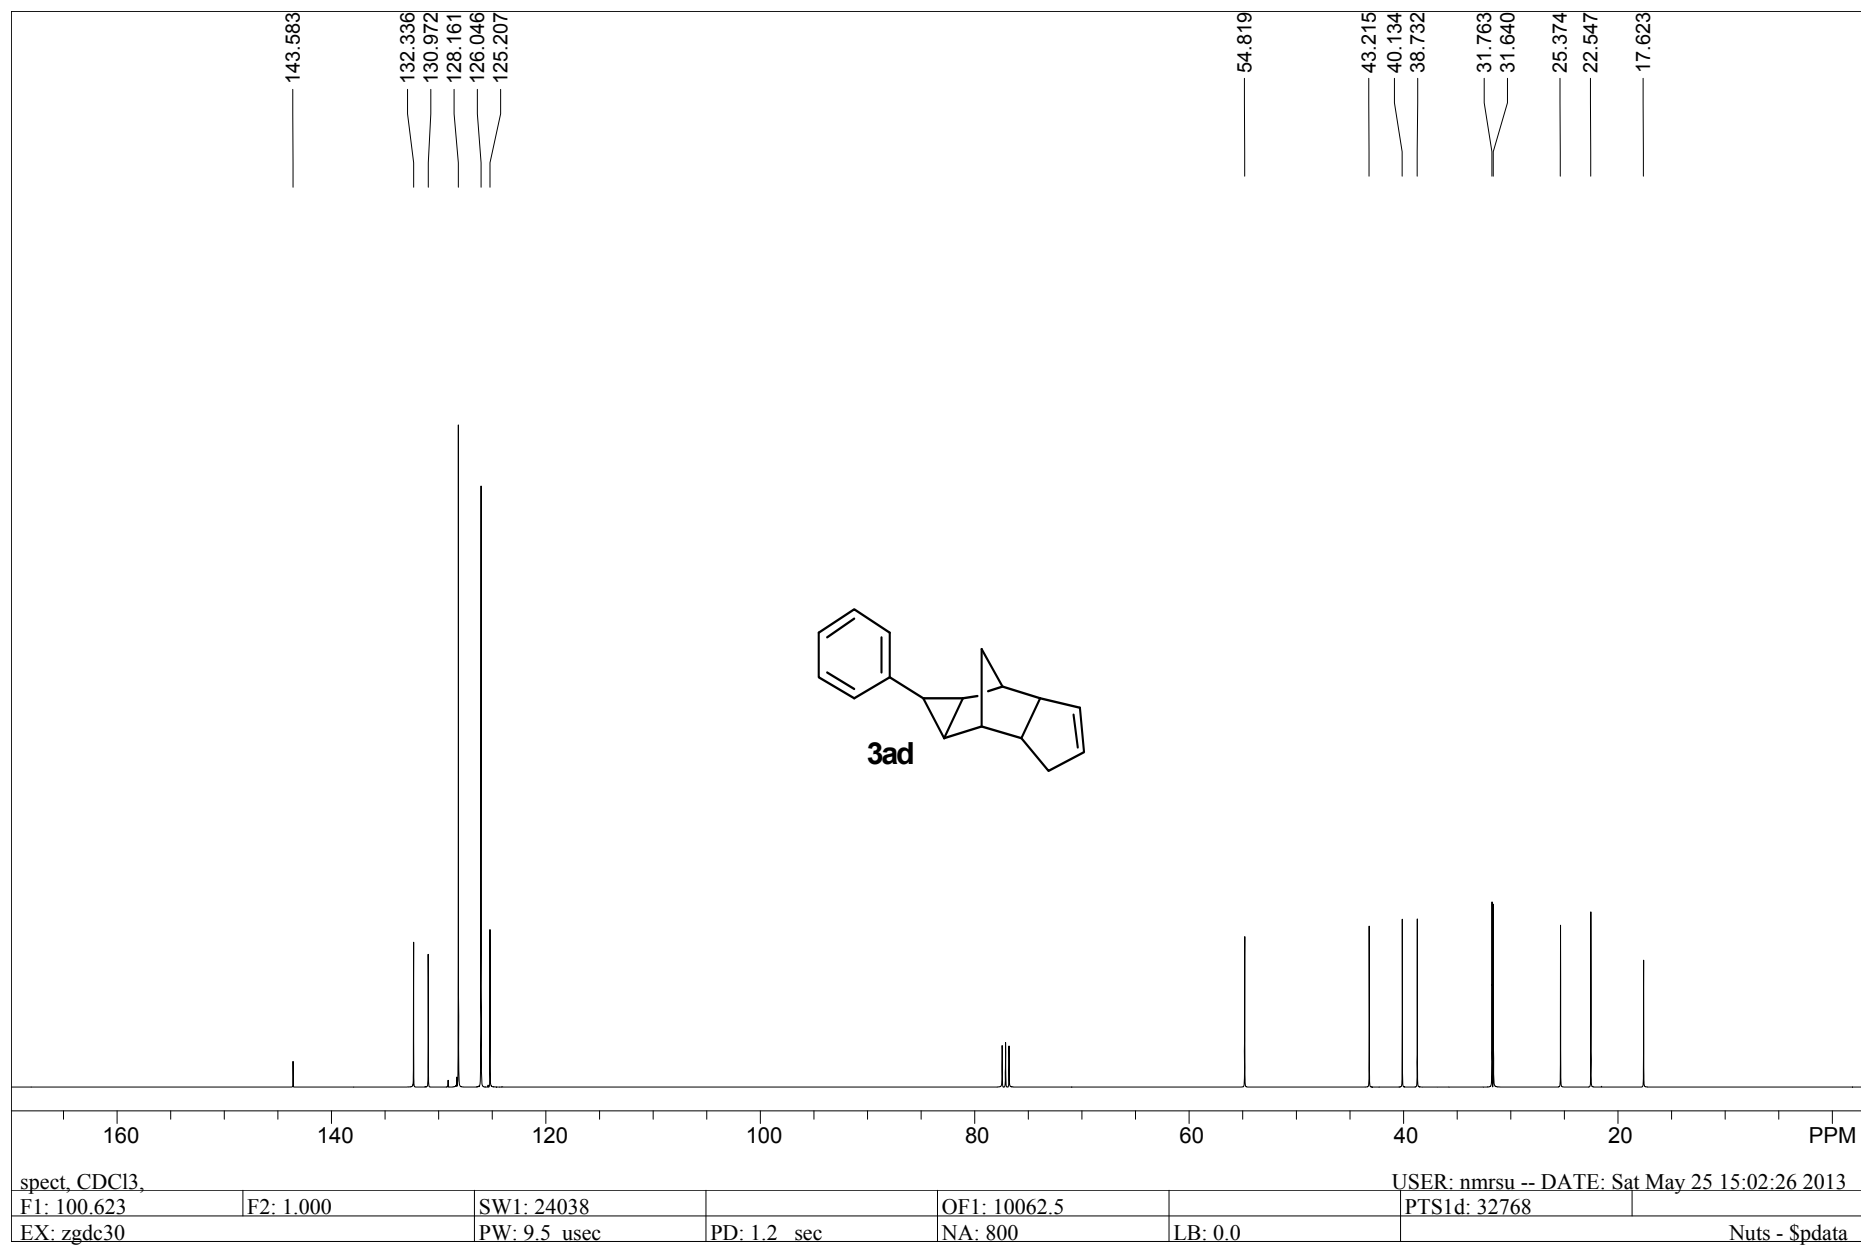

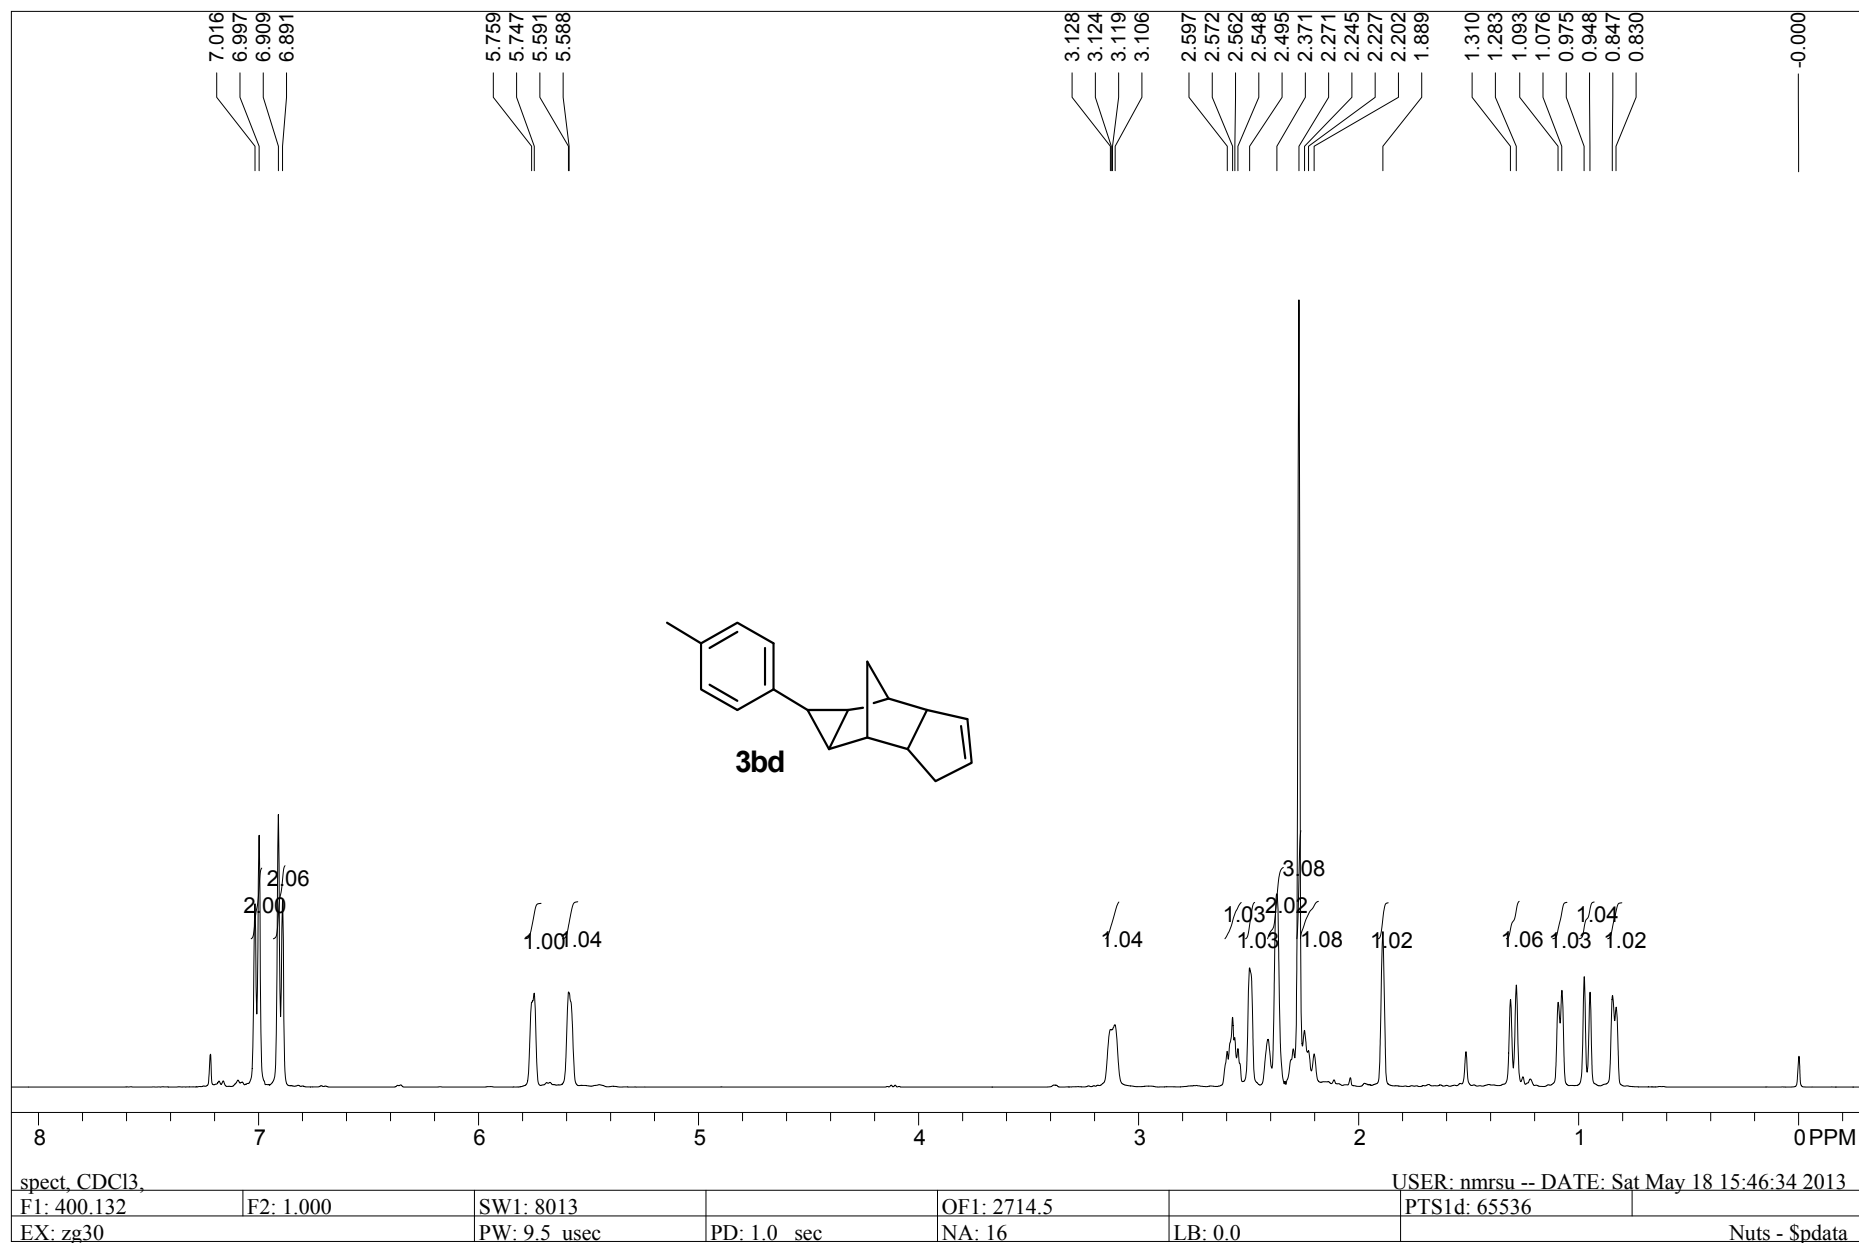

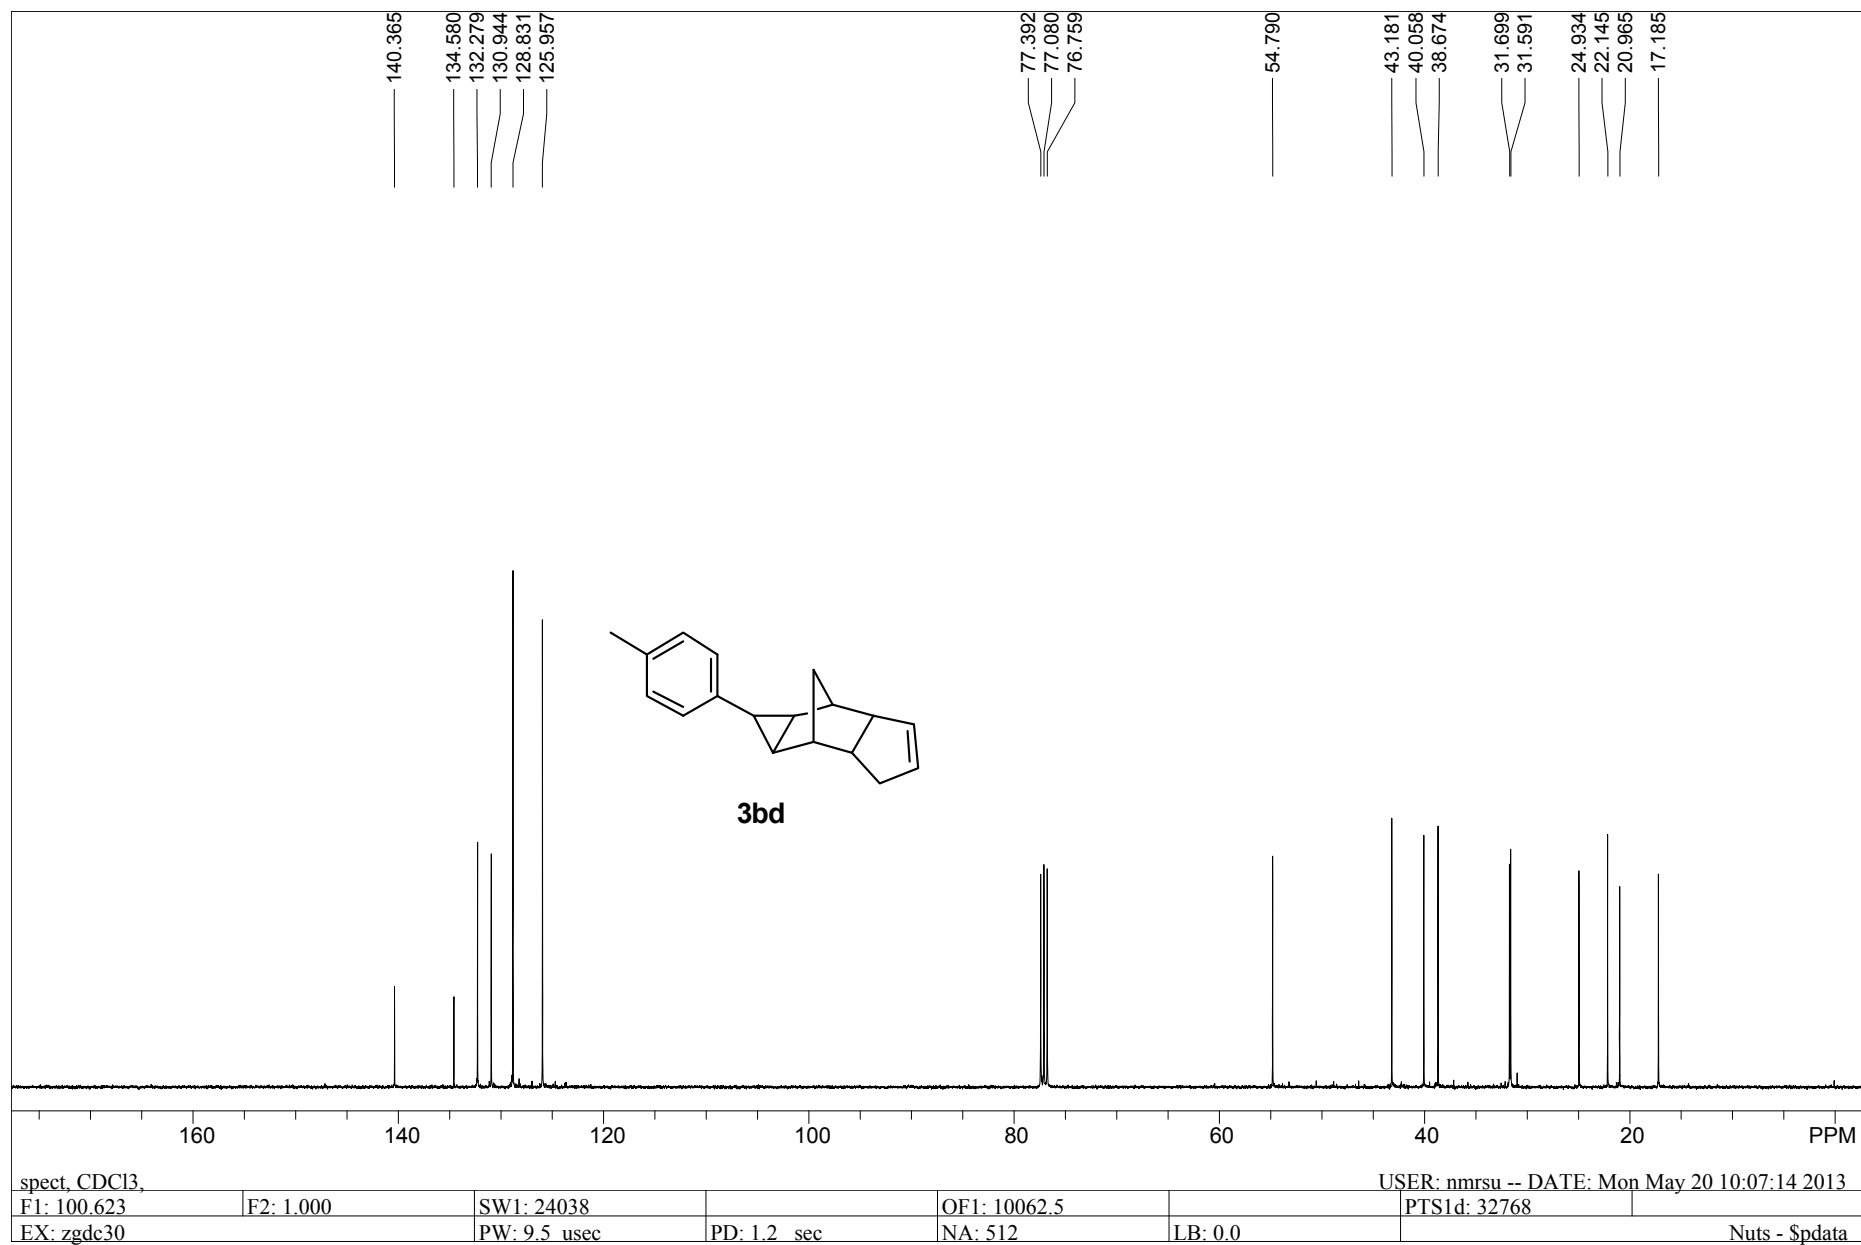

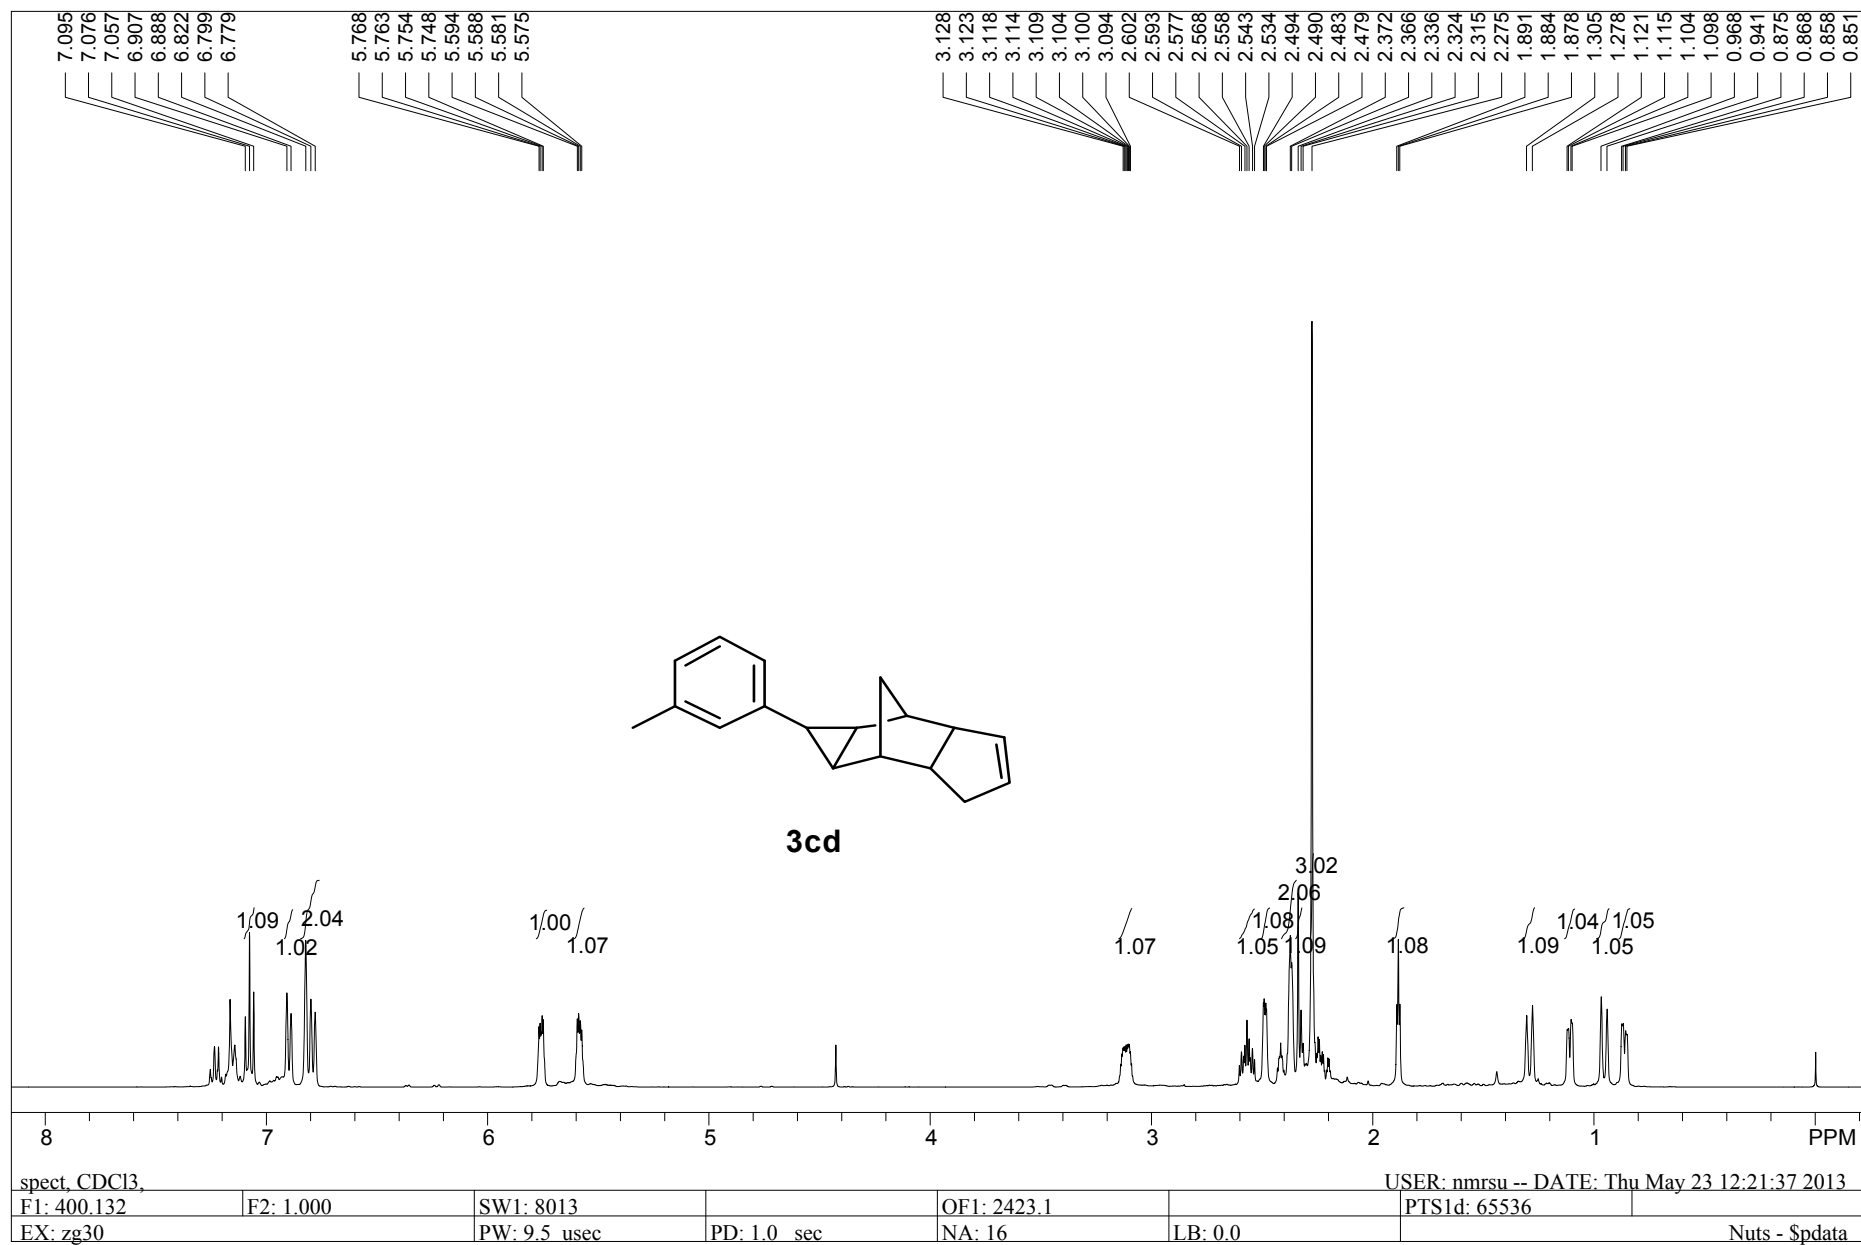

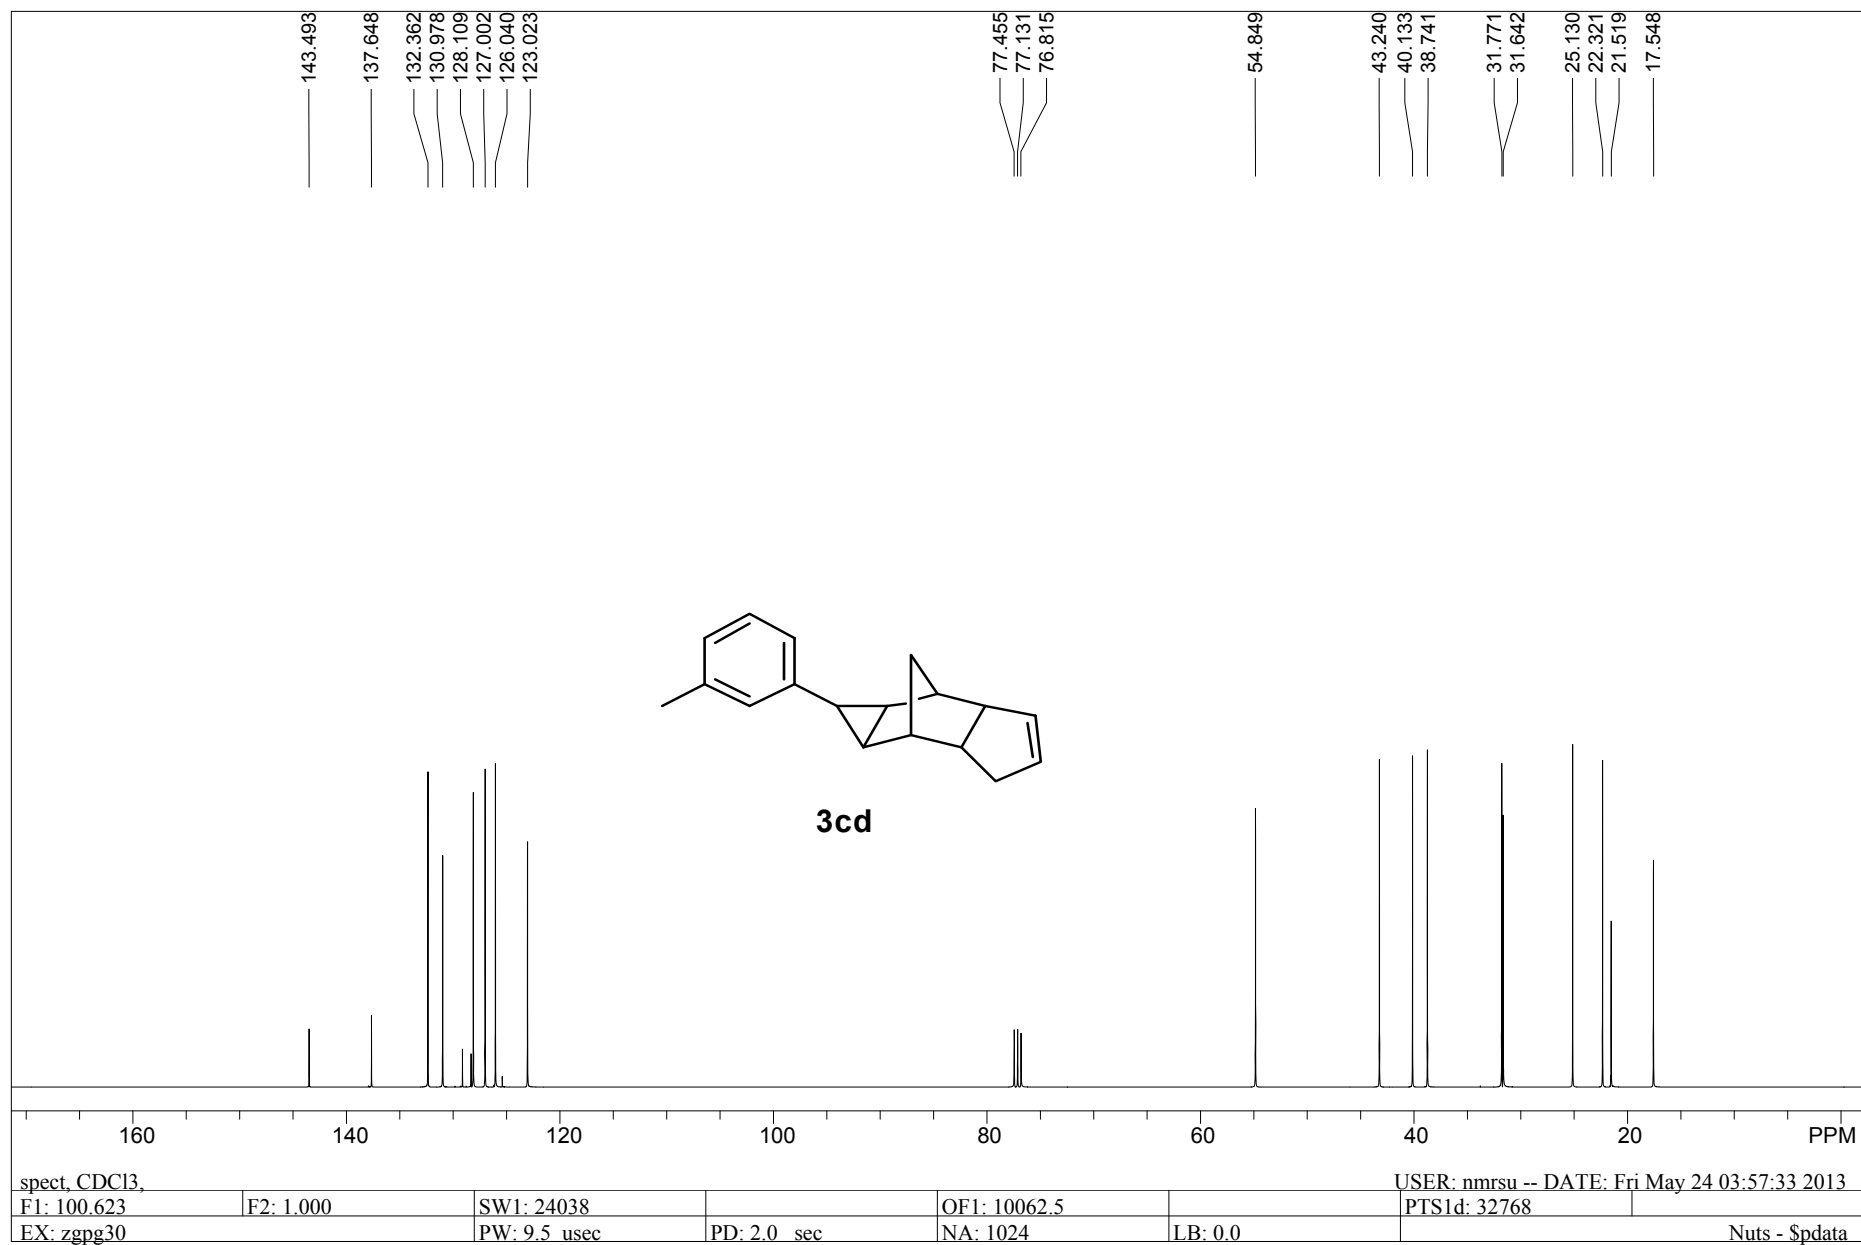

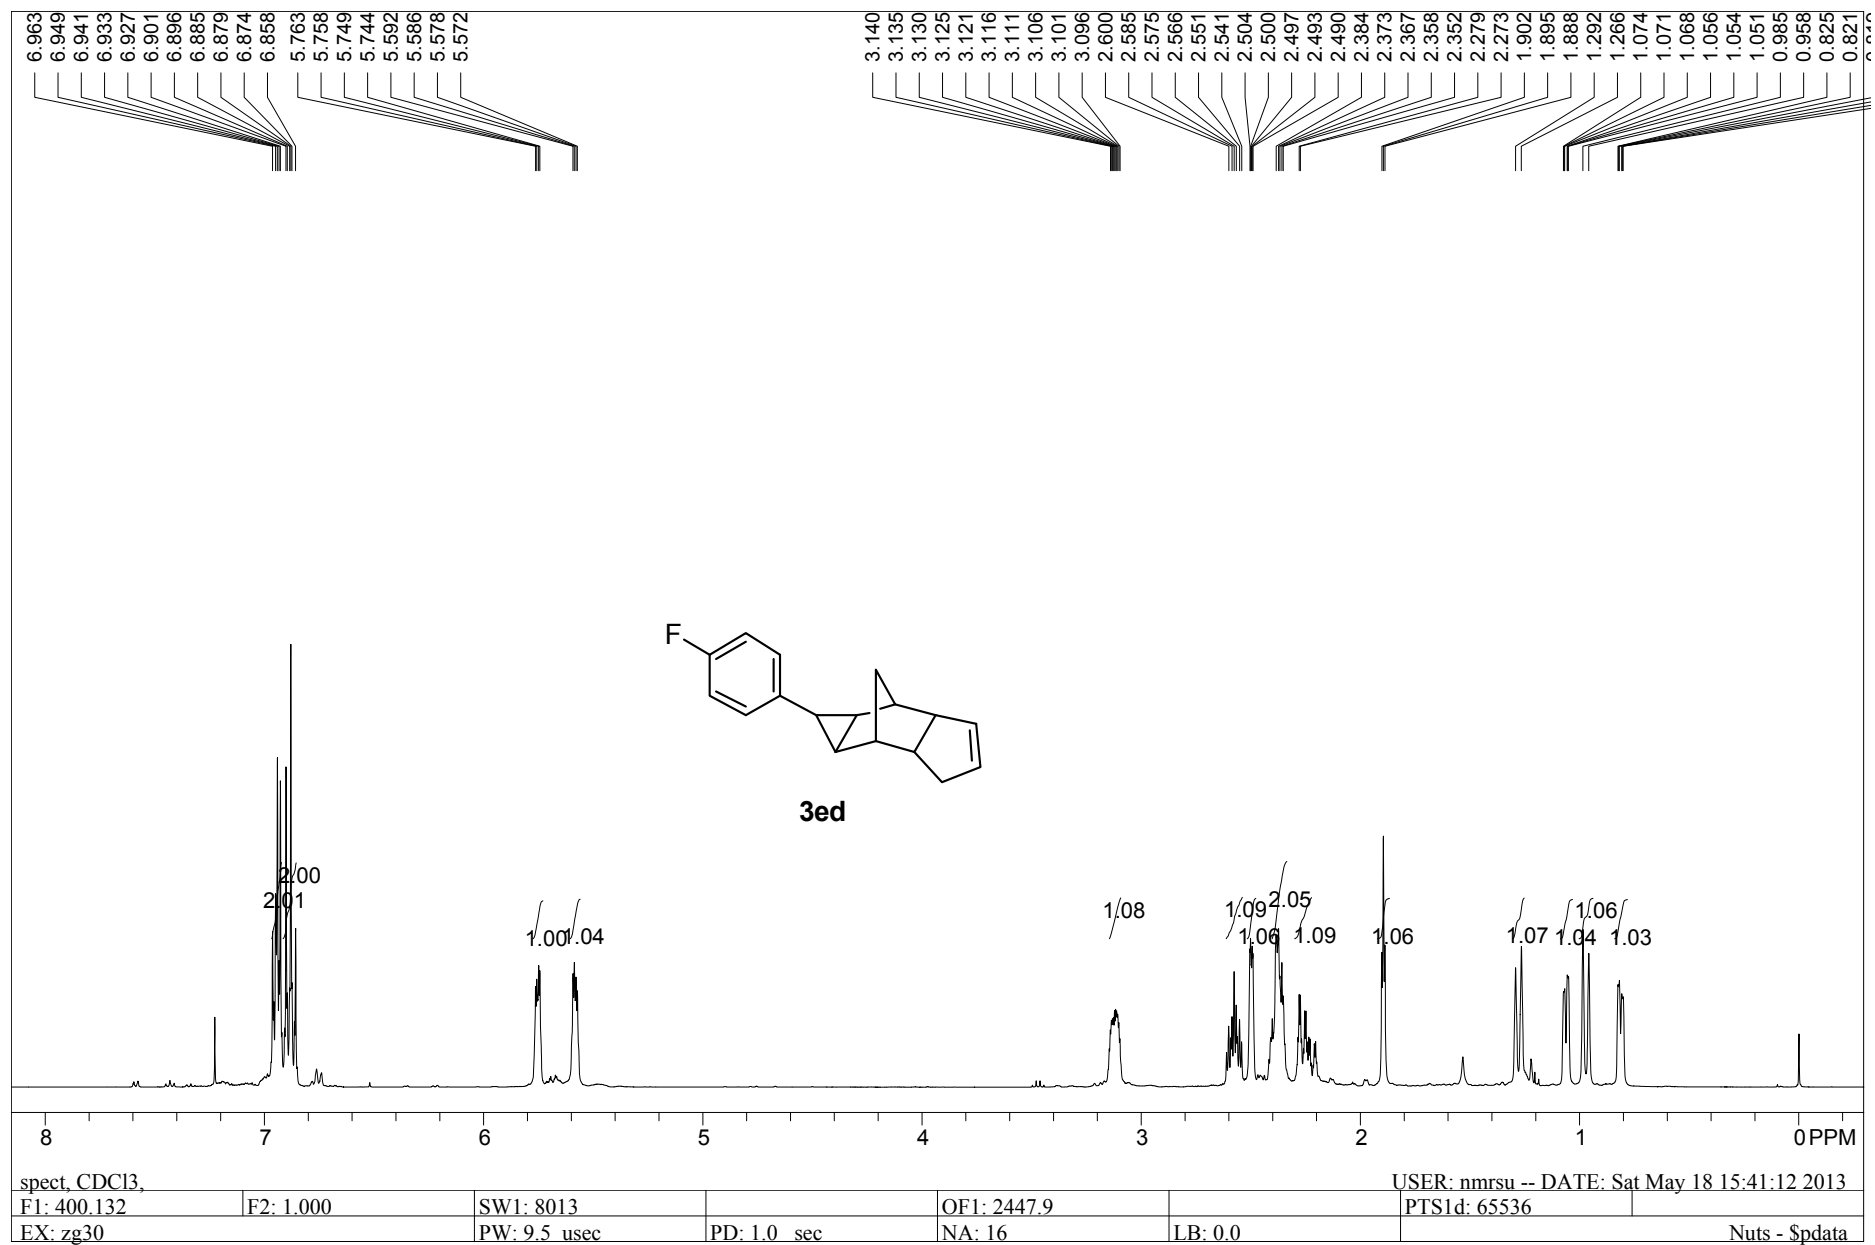



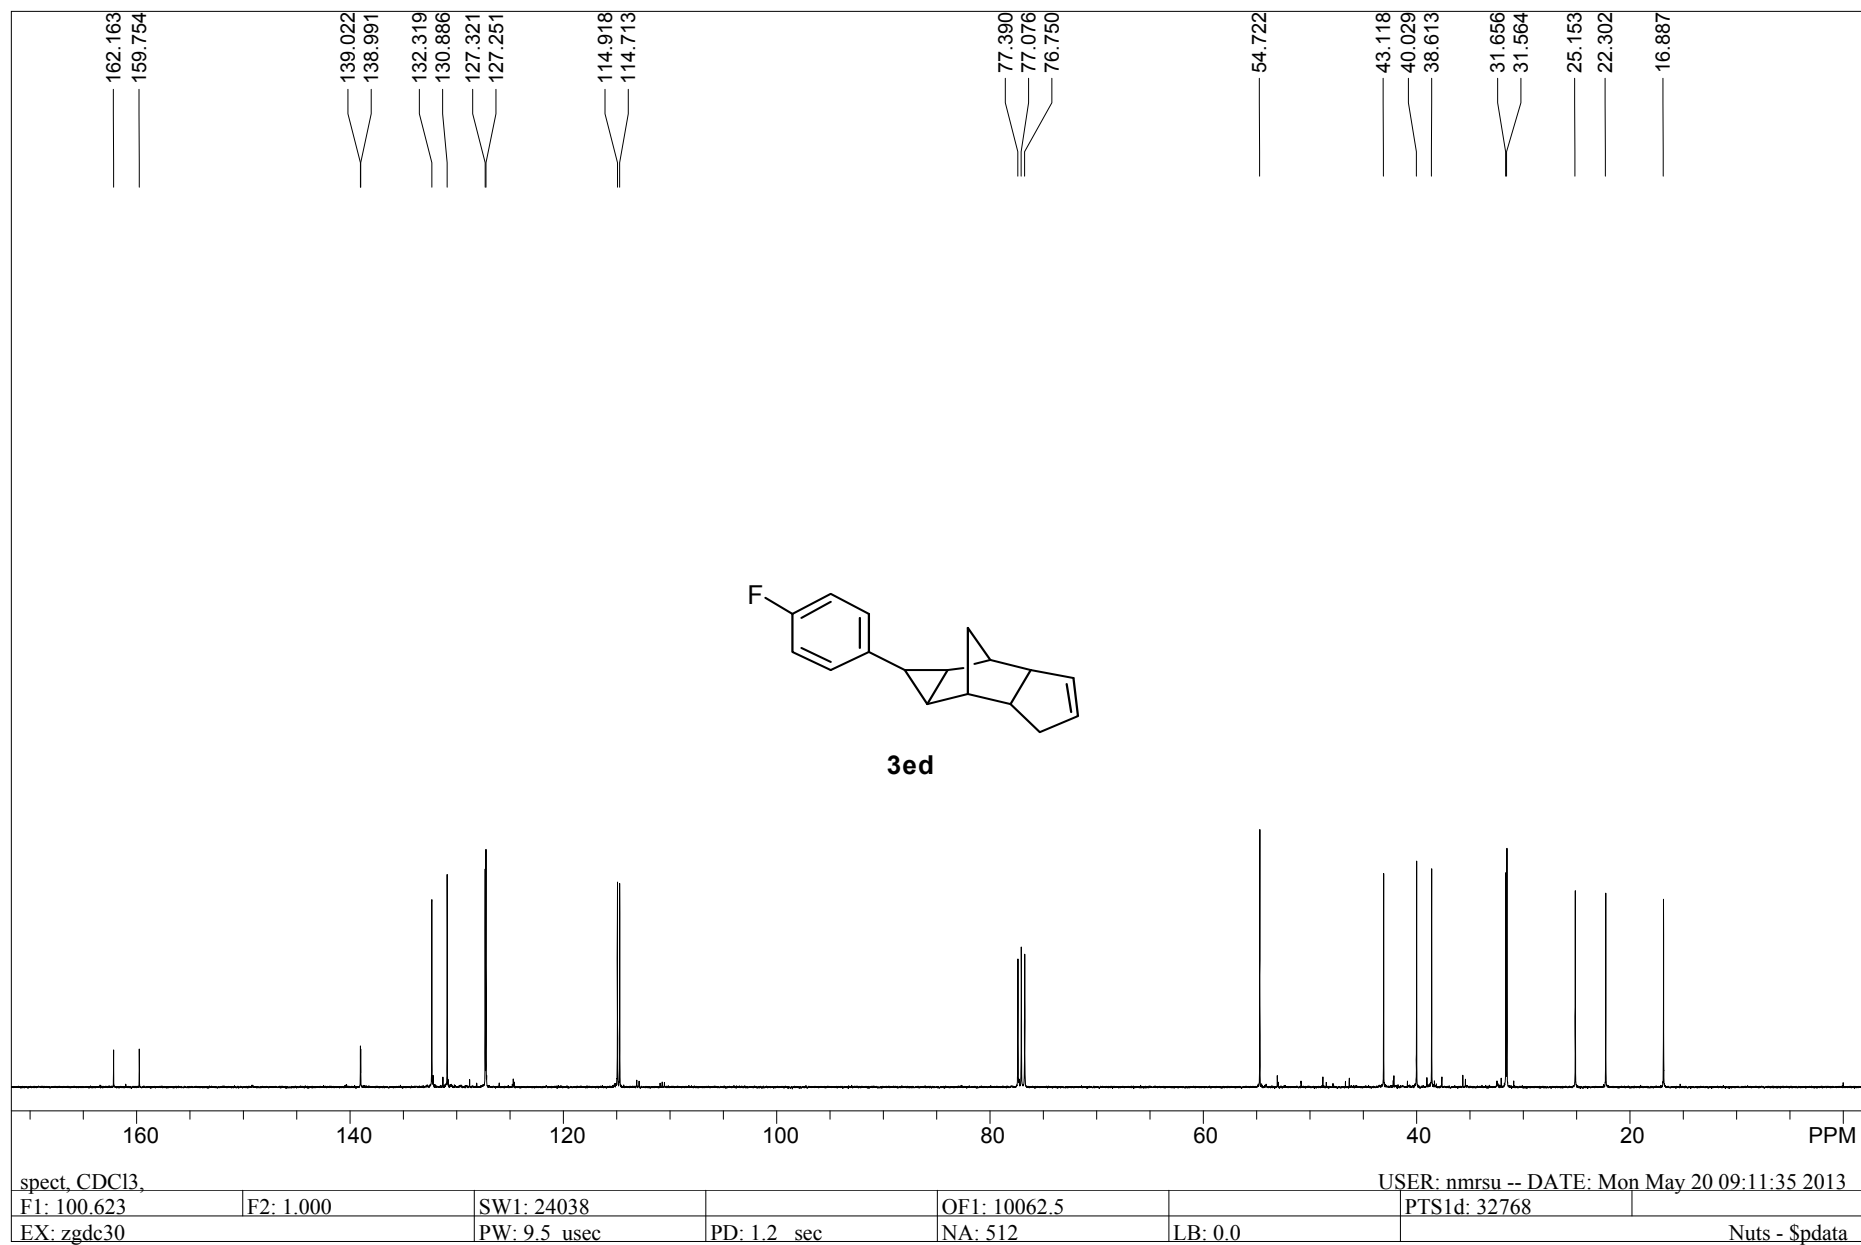

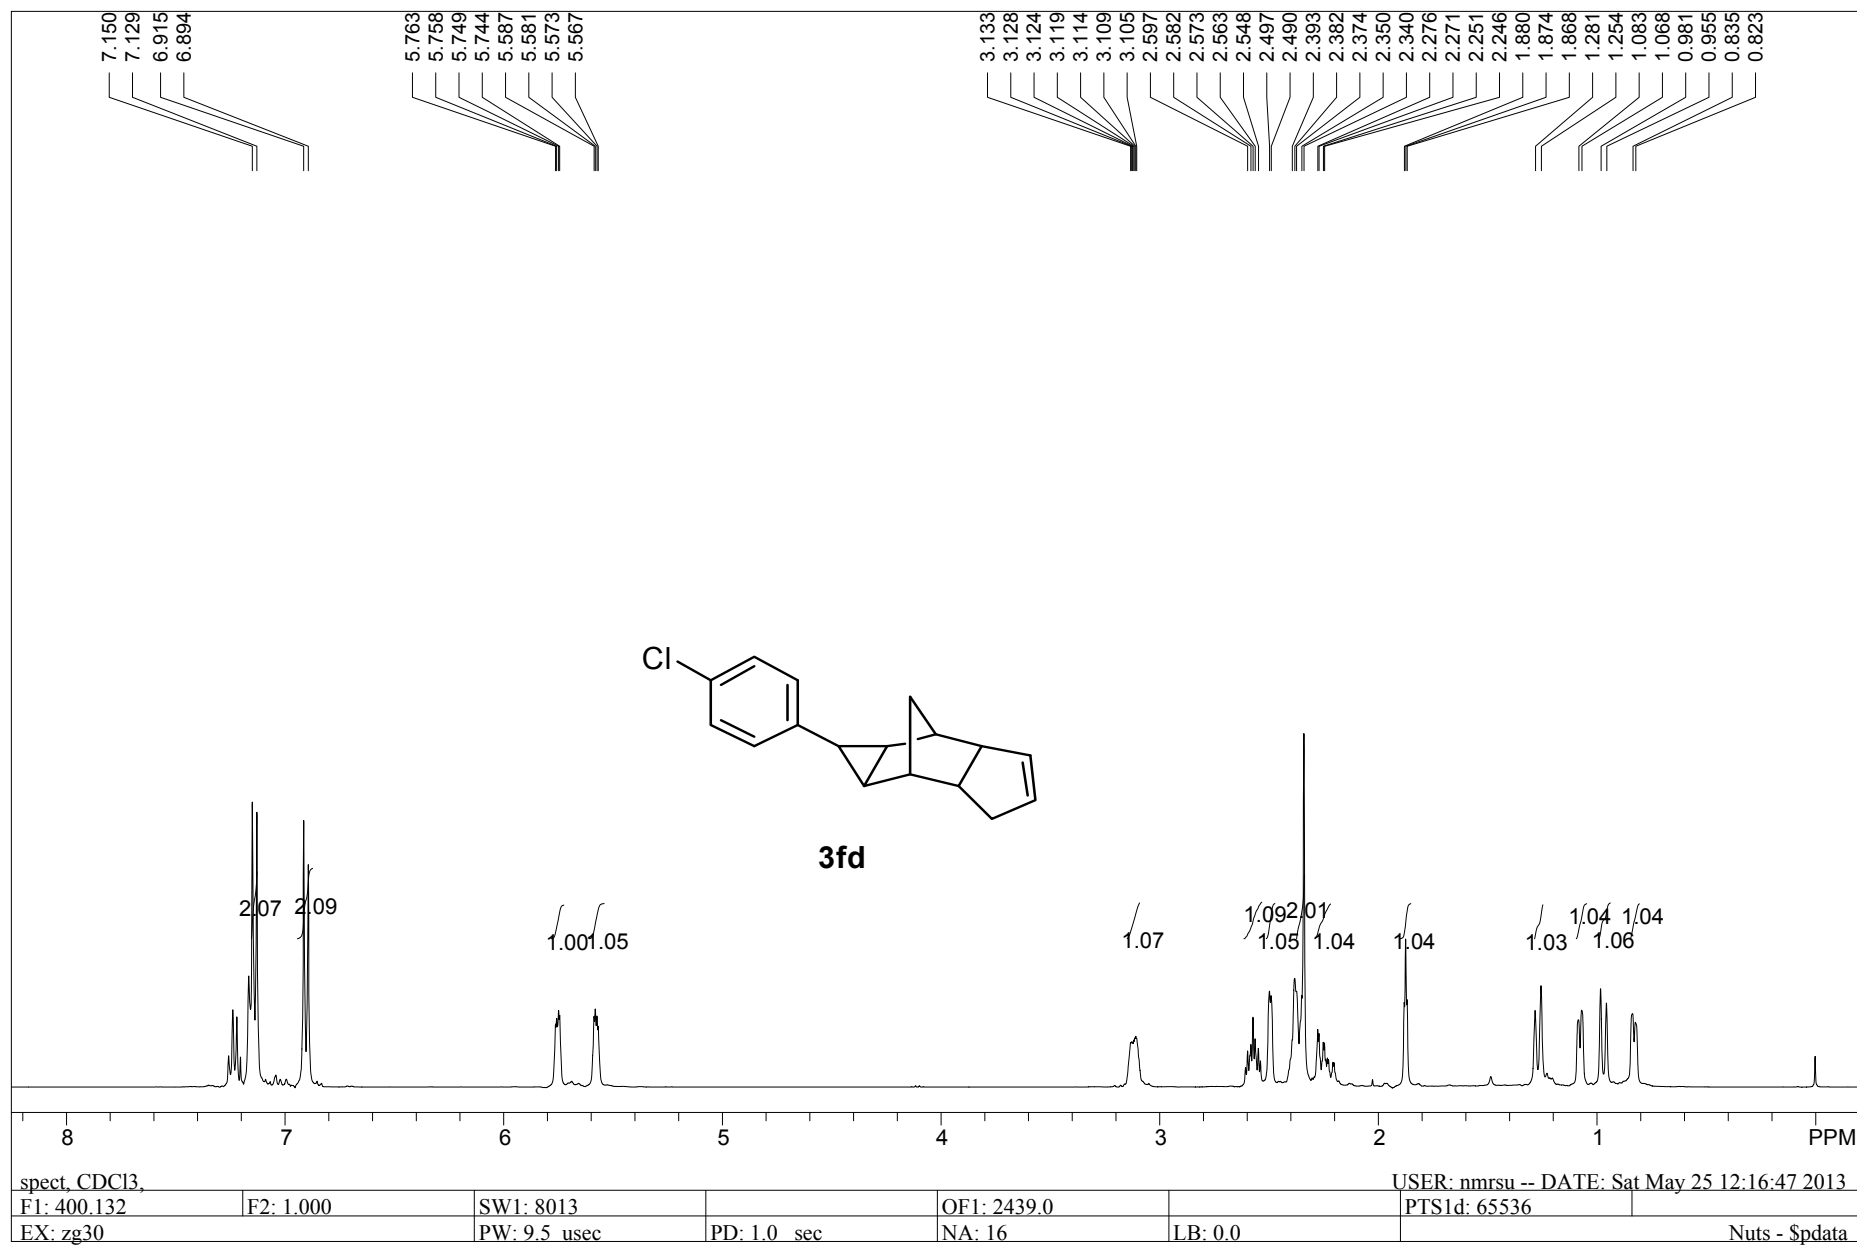

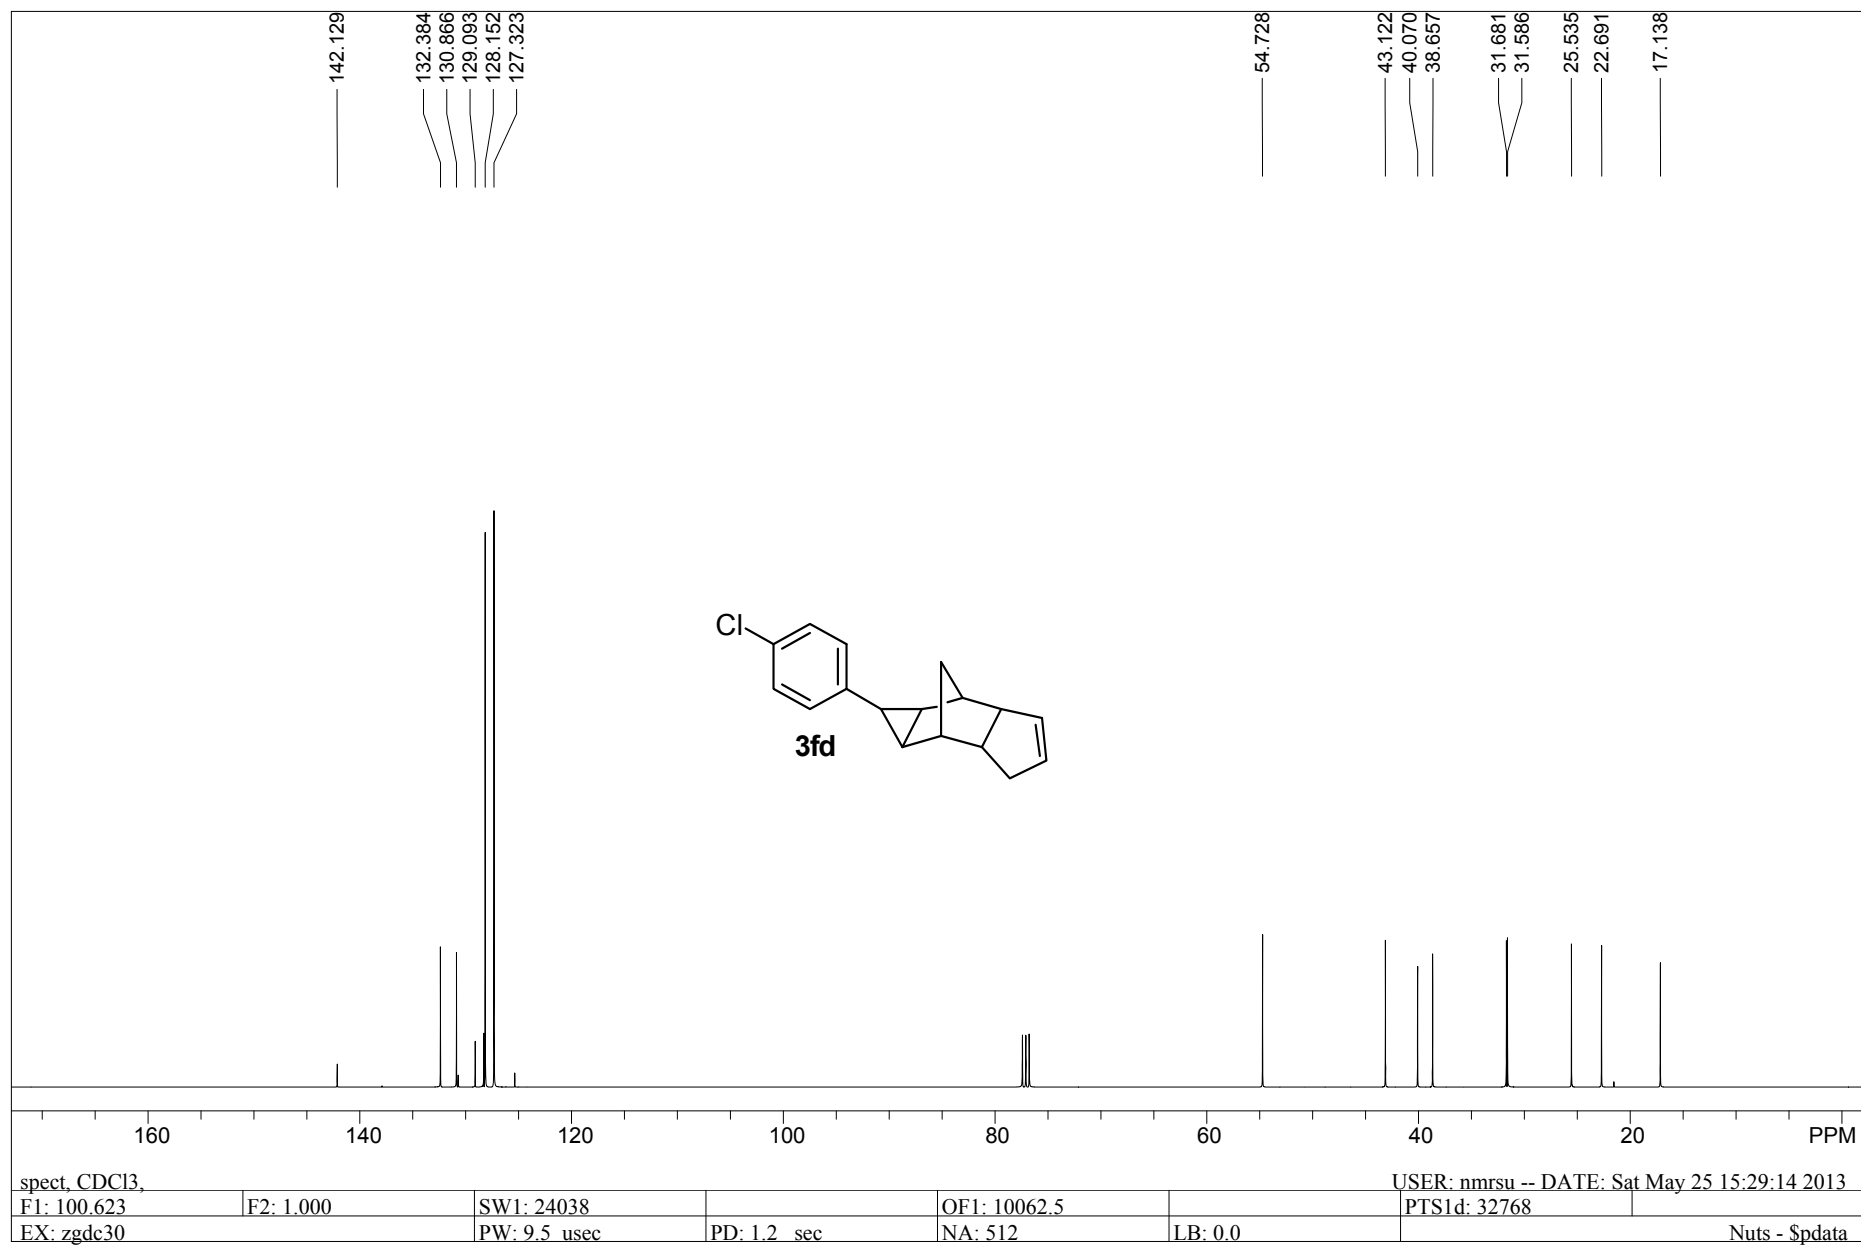

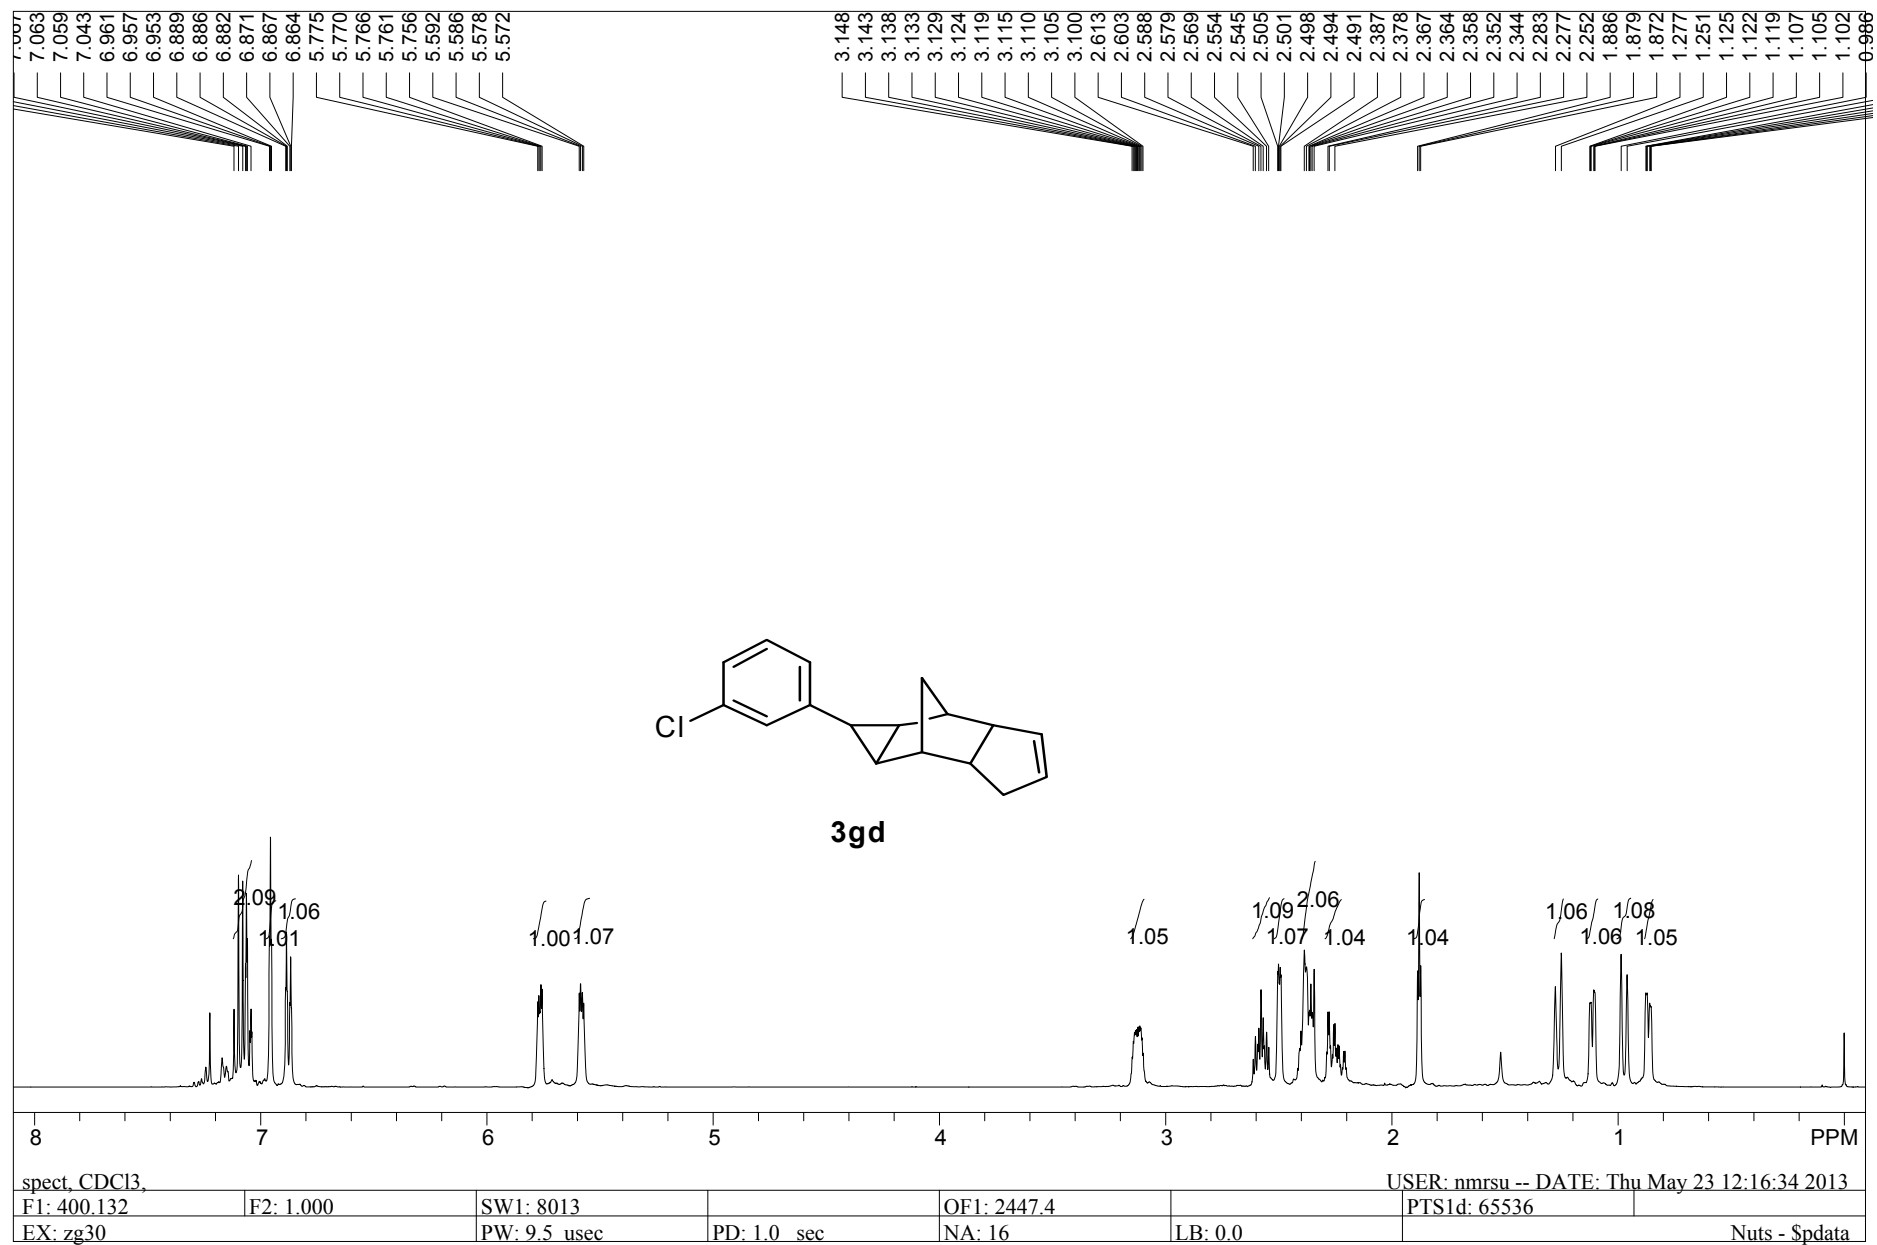

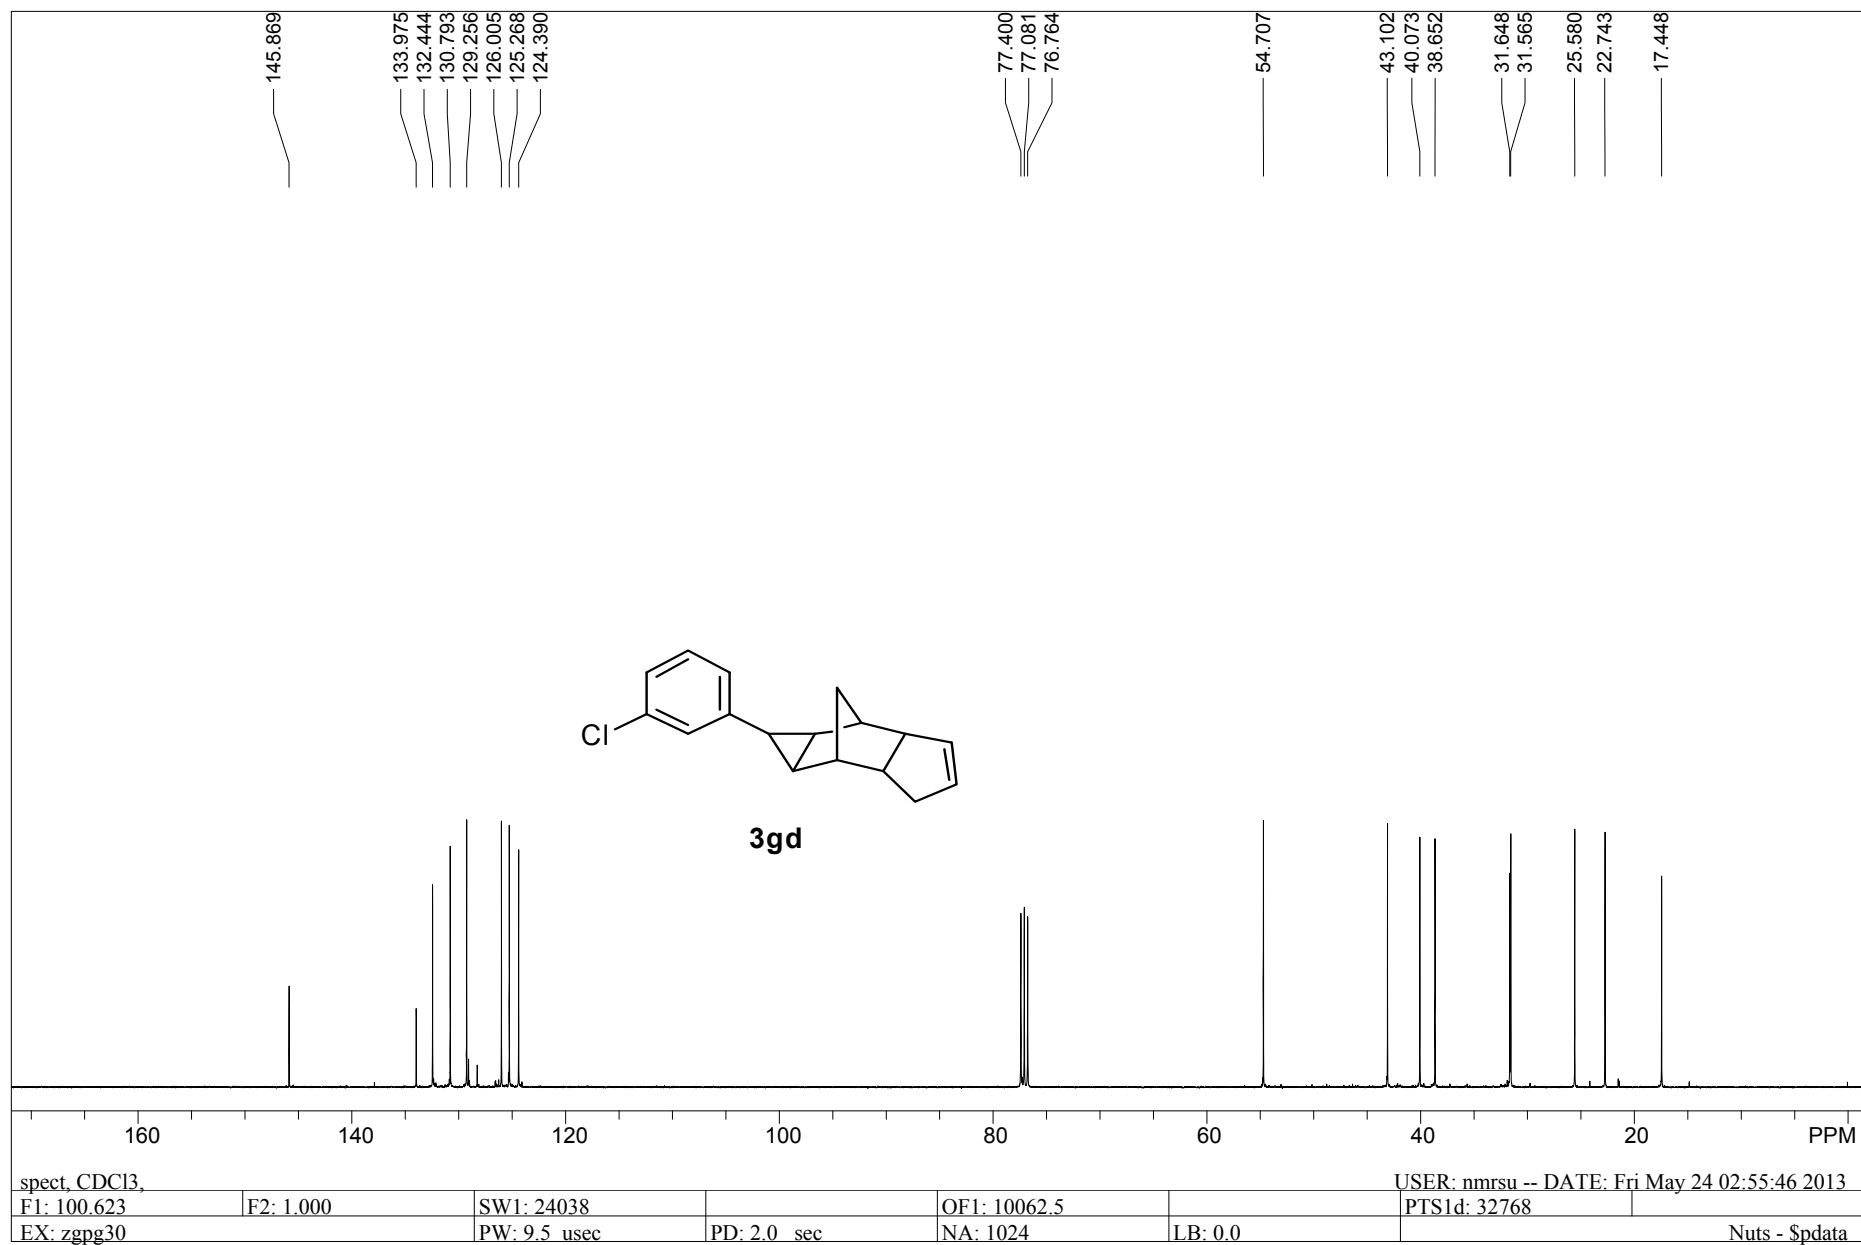

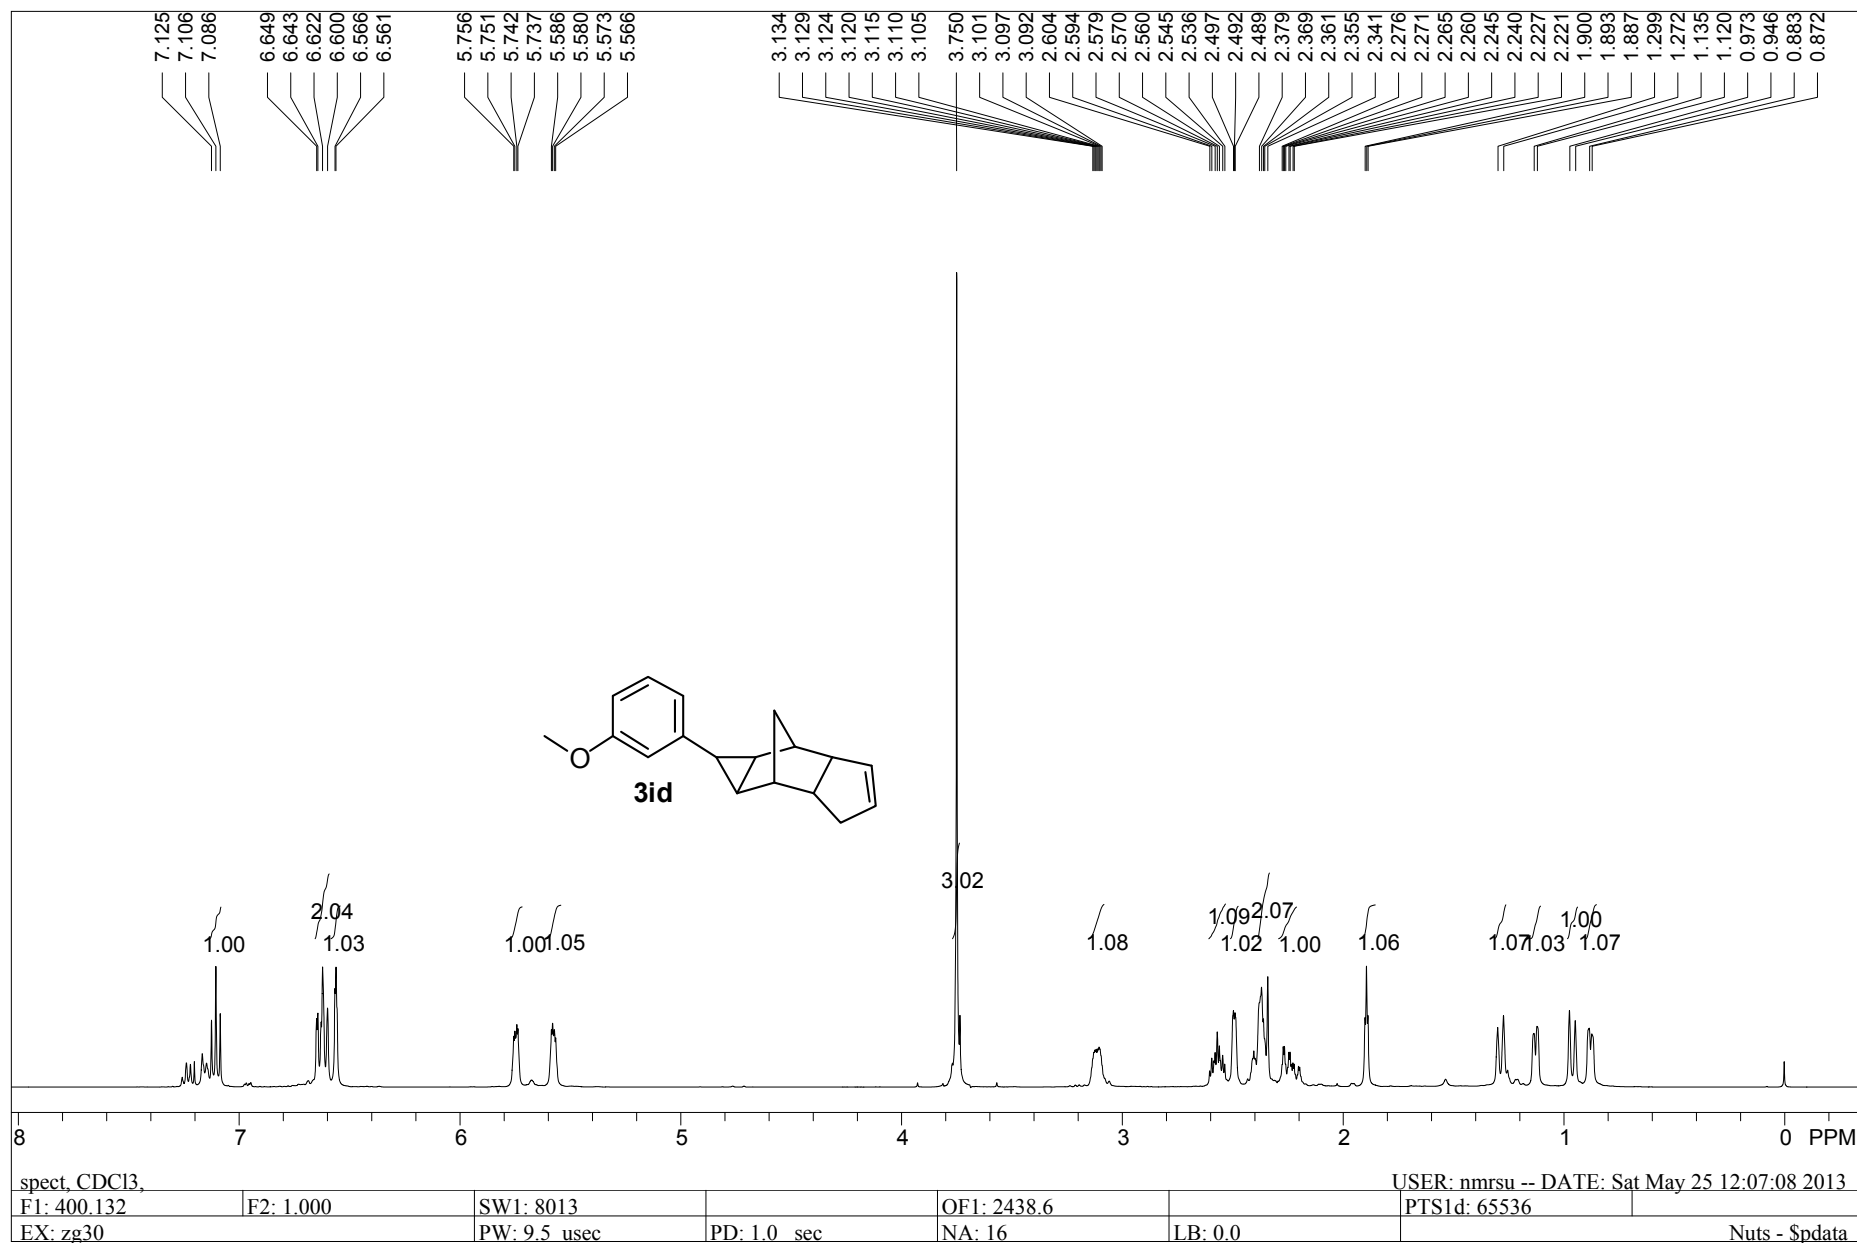

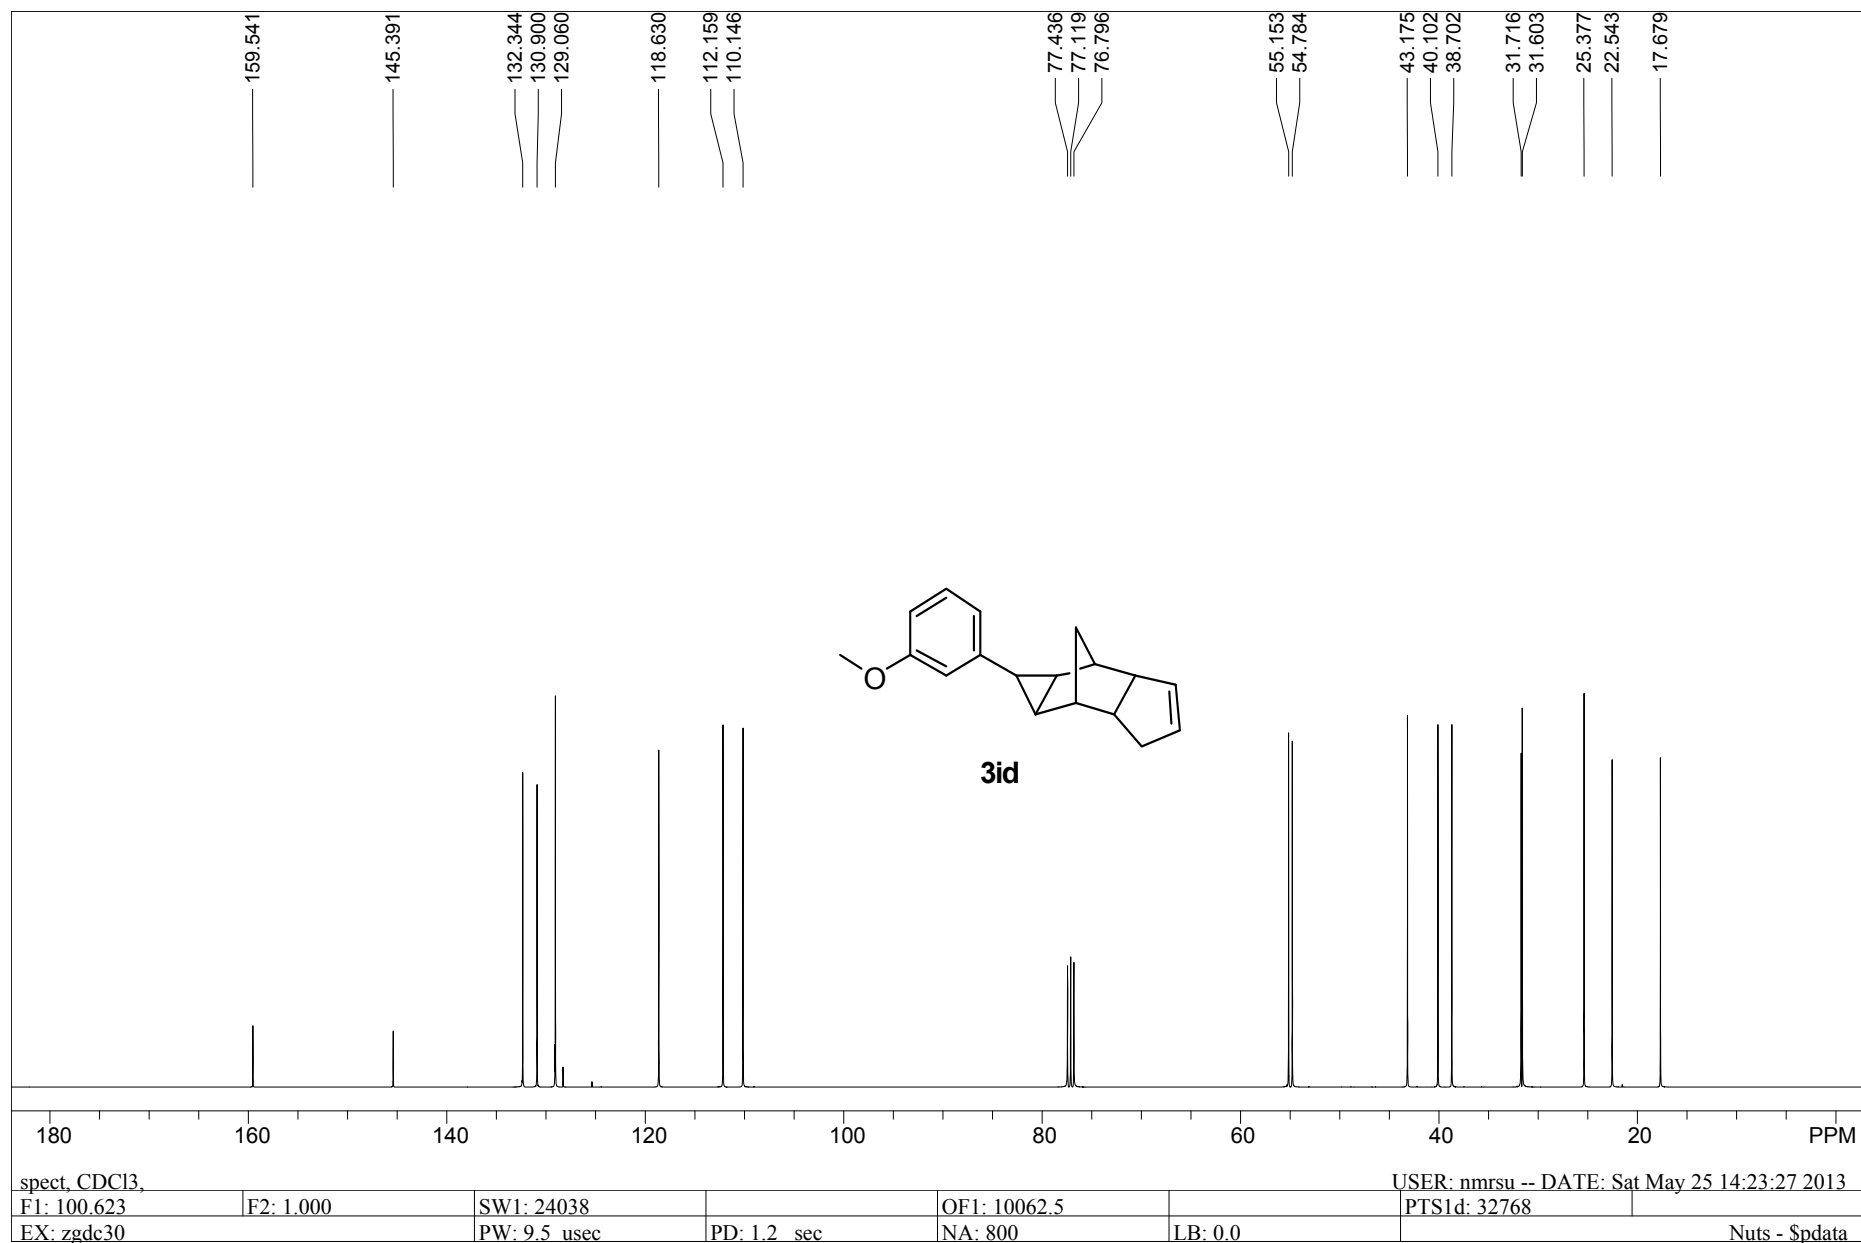

Supplement: c3cc49231a.pdf [file c3cc49231a.pdf]
